# Supplementary material for: Performance Evaluation of GFRP Rock Bolt Sensor for Rock Slope Monitoring by Double Shear Test
Source: Hindawi journal article supplement (doi:10.1155/2020/8870698), 2020-01-01
Supplement: f1 [file 8870698.f1.xlsx]

## Sheet: uncoated GFRP fixed with grout
displacement	Strain
	Head_grout	Mid1_grout	Mid2_grout	End_grout
0	0	0	0	0
0.0083	1	1	1	1
0.0166	2	2	3	3
0.025	3	3	4	4
0.0333	4	4	6	5
0.0416	4	6	7	6
0.05	6	8	8	8
0.0583	7	10	10	9
0.0666	8	10	11	11
0.075	8	12	13	13
0.0833	9	14	14	15
0.0916	11	15	15	16
0.1	13	17	15	19
0.1083	14	19	17	20
0.1166	15	21	18	23
0.125	16	23	20	24
0.1333	18	25	21	26
0.1416	19	26	24	28
0.15	21	28	25	29
0.1583	23	30	28	31
0.1666	24	32	29	33
0.175	26	35	31	35
0.1833	27	37	32	37
0.1916	29	39	35	39
0.2	31	41	36	41
0.2083	32	43	38	43
0.2166	35	46	41	44
0.225	36	48	43	47
0.2333	38	50	43	48
0.2416	40	52	46	51
0.25	42	55	49	52
0.2583	43	57	52	55
0.2666	45	59	52	57
0.275	47	62	56	59
0.2833	49	64	57	61
0.2916	51	67	60	64
0.3	53	69	62	65
0.3083	55	72	63	67
0.3166	57	75	64	69
0.325	58	77	69	72
0.3333	60	80	70	74
0.3416	62	82	73	76
0.35	64	85	76	78
0.3583	66	87	77	80
0.3666	68	90	78	82
0.375	70	93	81	84
0.3833	72	96	84	86
0.3916	75	98	85	89
0.4	76	100	87	91
0.4083	78	103	91	93
0.4166	80	106	94	95
0.425	82	107	95	98
0.4333	84	110	98	99
0.4416	86	112	101	101
0.45	87	116	102	104
0.4583	89	118	106	106
0.4666	91	121	108	108
0.475	93	124	111	111
0.4833	95	126	113	113
0.4916	97	129	116	116
0.5	98	132	118	118
0.5083	100	135	119	120
0.5166	102	138	123	123
0.525	105	141	126	126
0.5333	107	143	129	127
0.5416	109	146	132	129
0.55	111	149	133	132
0.5583	113	151	134	135
0.5666	115	154	139	137
0.575	116	157	140	140
0.5833	118	160	143	142
0.5916	120	162	146	146
0.6	122	165	148	148
0.6083	124	168	150	151
0.6166	126	171	153	153
0.625	128	173	157	155
0.6333	130	177	157	159
0.6416	131	178	161	160
0.65	134	181	162	163
0.6583	136	184	165	166
0.6666	138	186	167	169
0.675	139	189	169	172
0.6833	141	192	172	174
0.6916	143	195	174	177
0.7	145	197	178	180
0.7083	147	200	181	183
0.7166	148	203	181	185
0.725	151	206	183	189
0.7333	153	208	185	191
0.7416	154	211	189	194
0.75	156	214	190	196
0.7583	158	218	193	199
0.7666	161	221	196	202
0.775	162	223	197	205
0.7833	164	226	199	208
0.7916	166	229	200	211
0.8	167	232	203	213
0.8083	170	235	206	216
0.8166	172	238	207	218
0.825	174	241	210	222
0.8333	176	243	213	224
0.8416	178	247	216	228
0.85	180	250	218	230
0.8583	181	252	220	233
0.8666	184	256	224	236
0.875	187	259	225	239
0.8833	188	261	230	242
0.8916	190	265	231	245
0.9	193	269	235	248
0.9083	195	270	237	250
0.9166	197	274	239	253
0.925	199	277	244	256
0.9333	200	280	246	259
0.9416	202	283	249	262
0.95	205	285	253	265
0.9583	206	289	255	268
0.9666	209	292	259	271
0.975	208	295	262	275
0.9833	212	300	265	278
0.9916	214	302	267	281
1	216	305	272	284
1.0083	218	308	277	287
1.0166	220	310	279	289
1.025	222	314	283	293
1.0333	224	317	288	296
1.0416	226	320	291	299
1.05	228	323	297	302
1.0583	230	327	302	305
1.0666	232	328	307	308
1.075	234	332		311
1.0833	236	334		314
1.0916	238	338		318
1.1	240	341		320
1.1083	242	344		324
1.1166	243	346		326
1.125	245	350		329
1.1333	248	352		333
1.1416	249	355		336
1.15	251	358		340
1.1583	253	361		342
1.1666	256	364		346
1.175	258	368		350
1.1833	260	371		353
1.1916	261	373		357
1.2	263	376		360
1.2083	265	379		363
1.2166	267	382		367
1.225	268	385		370
1.2333	271	388		374
1.2416	272	391		376
1.25	274	394		380
1.2583	276	398		383
1.2666	278	401		387
1.275	279	403		391
1.2833	281	406		393
1.2916	283	409		397
1.3	284	412		400
1.3083	286	416		403
1.3166	288	419		407
1.325	289	421		410
1.3333	291	426		414
1.3416	292	428		417
1.35	294	431		420
1.3583	296	434		425
1.3666	297	437		428
1.375	299	440		432
1.3833	302	443		435
1.3916	302	445		439
1.4	304	449		442
1.4083	306	451		446
1.4166	307	455		450
1.425	309	457		453
1.4333	311	459		457
1.4416	312	462		461
1.45	314	465		464
1.4583	316	467		468
1.4666	318	470		471
1.475	318	473		475
1.4833	320	476		478
1.4916	322	478		481
1.5	323	481		485
1.5083	326	484		488
1.5166	327	487		493
1.525	328	490		495
1.5333	329	492		499
1.5416	331	494		502
1.55	333	497		505
1.5583	335	500		508
1.5666	337	503		512
1.575	338	507		515
1.5833	340	509		519
1.5916	342	511		522
1.6	343	514		526
1.6083	345	517		529
1.6166	362	520		532
1.625	371	522		535
1.6333	375	524		539
1.6416	381	527		542
1.65	385	529		546
1.6583	388	531		549
1.6666	394	535		552
1.675	398	538		555
1.6833	402	541		559
1.6916	406	544		563
1.7	411	547		565
1.7083	418	552		569
1.7166	420	569		559
1.725	421			556
1.7333	423			555
1.7416	424			553
1.75	425			552
1.7583	426			552
1.7666	427			552
1.775	429			551
1.7833	430			551
1.7916	431			551
1.8	433			551
1.8083	434			551
1.8166	435			551
1.825	436			550
1.8333	439			549
1.8416	441			548
1.85	441			548
1.8583	443			548
1.8666	445			547
1.875	446			546
1.8833	447			546
1.8916	449			546
1.9	450			546
1.9083	452			545
1.9166	454			545
1.925	455			544
1.9333	456			545
1.9416	458			545
1.95	459			545
1.9583	461			545
1.9666	463			545
1.975	465			544
1.9833	466			545
1.9916	467			545
2	469			545
2.0083	470			546
2.0166	471			546
2.025	469			546
2.0333	470			547
2.0416	472			547
2.05	473			547
2.0583	475			548
2.0666	478			548
2.075	479			549
2.0833	481			551
2.0916	484			551
2.1	486			553
2.1083	487			553
2.1166	489			555
2.125	491			556
2.1333	493			558
2.1416	495			560
2.15	496			561
2.1583	498			563
2.1666	500			565
2.175	502			567
2.1833	504			569
2.1916	506			570
2.2	508			573
2.2083	510			575
2.2166	512			578
2.225	514			581
2.2333	516			582
2.2416	518			585
2.25	521			588
2.2583	521			590
2.2666	524			592
2.275	526			595
2.2833	528			598
2.2916	531			601
2.3	533			603
2.3083	535			606
2.3166	538			609
2.325	541			612
2.3333	542			615
2.3416	544			618
2.35	547			621
2.3583	549			622
2.3666	552			626
2.375	553			630
2.3833	556			633
2.3916	558			636
2.4	560			639
2.4083	562			642
2.4166	565			646
2.425	568			650
2.4333	571			652
2.4416	574			656
2.45	576			658
2.4583	578			662
2.4666	581			664
2.475	583			667
2.4833	586			671
2.4916	589			674
2.5	591			676
2.5083	593			679
2.5166	596			682
2.525	599			686
2.5333	602			689
2.5416	605			692
2.55	607			696
2.5583	610			699
2.5666	613			701
2.575	615			705
2.5833	618			708
2.5916	621			711
2.6	623			713
2.6083	627			716
2.6166	629			720
2.625	631			723
2.6333	635			727
2.6416	637			728
2.65	640			732
2.6583	642			736
2.6666	646			739
2.675	648			741
2.6833	650			746
2.6916	653			749
2.7	656			752
2.7083	659			755
2.7166	662			758
2.725	666			761
2.7333	669			764
2.7416	672			768
2.75	675			772
2.7583	679			776
2.7666	683			780
2.775	686			783
2.7833	689			788
2.7916	693			791
2.8	696			795
2.8083	701			798
2.8166	703			802
2.825	708			806
2.8333	711			809
2.8416	714			812
2.85	718			816
2.8583	722			819
2.8666	726			823
2.875	729			826
2.8833	731			830
2.8916	734			833
2.9	737			836
2.9083	739			839
2.9166	742			843
2.925	745			846
2.9333	748			848
2.9416	751			852
2.95	756			856
2.9583	760			859
2.9666	763			861
2.975	767			865
2.9833	773			868
2.9916	777			871
3	782			874
3.0083	785			877
3.0166	791			880
3.025	796			884
3.0333	802			886
3.0416	808			890
3.05	816			893
3.0583	824			896
3.0666	832			897
3.075	840			900
3.0833	850			903
3.0916	859			906
3.1	867			909
3.1083	876			910
3.1166	884			911
3.125	892			915
3.1333	899			917
3.1416	907			920
3.15	915			922
3.1583	923			925
3.1666	930			911.4
3.175	938			919.24
3.1833	946			927.08
3.1916	951			931.98
3.2	959			939.82
3.2083	966			946.68
3.2166	973			953.54
3.225	980			960.4
3.2333	988			968.24
3.2416	995			975.1
3.25	1001			980.98
3.2583	1009			988.82
3.2666	1015			994.7
3.275	1022			1001.56
3.2833	1029			1008.42
3.2916	1036			1015.28
3.3	1042			1021.16
3.3083	1047			1026.06
3.3166	1052			1030.96
3.325	1056			1013.76
3.3333	1061			1018.56
3.3416	1067			1024.32
3.35	1072			1029.12
3.3583	1076			1032.96
3.3666	1081			1037.76
3.375	1085			1041.6
3.3833	1090			1046.4
3.3916	1095			1051.2
3.4	1099			1055.04
3.4083	1105			1060.8
3.4166	1109			1064.64
3.425	1114			1069.44
3.4333	1120			1075.2
3.4416	1125			1080
3.45	1130			1084.8
3.4583	1137			1091.52
3.4666	1143			1097.28
3.475	1150			1104
3.4833	1155			1108.8
3.4916	1161			1114.56
3.5	1166			1119.36
3.5083	1172			1125.12
3.5166	1179			1131.84
3.525	1185			1137.6
3.5333	1191			1143.36
3.5416	1196			1148.16
3.55	1200			1152
3.5583	1204			1155.84
3.5666	1210			1161.6
3.575	1216			1167.36
3.5833	1222			1173.12
3.5916	1228			1178.88
3.6	1233			1183.68
3.6083	1240			1190.4
3.6166	1246			1196.16
3.625	1251			1200.96
3.6333	1257			1206.72
3.6416	1264			1213.44
3.65	1269			1218.24
3.6583	1275			1224
3.6666	1281			1229.76
3.675	1286			1234.56
3.6833	1290			1238.4
3.6916	1296			1244.16
3.7	1301			1248.96
3.7083	1306			1253.76
3.7166	1312			1259.52
3.725	1318			1265.28
3.7333	1323			1270.08
3.7416	1328			1274.88
3.75	1334			1280.64
3.7583	1339			1285.44
3.7666	1345			1291.2
3.775	1350			1296
3.7833	1355			1300.8
3.7916	1360			1305.6
3.8	1365			1310.4
3.8083	1370			1315.2
3.8166	1376			1320.96
3.825	1382			1326.72
3.8333	1389			1333.44
3.8416	1396			1340.16
3.85	1405			1348.8
3.8583	1412			1355.52
3.8666	1419			1362.24
3.875	1424			1367.04
3.8833	1430			1372.8
3.8916	1436			1378.56
3.9	1442			1384.32
3.9083	1447			1389.12
3.9166	1452			1393.92
3.925	1458			1399.68
3.9333	1464			1405.44
3.9416	1470			1411.2
3.95	1476			1416.96
3.9583	1482			1422.72
3.9666	1486			1426.56
3.975	1492			1432.32
3.9833	1499			1439.04
3.9916	1504			1443.84
4	1510			1449.6
4.0083	1515			1454.4
4.0166	1520			1459.2
4.025	1525			1464
4.0333	1530			1468.8
4.0416	1535			1473.6
4.05	1539			1477.44
4.0583	1543			1481.28
4.0666	1547			1485.12
4.075	1531			1469.76
4.0833	1528			1466.88
4.0916	1529			1467.84
4.1	1531			1469.76
4.1083	1539			1477.44
4.1166	1550			1488
4.125	1559			1496.64
4.1333	1567			1504.32
4.1416	1576			1512.96
4.15	1583			1519.68
4.1583	1587			1523.52
4.1666	1595			1531.2
4.175	1605			1540.8
4.1833	1613			1548.48
4.1916	1623			1558.08
4.2	1631			1565.76
4.2083	1639			1573.44
4.2166	1648			1582.08
4.225	1656			1589.76
4.2333	1663			1596.48
4.2416	1672			1605.12
4.25	1680			1612.8
4.2583	1688			1620.48
4.2666	1696			1628.16
4.275	1705			1636.8
4.2833	1713			1644.48
4.2916	1720			1651.2
4.3	1726			1656.96
4.3083	1733			1663.68
4.3166	1742			1672.32
4.325	1749			1679.04
4.3333	1757			1686.72
4.3416	1763			1692.48
4.35	1772			1701.12
4.3583	1779			1707.84
4.3666	1786			1714.56
4.375	1793			1721.28
4.3833	1800			1728
4.3916	1807			1698.58
4.4	1813			1704.22
4.4083	1820			1710.8
4.4166	1826			1716.44
4.425	1833			1723.02
4.4333	1839			1728.66
4.4416	1845			1734.3
4.45	1851			1739.94
4.4583	1858			1746.52
4.4666	1865			1753.1
4.475	1870			1757.8
4.4833	1878			1765.32
4.4916	1884			1770.96
4.5	1890			1776.6
4.5083	1896			1782.24
4.5166	1902			1787.88
4.525	1908			1793.52
4.5333	1914			1799.16
4.5416	1921			1805.74
4.55	1928			1812.32
4.5583	1936			1819.84
4.5666	1942			1825.48
4.575	1949			1832.06
4.5833	1954			1836.76
4.5916	1959			1841.46
4.6	1966			1848.04
4.6083	1972			1853.68
4.6166	1978			1859.32
4.625	1983			1864.02
4.6333	1990			1870.6
4.6416	1997			1877.18
4.65	2004			1883.76
4.6583	2011			1890.34
4.6666	2017			1895.98
4.675	2025			1903.5
4.6833	2033			1911.02
4.6916	2042			1919.48
4.7	2055			1931.7
4.7083	2073			1948.62
4.7166	2090			1964.6
4.725	2100			1974
4.7333	2109			1982.46
4.7416	2115			1988.1
4.75	2119			1991.86
4.7583	2123			1995.62
4.7666	2187			2055.78
4.775	2178			2047.32
4.7833	2177			2046.38
4.7916	2180			2049.2
4.8	2184			2052.96
4.8083	2190			2058.6
4.8166	2195			2063.3
4.825	2200			2068
4.8333	2205			2072.7
4.8416	2212			2079.28
4.85	2218			2084.92
4.8583	2224			2090.56
4.8666	2231			2097.14
4.875	2238			2103.72
4.8833	2243			2108.42
4.8916	2249			2114.06
4.9	2254			2118.76
4.9083	2261			2125.34
4.9166	2267			2130.98
4.925	2274			2137.56
4.9333	2280			2143.2
4.9416	2285			2147.9
4.95	2291			2153.54
4.9583	2297			2159.18
4.9666	2300			2162
4.975	2305			2166.7
4.9833	2310			2171.4
4.9916	2313			2174.22
5	2318			2178.92
5.0083	2325			2185.5
5.0166	2331			2191.14
5.025	2338			2197.72
5.0333	2345			2204.3
5.0416	2351			2209.94
5.05	2357			2215.58
5.0583	2362			2220.28
5.0666	2367			2224.98
5.075	2371			2228.74
5.0833	2374			2231.56
5.0916	2377			2234.38
5.1	2377			2234.38
5.1083	2392			2248.48
5.1166	2400			2256
5.125	2409			2264.46
5.1333	2418			2272.92
5.1416	2427			2281.38
5.15	2435			2288.9
5.1583	2443			2296.42
5.1666	2449			2302.06
5.175	2455			2307.7
5.1833	2459			2311.46
5.1916	2465			2317.1
5.2	2471			2322.74
5.2083	2479			2330.26
5.2166	2487			2337.78
5.225	2494			2344.36
5.2333	2504			2353.76
5.2416	2510			2359.4
5.25	2514			2363.16
5.2583	2523			2371.62
5.2666	2527			2375.38
5.275	2531			2379.14
5.2833	2536			2383.84
5.2916	2541			2388.54
5.3	2547			2394.18
5.3083	2553			2399.82
5.3166	2560			2406.4
5.325	2568			2413.92
5.3333	2575			2420.5
5.3416	2581			2426.14
5.35	2588			2432.72
5.3583	2593			2437.42
5.3666	2599			2443.06
5.375	2604			2447.76
5.3833	2609			2452.46
5.3916	2615			2458.1
5.4	2620			2462.8
5.4083	2626			2468.44
5.4166	2633			2475.02
5.425	2640			2481.6
5.4333	2647			2488.18
5.4416	2654			2494.76
5.45	2660			2500.4
5.4583	2666			2506.04
5.4666	2673			2512.62
5.475	2678			2517.32
5.4833	2684			2522.96
5.4916	2692			2530.48
5.5	2698			2536.12
5.5083	2705			2542.7
5.5166	2712			2549.28
5.525	2716			2553.04
5.5333	2720			2556.8
5.5416	2726			2562.44
5.55	2731			2567.14
5.5583	2738			2573.72
5.5666	2745			2580.3
5.575	2751			2585.94
5.5833	2757			2591.58
5.5916	2762			2596.28
5.6	2768			2629.6
5.6083	2772			2633.4
5.6166	2776			2637.2
5.625	2780			2641
5.6333	2785			2645.75
5.6416	2791			2651.45
5.65	2797			2657.15
5.6583	2802			2661.9
5.6666	2809			2668.55
5.675	2814			2673.3
5.6833	2822			2680.9
5.6916	2827			2685.65
5.7	2832			2690.4
5.7083	2840			2698
5.7166	2846			2703.7
5.725	2852			2709.4
5.7333	2858			2715.1
5.7416	2863			2719.85
5.75	2868			2724.6
5.7583	2874			2730.3
5.7666	2878			2734.1
5.775	2884			2739.8
5.7833	2890			2745.5
5.7916	2895			2750.25
5.8	2900			2755
5.8083	2905			2759.75
5.8166	2911			2765.45
5.825	2916			2770.2
5.8333	2922			2775.9
5.8416	2928			2781.6
5.85	2932			2785.4
5.8583	2938			2791.1
5.8666	2943			2795.85
5.875	2948			2800.6
5.8833	2952			2804.4
5.8916	2955			2807.25
5.9	2961			2812.95
5.9083	2965			2816.75
5.9166	2970			2821.5
5.925	2976			2827.2
5.9333	2981			2831.95
5.9416	2985			2835.75
5.95	2990			2840.5
5.9583	2996			2846.2
5.9666	3000			2850
5.975	3005			2854.75
5.9833	3010			2859.5
5.9916	3017			2866.15
6	3022			2870.9
6.0083	3027			2875.65
6.0166	3033			2881.35
6.025	3037			2885.15
6.0333	3043			2890.85
6.0416	3048			2895.6
6.05	3056			2903.2
6.0583	3059			2906.05
6.0666	3065			2911.75
6.075	3071			2917.45
6.0833	3077			2923.15
6.0916	3082			2927.9
6.1	3086			2931.7
6.1083	3092			2937.4
6.1166	3097			2942.15
6.125	3102			2946.9
6.1333	3107			2951.65
6.1416	3115			2959.25
6.15	3120			2964
6.1583	3119			2963.05
6.1666	3121			2964.95
6.175	3124			2967.8
6.1833	3127			2970.65
6.1916	3131			2974.45
6.2	3134			2977.3
6.2083	3137			2980.15
6.2166	3138			2981.1
6.225	3141			2983.95
6.2333	3143			2985.85
6.2416	3145			2987.75
6.25	3148			2990.6
6.2583	3152			2994.4
6.2666	3156			2998.2
6.275	3158			3000.1
6.2833	3162			3003.9
6.2916	3168			3009.6
6.3	3171			3012.45
6.3083	3175			3016.25
6.3166	3180			3021
6.325	3183			3023.85
6.3333	3187			3027.65
6.3416	3191			3031.45
6.35	3196			3036.2
6.3583	3203			3042.85
6.3666	3209			3048.55
6.375	3214			3053.3
6.3833	3218			3057.1
6.3916	3222			3060.9
6.4	3226			3064.7
6.4083	3232			3070.4
6.4166	3235			3073.25
6.425	3239			3077.05
6.4333	3244			3081.8
6.4416	3248			3085.6
6.45	3253			3090.35
6.4583	3256			3093.2
6.4666	3261			3097.95
6.475	3265			3101.75
6.4833	3268			3104.6
6.4916	3272			3108.4
6.5	3276			3112.2
6.5083	3279			3115.05
6.5166	3283			3118.85
6.525	3288			3123.6
6.5333	3291			3126.45
6.5416	3294			3129.3
6.55	3298			3133.1
6.5583	3302			3136.9
6.5666	3305			3139.75
6.575	3309			3143.55
6.5833	3315			3149.25
6.5916	3318			3152.1
6.6	3323			3156.85
6.6083	3327			3160.65
6.6166	3332			3165.4
6.625	3335			3168.25
6.6333	3340			3173
6.6416	3343			3175.85
6.65	3345			3177.75
6.6583	3349			3181.55
6.6666	3353			3185.35
6.675	3356			3188.2
6.6833	3359			3191.05
6.6916	3363			3194.85
6.7	3368			3199.6
6.7083	3371			3202.45
6.7166	3376			3207.2
6.725	3380			3211
6.7333	3384			3214.8
6.7416	3388			3218.6
6.75	3391			3221.45
6.7583	3394			3224.3
6.7666	3396			3226.2
6.775	3400			3230
6.7833	3403			3232.85
6.7916	3407			3236.65
6.8	3409			3238.55
6.8083	3412			3241.4
6.8166	3416			3245.2
6.825	3420			3249
6.8333	3424			3252.8
6.8416	3428			3256.6
6.85	3432			3260.4
6.8583	3435			3263.25
6.8666	3438			3266.1
6.875	3442			3269.9
6.8833	3448			3275.6
6.8916	3449			3276.55
6.9	3453			3280.35
6.9083	3456			3283.2
6.9166	3460			3287
6.925	3464			3290.8
6.9333	3468			3294.6
6.9416	3470			3296.5
6.95	3475			3301.25
6.9583	3476			3302.2
6.9666	3474			3300.3
6.975	3476			3302.2
6.9833	3478			3304.1
6.9916	3481			3306.95
7	3482			3307.9
7.0083	3485			3310.75
7.0166	3486			3311.7
7.025	3486			3311.7
7.0333	3488			3313.6
7.0416	3491			3316.45
7.05	3492			3317.4
7.0583	3495			3320.25
7.0666	3498			3323.1
7.075	3503			3327.85
7.0833	3503			3327.85
7.0916	3505			3329.75
7.1	3507			3331.65
7.1083	3509			3333.55
7.1166	3512			3336.4
7.125	3514			3338.3
7.1333	3515			3339.25
7.1416	3518			3342.1
7.15	3519			3343.05
7.1583	3521			3344.95
7.1666	3524			3347.8
7.175	3525			3348.75
7.1833	3527			3350.65
7.1916	3527			3350.65
7.2	3533			3356.35
7.2083	3533			3356.35
7.2166	3533			3356.35
7.225	3533			3356.35
7.2333	3535			3358.25
7.2416	3536			3359.2
7.25	3537			3360.15
7.2583	3539			3362.05
7.2666	3540			3363
7.275	3541			3363.95
7.2833	3542			3364.9
7.2916	3542			3364.9
7.3	3543			3365.85
7.3083	3545			3367.75
7.3166	3546			3368.7
7.325	3546			3368.7
7.3333	3547			3369.65
7.3416	3547			3369.65
7.35	3548			3370.6
7.3583	3549			3371.55
7.3666	3550			3372.5
7.375	3549			3371.55
7.3833	3552			3374.4
7.3916	3554			3376.3
7.4	3555			3377.25
7.4083	3557			3379.15
7.4166	3558			3380.1
7.425	3559			3381.05
7.4333	3560			3382
7.4416	3560			3382
7.45	3562			3383.9
7.4583	3563			3384.85
7.4666	3565			3386.75
7.475	3566			3387.7
7.4833	3567			3388.65
7.4916	3568			3389.6
7.5	3568			3389.6
7.5083	3571			3428.16
7.5166	3572			3429.12
7.525	3571			3428.16
7.5333	3570			3427.2
7.5416	3570			3427.2
7.55	3571			3428.16
7.5583	3570			3427.2
7.5666	3572			3429.12
7.575	3574			3431.04
7.5833	3574			3431.04
7.5916	3577			3433.92
7.6	3578			3434.88
7.6083	3580			3436.8
7.6166	3581			3437.76
7.625	3582			3438.72
7.6333	3583			3439.68
7.6416	3583			3439.68
7.65	3583			3439.68
7.6583	3584			3440.64
7.6666	3585			3441.6
7.675	3585			3441.6
7.6833	3579			3435.84
7.6916	3578			3434.88
7.7	3577			3433.92
7.7083	3575			3432
7.7166	3574			3431.04
7.725	3574			3431.04
7.7333	3574			3431.04
7.7416	3574			3431.04
7.75	3574			3431.04
7.7583	3575			3432
7.7666	3576			3432.96
7.775	3577			3433.92
7.7833	3578			3434.88
7.7916	3579			3435.84
7.8	3580			3436.8
7.8083	3580			3436.8
7.8166	3582			3438.72
7.825	3581			3437.76
7.8333	3580			3436.8
7.8416	3581			3437.76
7.85	3583			3439.68
7.8583	3584			3440.64
7.8666	3585			3441.6
7.875	3584			3440.64
7.8833	3582			3438.72

## Sheet: coated GFRP fixed with grout
displacement	Strain
	Head_grout	Mid1_grout	Mid2_grout	End_grout
0	0	0	0	0
0.0083	2	14	16	2
0.0166	4	22	26	4
0.025	6	28	35	6
0.0333	8	32	42	8
0.0416	10	36	48	10
0.05	14	40	55	11
0.0583	18	45	60	12
0.0666	23	49	65	15
0.075	25	53	70	20
0.0833	29	57	75	25
0.0916	31	60	80	31
0.1	35	64	84	35
0.1083	37	68	89	40
0.1166	42	73	94	45
0.125	43	76	98	51
0.1333	47	80	103	56
0.1416	49	84	108	61
0.15	53	87	112	66
0.1583	55	90	116	72
0.1666	59	94	121	77
0.175	60	97	126	82
0.1833	65	100	130	87
0.1916	67	104	135	92
0.2	71	107	140	96
0.2083	72	111	144	101
0.2166	76	114	148	108
0.225	79	118	152	114
0.2333	82	121	156	118
0.2416	84	124	161	123
0.25	86	128	165	130
0.2583	90	134	170	135
0.2666	92	138	174	141
0.275	95	144	177	147
0.2833	96	148	182	153
0.2916	101	153	186	157
0.3	102	157	190	162
0.3083	106	160	193	168
0.3166	107	164	198	173
0.325	109	167	202	178
0.3333	110	170	206	183
0.3416	115	174	210	189
0.35	118	177	214	192
0.3583	119	181	218	198
0.3666	122	184	223	203
0.375	124	187	226	208
0.3833	126	190	230	213
0.3916	128	193	234	217
0.4	131	196	238	222
0.4083	133	199	241	227
0.4166	136	201	245	233
0.425	138	204	248	237
0.4333	140	206	252	242
0.4416	144	209	256	247
0.45	145	212	260	252
0.4583	148	214	265	257
0.4666	151	217	268	262
0.475	152	219	272	266
0.4833	155	221	276	271
0.4916	157	224	280	276
0.5	161	227	283	281
0.5083	161	229	287	284
0.5166	162	232	290	289
0.525	163	235	294	294
0.5333	167	237	296	299
0.5416	168	240	300	303
0.55	170	243	303	309
0.5583	173	245	307	313
0.5666	175	248	310	318
0.575	179	250	313	321
0.5833	181	253	316	326
0.5916	184	255	320	331
0.6	186	257	323	336
0.6083	190	260	326	340
0.6166	191	262	329	345
0.625	194	264	332	346
0.6333	197	266	335	349
0.6416	199	269	338	353
0.65	202	271	342	357
0.6583	205	273	346	362
0.6666	205	275	349	365
0.675	209	277	352	369
0.6833	212	279	355	374
0.6916	214	281	358	378
0.7	216	282	361	382
0.7083	220	284	364	386
0.7166	221	287	368	390
0.725	252	288	372	395
0.7333	257	291	375	398
0.7416	264	293	378	403
0.75	268	295	381	403
0.7583	271	297	385	403
0.7666	278	299	388	405
0.775	283	301	392	407
0.7833	289	302	395	409
0.7916	296	306	398	410
0.8	300	310	401	414
0.8083	305	314	404	416
0.8166	310	318	407	417
0.825	316	322	409	418
0.8333	319	326	411	423
0.8416	324	330	413	426
0.85	329	334	415	428
0.8583	332	338	417	430
0.8666	336	342	419	433
0.875	340	346	421	435
0.8833	344	350	424	438
0.8916	347	354	426	441
0.9	352	355	429	444
0.9083	355	350	431	448
0.9166	360	355	434	451
0.925	361	360	436	453
0.9333	367	365	438	456
0.9416	371	361	440	459
0.95	374	363	443	462
0.9583	378	365	445	464
0.9666	382	367	447	468
0.975	385	369	449	470
0.9833	390	371	452	474
0.9916	392	373	455	476
1	397	375	458	479
1.0083	398	377	461	484
1.0166	402	379	463	486
1.025	404	381	466	489
1.0333	409	383	468	491
1.0416	412	385	471	494
1.05	415	387	473	497
1.0583	419	389	476	501
1.0666	421	391	478	504
1.075	425	393	480	507
1.0833	427	395	482	511
1.0916	431	397	485	514
1.1	436	399	487	518
1.1083	439	401	489	520
1.1166	442	401	491	524
1.125	445	400	494	527
1.1333	449	398	497	531
1.1416	452	424	499	534
1.15	455	426	501	539
1.1583	458	428	504	542
1.1666	461	430	506	546
1.175	466	431	508	550
1.1833	468	434	510	553
1.1916	473	436	512	557
1.2	475	437	514	560
1.2083	476	439	517	564
1.2166	482	441	519	569
1.225	485	442	520	573
1.2333	487	444	522	576
1.2416	492	445	524	580
1.25	493	447	526	583
1.2583	497	449	528	586
1.2666	500	451	530	591
1.275	503	452	532	594
1.2833	506	454	534	598
1.2916	510	456	536	601
1.3	514	460	541	604
1.3083	516	462	543	608
1.3166	520	463	545	611
1.325	523	465	547	615
1.3333	527	467	549	621
1.3416	529	469	551	622
1.35	533	470	553	627
1.3583	535	472	555	630
1.3666	538	473	557	634
1.375	540	475	558	637
1.3833	544	477	561	639
1.3916	548	478	562	643
1.4	551	479	564	647
1.4083	553	481	566	650
1.4166	557	483	568	654
1.425	558	485	570	657
1.4333	563	486	572	660
1.4416	565	488	574	664
1.45	568	489	576	668
1.4583	571	490	577	670
1.4666	575	492	579	673
1.475	577	493	580	677
1.4833	580	495	582	680
1.4916	583	496	584	684
1.5	586	498	586	687
1.5083	589	499	587	689
1.5166	592	500	589	694
1.525	595	502	590	697
1.5333	599	503	592	699
1.5416	602	505	594	703
1.55	605	506	595	705
1.5583	607	508	597	708
1.5666	611	509	599	710
1.575	614	510	600	714
1.5833	616	512	602	717
1.5916	619	513	604	720
1.6	622	514	604	724
1.6083	620	515	606	726
1.6166	677	517	608	729
1.625	682	519	610	732
1.6333	691	520	612	736
1.6416	695	521	613	758
1.65	699	522	614	759
1.6583	704	524	616	760
1.6666	709	525	618	761
1.675	713	526	619	762
1.6833	716	528	621	763
1.6916	719	529	623	764
1.7	726	531	624	765
1.7083	730	532	626	767
1.7166	734	533	628	768
1.725	738	534	629	769
1.7333	742	536	630	770
1.7416	746	537	632	772
1.75	751	538	633	773
1.7583	755	540	635	777
1.7666	759	541	636	781
1.775	763	542	638	785
1.7833	768	544	640	790
1.7916	771	545	642	795
1.8	776	551	648	799
1.8083	780	553	651	803
1.8166	784	554	652	808
1.825	788	555	653	812
1.8333	790	555	653	817
1.8416	796	556	654	821
1.85	799	557	655	825
1.8583	804	558	656	829
1.8666	808	559	657	832
1.875	811	560	658	838
1.8833	815	560	659	841
1.8916	819	561	660	846
1.9	823	562	661	851
1.9083	827	562	661	854
1.9166	830	562	661	858
1.925	834	562	661	862
1.9333	837	562	662	866
1.9416	842	563	662	871
1.95	844	563	662	874
1.9583	849	565	663	878
1.9666	853	570	664	881
1.975	855	575	664	886
1.9833	859	585	663	888
1.9916	864	590	662	894
2	865	594	660	898
2.0083	870	594	660	900
2.0166	873	594	660	904
2.025	877	594	660	909
2.0333	881	590	655	911
2.0416	884	587	652	916
2.05	887	586	651	919
2.0583	890	584	649	923
2.0666	895	584	649	927
2.075	898	584	648	931
2.0833	902	585	650	934
2.0916	905	585	650	937
2.1	907	585	650	942
2.1083	911	586	651	945
2.1166	914	586	651	949
2.125	919	587	652	953
2.1333	922	587	652	955
2.1416	923	588	654	959
2.15	928	589	654	962
2.1583	931	590	655	967
2.1666	935	590	655	970
2.175	938	591	656	972
2.1833	941	591	657	977
2.1916	944	592	658	980
2.2	947	592	658	984
2.2083	950	593	659	987
2.2166	954	594	660	991
2.225	958	595	661	994
2.2333	960	596	662	997
2.2416	964	597	663	1000
2.25	967	598	664	1004
2.2583	971	599	665	1008
2.2666	974	600	666	1011
2.275	977	600	667	1015
2.2833	979	602	668	1018
2.2916	983	602	669	1022
2.3	986	603	670	1025
2.3083	989	604	671	1028
2.3166	993	606	673	1031
2.325	995	607	674	1035
2.3333	997	608	676	1038
2.3416	999	609	677	1041
2.35	1002	610	678	1045
2.3583	1006	611	679	1047
2.3666	1009	612	680	1049
2.375	1010	613	682	1052
2.3833	1012	614	682	1055
2.3916	1016	615	683	1059
2.4	1019	617	685	1062
2.4083	1021	618	686	1063
2.4166	1023	618	687	1065
2.425	1027	620	688	1069
2.4333	1030	620	689	1073
2.4416	1032	621	690	1075
2.45	1035	622	691	1077
2.4583	1037	623	692	1081
2.4666	1038	624	693	1084
2.475	1040	625	694	1086
2.4833	1043	625	695	1089
2.4916	1047	626	696	1092
2.5	1049	627	697	1093
2.5083	1052	628	698	1095
2.5166	1055	628	698	1098
2.525	1056	629	699	1102
2.5333	1058	630	700	1104
2.5416	1061	631	701	1107
2.55	1063	632	702	1110
2.5583	1066	633	703	1112
2.5666	1068	633	703	1114
2.575	1072	634	704	1117
2.5833	1073	634	705	1119
2.5916	1076	635	706	1122
2.6	1078	636	707	1124
2.6083	1080	637	708	1128
2.6166	1082	638	708	1129
2.625	1084	638	709	1133
2.6333	1086	639	710	1135
2.6416	1089	639	710	1137
2.65	1091	640	712	1139
2.6583	1093	641	712	1141
2.6666	1096	642	714	1143
2.675	1099	643	714	1146
2.6833	1101	644	715	1148
2.6916	1104	644	716	1151
2.7	1106	645	717	1154
2.7083	1109	646	718	1157
2.7166	1111	647	718	1159
2.725	1113	647	719	1162
2.7333	1115	648	720	1164
2.7416	1118	649	721	1167
2.75	1121	649	721	1169
2.7583	1124	650	722	1172
2.7666	1126	651	724	1174
2.775	1127	652	724	1177
2.7833	1129	653	725	1180
2.7916	1131	653	726	1183
2.8	1133	654	726	1185
2.8083	1136	655	728	1186
2.8166	1138	656	728	1188
2.825	1141	656	729	1191
2.8333	1144	657	730	1193
2.8416	1146	657	730	1196
2.85	1149	658	731	1198
2.8583	1150	659	732	1201
2.8666	1152	660	733	1204
2.875	1154	660	734	1206
2.8833	1157	661	734	1209
2.8916	1160	661	735	1211
2.9	1162	662	736	1213
2.9083	1165	662	736	1215
2.9166	1165	663	737	1218
2.925	1167	664	738	1221
2.9333	1169	665	739	1223
2.9416	1172	665	739	1226
2.95	1174	666	740	1226
2.9583	1177	667	741	1228
2.9666	1179	668	742	1231
2.975	1182	669	743	1234
2.9833	1184	669	744	1236
2.9916	1186	670	744	1239
3	1188	671	745	1241
3.0083	1190	671	746	1244
3.0166	1192	672	746	1246
3.025	1195	672	747	1248
3.0333	1197	674	748	1251
3.0416	1200	674	749	1253
3.05	1201	674	749	1255
3.0583	1204	675	750	1258
3.0666	1207	675	750	1260
3.075	1208	675	750	1263
3.0833	1211	676	751	1264
3.0916	1213	676	751	1267
3.1	1215	675	750	1271
3.1083	1218	676	751	1272
3.1166	1220	676	751	1275
3.125	1223	676	752	1277
3.1333	1226	677	752	1279
3.1416	1226	677	752	1282
3.15	1229	677	752	1284
3.1583	1231	676	752	1287
3.1666	1234	677	749	1290
3.175	1236	679	749	1291
3.1833	1238	680	748	1294
3.1916	1241	682	746	1296
3.2	1243	683	741	1299
3.2083	1245	685	704	1301
3.2166	1248	686		1303
3.225	1251	688		1306
3.2333	1254	689		1308
3.2416	1257	691		1311
3.25	1259	693		1314
3.2583	1262	696		1317
3.2666	1264	697		1320
3.275	1265	700		1323
3.2833	1268	702		1325
3.2916	1271	707		1328
3.3	1273	711		1330
3.3083	1276	715		1332
3.3166	1279	718		1335
3.325	1281	720		1338
3.3333	1283	722		1340
3.3416	1285	726		1343
3.35	1288	728		1346
3.3583	1291	730		1348
3.3666	1293	732		1351
3.375	1296	734		1353
3.3833	1300	736		1356
3.3916	1302	738		1359
3.4	1303	740		1361
3.4083	1306	741		1364
3.4166	1308	743		1368
3.425	1315	744		1370
3.4333	1320	746		1372
3.4416	1325	748		1375
3.45	1330	750		1372
3.4583	1332	751		1373
3.4666	1335	752		1375
3.475	1338	754		1388
3.4833	1345	755		1419
3.4916	1348	758		1429
3.5	1358	759		1435
3.5083	1368	761		1440
3.5166	1369	762		1445
3.525	1370	764		1449
3.5333	1370	766		1453
3.5416	1371	767		1458
3.55	1374	768		1462
3.5583	1377	770		1467
3.5666	1380	772		1470
3.575	1383	773		1474
3.5833	1385	774		1477
3.5916	1388	776		1481
3.6	1391	777		1484
3.6083	1395	778		1487
3.6166	1397	780		1489
3.625	1399	780		1493
3.6333	1402	782		1496
3.6416	1402	783		1500
3.65	1404	785		1502
3.6583	1403	786		1504
3.6666	1405	788		1507
3.675	1408	789		1508
3.6833	1409	791		1510
3.6916	1410	792		1509
3.7	1411	792		1511
3.7083	1414			1514
3.7166	1415			1515
3.725	1416			1516
3.7333	1418			1517
3.7416	1420			1520
3.75	1421			1521
3.7583	1424			1523
3.7666	1425			1525
3.775	1428			1527
3.7833	1428			1528
3.7916	1431			1531
3.8	1432			1532
3.8083	1435			1535
3.8166	1436			1536
3.825	1438			1539
3.8333	1441			1540
3.8416	1441			1543
3.85	1442			1544
3.8583	1444			1546
3.8666	1446			1549
3.875	1448			1549
3.8833	1450			1551
3.8916	1452			1553
3.9	1454			1555
3.9083	1456			1557
3.9166	1457			1559
3.925	1459			1561
3.9333	1460			1563
3.9416	1461			1566
3.95	1464			1567
3.9583	1465			1569
3.9666	1467			1570
3.975	1468			1571
3.9833	1470			1574
3.9916	1472			1575
4	1473			1577
4.0083	1475			1579
4.0166	1476			1581
4.025	1477			1583
4.0333	1478			1584
4.0416	1479			1586
4.05	1481			1587
4.0583	1483			1588
4.0666	1483			1589
4.075	1486			1590
4.0833	1487			1593
4.0916	1490			1595
4.1	1491			1595
4.1083	1492			1598
4.1166	1494			1599
4.125	1496			1602
4.1333	1497			1603
4.1416	1499			1604
4.15	1500			1606
4.1583	1502			1609
4.1666	1505			1610
4.175	1506			1612
4.1833	1508			1613
4.1916	1508			1615
4.2	1510			1618
4.2083	1512			1619
4.2166	1513			1621
4.225	1516			1621
4.2333	1517			1624
4.2416	1519			1626
4.25	1521			1627
4.2583	1521			1630
4.2666	1522			1631
4.275	1523			1633
4.2833	1525			1635
4.2916	1527			1636
4.3	1529			1637
4.3083	1531			1638
4.3166	1533			1640
4.325	1534			1642
4.3333	1535			1644
4.3416	1537			1646
4.35	1538			1648
4.3583	1540			1649
4.3666	1541			1650
4.375	1542			1653
4.3833	1544			1654
4.3916	1545			1656
4.4	1546			1657
4.4083	1548			1658
4.4166	1548			1660
4.425	1550			1661
4.4333	1551			1662
4.4416	1552			1664
4.45	1554			1665
4.4583	1556			1667
4.4666	1557			1668
4.475	1559			1669
4.4833	1561			1671
4.4916	1561			1673
4.5	1562			1674
4.5083	1563			1676
4.5166	1564			1678
4.525	1566			1679
4.5333	1568			1680
4.5416	1569			1681
4.55	1570			1682
4.5583	1573			1684
4.5666	1574			1686
4.575	1575			1687
4.5833	1575			1688
4.5916	1578			1691
4.6	1578			1692
4.6083	1580			1694
4.6166	1582			1694
4.625	1584			1697
4.6333	1584			1697
4.6416	1586			1699
4.65	1595			1701
4.6583	1599			1703
4.6666	1601			1703
4.675	1603			1705
4.6833	1605			1715
4.6916	1609			1719
4.7	1614			1722
4.7083	1618			1724
4.7166	1620			1726
4.725	1623			1730
4.7333	1626			1735
4.7416	1628			1740
4.75	1631			1742
4.7583	1633			1745
4.7666	1634			1748
4.775	1636			1750
4.7833	1638			1754
4.7916	1641			1756
4.8	1641			1757
4.8083	1642			1759
4.8166	1644			1761
4.825	1645			1764
4.8333	1647			1765
4.8416	1649			1766
4.85	1651			1768
4.8583	1653			1769
4.8666	1654			1771
4.875	1655			1773
4.8833	1657			1775
4.8916	1659			1777
4.9	1660			1778
4.9083	1662			1780
4.9166	1663			1782
4.925	1663			1784
4.9333	1665			1785
4.9416	1665			1787
4.95	1667			1788
4.9583	1667			1788
4.9666	1669			1790
4.975	1670			1790
4.9833	1672			1793
4.9916	1673			1793
5	1675			1795
5.0083	1676			1796
5.0166	1677			1798
5.025	1678			1799
5.0333	1678			1801
5.0416	1681			1802
5.05	1681			1803
5.0583	1682			1804
5.0666	1684			1804
5.075	1686			1807
5.0833	1687			1808
5.0916	1687			1809
5.1	1689			1811
5.1083	1690			1813
5.1166	1690			1814
5.125	1691			1814
5.1333	1693			1816
5.1416	1694			1817
5.15	1694			1817
5.1583	1696			1818
5.1666	1696			1820
5.175	1697			1821
5.1833	1699			1821
5.1916	1700			1824
5.2	1700			1824
5.2083	1702			1825
5.2166	1703			1827
5.225	1704			1828
5.2333	1704			1828
5.2416	1707			1830
5.25	1707			1831
5.2583	1708			1832
5.2666	1708			1832
5.275	1710			1835
5.2833	1711			1836
5.2916	1711			1837
5.3	1712			1837
5.3083	1713			1839
5.3166	1715			1840
5.325	1717			1840
5.3333	1719			1841
5.3416	1720			1842
5.35	1721			1844
5.3583	1721			1846
5.3666	1722			1848
5.375	1723			1849
5.3833	1725			1850
5.3916	1725			1851
5.4	1726			1852
5.4083	1727			1853
5.4166	1728			1855
5.425	1731			1855
5.4333	1731			1856
5.4416	1733			1857
5.45	1734			1858
5.4583	1735			1861
5.4666	1736			1861
5.475	1737			1863
5.4833	1738			1865
5.4916	1739			1866
5.5	1740			1867
5.5083	1742			1868
5.5166	1744			1869
5.525	1745			1870
5.5333	1746			1871
5.5416	1747			1873
5.55	1749			1875
5.5583	1750			1876
5.5666	1752			1877
5.575	1753			1879
5.5833	1754			1881
5.5916	1755			1882
5.6	1757			1884
5.6083	1757			1885
5.6166	1758			1886
5.625	1759			1887
5.6333	1760			1889
5.6416	1761			1889
5.65	1763			1890
5.6583	1764			1891
5.6666	1765			1893
5.675	1767			1894
5.6833	1767			1896
5.6916	1769			1897
5.7	1770			1898
5.7083	1771			1900
5.7166	1771			1900
5.725	1774			1902
5.7333	1774			1903
5.7416	1775			1904
5.75	1777			1904
5.7583	1779			1907
5.7666	1780			1908
5.775	1782			1909
5.7833	1782			1911
5.7916	1784			1913
5.8	1785			1914
5.8083	1785			1916
5.8166	1787			1916
5.825	1787			1918
5.8333	1788			1919
5.8416	1789			1919
5.85	1791			1921
5.8583	1792			1922
5.8666	1793			1923
5.875	1795			1924
5.8833	1795			1926
5.8916	1796			1927
5.9	1797			1928
5.9083	1796			1930
5.9166	1798			1930
5.925	1799			1931
5.9333	1800			1932
5.9416	1800			1931
5.95	1801			1933
5.9583	1801			1934
5.9666	1802			1935
5.975	1803			1936
5.9833	1804			1937
5.9916	1805			1937
6	1806			1938
6.0083	1807			1939
6.0166	1808			1940
6.025	1809			1941
6.0333	1807			1942
6.0416	1810			1943
6.05	1811			1944
6.0583	1812			1945
6.0666	1812			1943
6.075	1812			1946
6.0833	1813			1947
6.0916	1813			1948
6.1	1812			1948
6.1083	1812			1948
6.1166	1810			1949
6.125	1811			1949
6.1333	1811			1948
6.1416	1811			1948
6.15	1812			1946
6.1583	1811			1947
6.1666	1811			1947
6.175	1813			1947
6.1833	1813			1948
6.1916	1814			1947
6.2	1814			1947
6.2083	1813			1949
6.2166	1814			1949
6.225	1815			1950
6.2333	1815			1950
6.2416	1816			1949
6.25	1817			1951
6.2583	1818			1952
6.2666	1819			1952
6.275	1819			1953
6.2833	1820			1954
6.2916	1821			1955
6.3	1822			1956
6.3083	1823			1956
6.3166	1824			1957
6.325	1825			1958
6.3333	1827			1959
6.3416	1827			1960
6.35	1827			1961
6.3583	1827			1962
6.3666	1828			1964
6.375	1830			1964
6.3833	1829			1964
6.3916	1832			1965
6.4	1833			1966
6.4083	1834			1968
6.4166	1835			1967
6.425	1835			1970
6.4333	1837			1971
6.4416	1838			1972
6.45	1839			1973
6.4583	1840			1973
6.4666	1841			1975
6.475	1842			1976
6.4833	1844			1977
6.4916	1845			1978
6.5	1846			1980
6.5083	1846			1981
6.5166	1848			1983
6.525	1850			1984
6.5333	1850			1985
6.5416	1852			1985
6.55	1853			1987
6.5583	1853			1989
6.5666	1854			1989
6.575	1855			1991
6.5833	1855			1992
6.5916	1857			1993
6.6	1858			1994
6.6083	1859			1995
6.6166	1860			1995
6.625	1861			1997
6.6333	1862			1998
6.6416	1863			1999
6.65	1864			2000
6.6583	1864			2001
6.6666	1865			2002
6.675	1867			2003
6.6833	1868			2004
6.6916	1869			2004
6.7	1871			2005
6.7083	1872			2007
6.7166	1873			2009
6.725	1875			2010
6.7333	1875			2012
6.7416	1876			2013
6.75	1875			2014
6.7583	1876			2016
6.7666	1878			2016
6.775	1879			2017
6.7833	1880			2016
6.7916	1880			2017
6.8	1881			2019
6.8083	1882			2020
6.8166	1883			2021
6.825	1883			2022
6.8333	1884			2023
6.8416	1885			2024
6.85	1887			2025
6.8583	1888			2025
6.8666	1889			2026
6.875	1890			2027
6.8833	1892			2029
6.8916	1893			2030
6.9	1894			2031
6.9083	1893			2032
6.9166	1895			2034
6.925	1897			2035
6.9333	1899			2037
6.9416	1900			2036
6.95	1900			2038
6.9583	1901			2040
6.9666	1902			2042
6.975	1904			2043
6.9833	1905			2043
6.9916	1906			2044
7	1907			2045
7.0083	1907			2047
7.0166	1907			2048
7.025	1909			2049
7.0333	1912			2051
7.0416	1911			2051
7.05	1913			2051
7.0583	1913			2053
7.0666	1915			2056
7.075	1915			2055
7.0833	1915			2057
7.0916	1915			2057
7.1	1916			2059
7.1083	1917			2059
7.1166	1917			2059
7.125	1917			2059
7.1333	1919			2060
7.1416	1918			2061
7.15	1919			2061
7.1583	1919			2061
7.1666	1920			2063
7.175	1920			2062
7.1833	1921			2063
7.1916	1921			2063
7.2	1922			2065
7.2083	1922			2064
7.2166	1922			2066
7.225	1924			2066
7.2333	1924			2067
7.2416	1926			2067
7.25	1926			2067
7.2583	1928			2069
7.2666	1927			2069
7.275	1928			2071
7.2833	1928			2071
7.2916	1929			2073
7.3	1931			2072
7.3083	1930			2073
7.3166	1931			2073
7.325	1932			2074
7.3333	1933			2076
7.3416	1932			2075
7.35	1933			2076
7.3583	1933			2077
7.3666	1933			2078
7.375	1933			2077
7.3833	1933			2079
7.3916	1933			2078
7.4	1933			2078
7.4083	1934			2079
7.4166	1934			2079
7.425	1933			2078
7.4333	1934			2078
7.4416	1934			2080
7.45	1933			2080
7.4583	1933			2079
7.4666	1934			2080
7.475	1934			2080
7.4833	1933			2078
7.4916	1935			2078
7.5	1936			2080
7.5083	1935			2080
7.5166	1935			2079
7.525	1936			2081
7.5333	1938			2082
7.5416	1938			2081
7.55	1938			2081
7.5583	1939			2082
7.5666	1940			2084
7.575	1940			2084
7.5833	1941			2084
7.5916	1941			2085
7.6	1943			2086
7.6083	1944			2086
7.6166	1945			2087
7.625	1944			2087
7.6333	1945			2089
7.6416	1946			2090
7.65	1947			2091
7.6583	1947			2090
7.6666	1948			2091
7.675	1949			2093
7.6833	1950			2094
7.6916	1951			2094
7.7	1951			2095
7.7083	1952			2096
7.7166	1953			2097
7.725	1955			2098
7.7333	1954			2098
7.7416	1955			2099
7.75	1956			2100
7.7583	1957			2102
7.7666	1958			2101
7.775	1958			2102
7.7833	1959			2103
7.7916	1960			2104
7.8	1960			2105
7.8083	1960			2105
7.8166	1961			2106
7.825	1963			2107
7.8333	1963			2108
7.8416	1964			2108
7.85	1964			2109
7.8583	1965			2111
7.8666	1966			2111
7.875	1967			2112
7.8833	1967			2112
7.8916	1968			2113
7.9	1969			2114
7.9083	1970			2115
7.9166	1971			2115
7.925	1971			2116
7.9333	1973			2117
7.9416	1972			2118
7.95	1974			2119
7.9583	1973			2119
7.9666	1975			2121
7.975	1976			2120
7.9833	1977			2123
7.9916	1977			2122
8	1979			2124
8.0083	1979			2125
8.0166	1980			2126
8.025	1980			2126
8.0333	1982			2128
8.0416	1982			2128
8.05	1983			2129
8.0583	1985			2129
8.0666	1985			2131
8.075	1986			2131
8.0833	1986			2132
8.0916	1987			2134
8.1	1987			2134
8.1083	1988			2135
8.1166	1990			2136
8.125	1991			2137
8.1333	1991			2137
8.1416	1992			2138
8.15	1992			2140
8.1583	1994			2141
8.1666	1994			2141
8.175	1994			2142
8.1833	1995			2142
8.1916	1996			2144
8.2	1998			2144
8.2083	1998			2144
8.2166	2000			2145
8.225	2000			2146
8.2333	2001			2148
8.2416	2003			2148
8.25	2002			2150
8.2583	2004			2151
8.2666	2005			2152
8.275	2006			2154
8.2833	2005			2153
8.2916	2006			2155
8.3	2008			2156
8.3083	2008			2157
8.3166	2010			2156
8.325	2010			2157
8.3333	2011			2159
8.3416	2013			2159
8.35	2013			2161
8.3583	2013			2161
8.3666	2014			2162
8.375	2014			2164
8.3833	2016			2165
8.3916	2017			2165
8.4	2017			2166
8.4083	2018			2166
8.4166	2019			2168
8.425	2020			2169
8.4333	2020			2169
8.4416	2020			2170
8.45	2022			2171
8.4583	2023			2172
8.4666	2024			2172
8.475	2024			2172
8.4833	2025			2174
8.4916	2026			2175
8.5	2026			2176
8.5083	2026			2176
8.5166	2028			2177
8.525	2029			2179
8.5333	2029			2179
8.5416	2030			2179
8.55	2031			2181
8.5583	2032			2182
8.5666	2033			2182
8.575	2033			2183
8.5833	2034			2184
8.5916	2035			2185
8.6	2035			2186
8.6083	2036			2186
8.6166	2037			2187
8.625	2038			2188
8.6333	2039			2188
8.6416	2039			2189
8.65	2039			2190
8.6583	2040			2191
8.6666	2041			2192
8.675	2041			2192
8.6833	2044			2193
8.6916	2044			2194
8.7	2045			2195
8.7083	2044			2195
8.7166	2047			2198
8.725	2047			2198
8.7333	2047			2199
8.7416	2048			2198
8.75	2050			2201
8.7583	2050			2201
8.7666	2051			2201
8.775	2051			2202
8.7833	2052			2204
8.7916	2053			2204
8.8	2054			2205
8.8083	2055			2205
8.8166	2056			2206
8.825	2056			2208
8.8333	2057			2209
8.8416	2058			2210
8.85	2059			2211
8.8583	2060			2211
8.8666	2056			2212
8.875	2057			2213
8.8833	2058			2214
8.8916	2059			2215
8.9	2060			2211
8.9083				2212
8.9166				2213
8.925				2214
8.9333				2215
8.9416
8.95
8.9583
8.9666
8.975
8.9833
8.9916
9
9.0083
9.0166
9.025
9.0333
9.0416
9.05
9.0583
9.0666
9.075
9.0833
9.0916
9.1
9.1083
9.1166
9.125
9.1333
9.1416
9.15
9.1583
9.1666
9.175
9.1833
9.1916
9.2
9.2083
9.2166
9.225
9.2333
9.2416
9.25
9.2583
9.2666
9.275
9.2833
9.2916
9.3
9.3083
9.3166
9.325
9.3333
9.3416
9.35
9.3583
9.3666
9.375
9.3833
9.3916
9.4
9.4083
9.4166
9.425
9.4333
9.4416
9.45
9.4583
9.4666
9.475
9.4833
9.4916
9.5
9.5083
9.5166
9.525
9.5333
9.5416
9.55
9.5583
9.5666
9.575
9.5833
9.5916
9.6
9.6083
9.6166
9.625
9.6333
9.6416
9.65
9.6583
9.6666
9.675
9.6833
9.6916
9.7
9.7083
9.7166
9.725
9.7333
9.7416
9.75
9.7583
9.7666
9.775
9.7833
9.7916
9.8
9.8083
9.8166
9.825
9.8333
9.8416
9.85
9.8583
9.8666
9.875
9.8833
9.8916
9.9
9.9083
9.9166
9.925
9.9333
9.9416
9.95
9.9583
9.9666
9.975
9.9833
9.9916
10
10.0083
10.0166
10.025
10.0333
10.0416
10.05
10.0583
10.0666
10.075
10.0833
10.0916
10.1
10.1083
10.1166
10.125
10.1333
10.1416
10.15
10.1583
10.1666
10.175
10.1833
10.1916
10.2
10.2083
10.2166
10.225
10.2333
10.2416
10.25
10.2583
10.2666
10.275
10.2833
10.2916
10.3
10.3083
10.3166
10.325
10.3333
10.3416
10.35
10.3583
10.3666
10.375
10.3833
10.3916
10.4
10.4083
10.4166
10.425
10.4333
10.4416
10.45
10.4583
10.4666
10.475
10.4833
10.4916
10.5
10.5083
10.5166
10.525
10.5333
10.5416
10.55
10.5583
10.5666
10.575
10.5833
10.5916
10.6
10.6083
10.6166
10.625
10.6333
10.6416
10.65
10.6583
10.6666
10.675
10.6833
10.6916
10.7
10.7083
10.7166
10.725
10.7333
10.7416
10.75
10.7583
10.7666
10.775
10.7833
10.7916
10.8
10.8083
10.8166
10.825
10.8333
10.8416
10.85
10.8583
10.8666
10.875
10.8833
10.8916
10.9
10.9083
10.9166
10.925
10.9333
10.9416
10.95
10.9583
10.9666
10.975
10.9833
10.9916
11
11.0083
11.0166
11.025
11.0333
11.0416
11.05
11.0583
11.0666
11.075
11.0833
11.0916
11.1
11.1083
11.1166
11.125
11.1333
11.1416
11.15
11.1583
11.1666
11.175
11.1833
11.1916
11.2
11.2083
11.2166
11.225
11.2333
11.2416
11.25
11.2583
11.2666
11.275
11.2833
11.2916
11.3
11.3083
11.3166
11.325
11.3333
11.3416
11.35
11.3583
11.3666
11.375
11.3833
11.3916
11.4
11.4083
11.4166
11.425
11.4333
11.4416
11.45
11.4583
11.4666
11.475
11.4833
11.4916
11.5
11.5083
11.5166
11.525
11.5333
11.5416
11.55
11.5583
11.5666
11.575
11.5833
11.5916
11.6
11.6083
11.6166
11.625
11.6333
11.6416
11.65
11.6583
11.6666
11.675
11.6833
11.6916
11.7
11.7083
11.7166
11.725
11.7333
11.7416
11.75
11.7583
11.7666
11.775
11.7833
11.7916
11.8
11.8083
11.8166
11.825
11.8333
11.8416
11.85
11.8583
11.8666
11.875
11.8833
11.8916
11.9
11.9083
11.9166
11.925
11.9333
11.9416
11.95
11.9583
11.9666
11.975
11.9833
11.9916
12
12.0083
12.0166
12.025
12.0333
12.0416
12.05
12.0583
12.0666
12.075
12.0833
12.0916
12.1
12.1083
12.1166
12.125
12.1333
12.1416
12.15
12.1583
12.1666
12.175
12.1833
12.1916
12.2
12.2083
12.2166
12.225
12.2333
12.2416
12.25
12.2583
12.2666
12.275
12.2833
12.2916
12.3
12.3083
12.3166
12.325
12.3333
12.3416
12.35
12.3583
12.3666
12.375
12.3833
12.3916
12.4
12.4083
12.4166
12.425
12.4333
12.4416
12.45
12.4583
12.4666
12.475
12.4833
12.4916
12.5
12.5083
12.5166
12.525
12.5333
12.5416
12.55
12.5583
12.5666
12.575
12.5833
12.5916
12.6
12.6083
12.6166
12.625
12.6333
12.6416
12.65
12.6583
12.6666
12.675
12.6833
12.6916
12.7
12.7083
12.7166
12.725
12.7333
12.7416
12.75
12.7583
12.7666
12.775
12.7833
12.7916
12.8
12.8083
12.8166
12.825
12.8333
12.8416
12.85
12.8583
12.8666
12.875
12.8833
12.8916
12.9
12.9083
12.9166
12.925
12.9333
12.9416
12.95
12.9583
12.9666
12.975
12.9833
12.9916
13
13.0083
13.0166
13.025
13.0333
13.0416
13.05
13.0583
13.0666
13.075
13.0833
13.0916
13.1
13.1083
13.1166
13.125
13.1333
13.1416
13.15
13.1583
13.1666
13.175
13.1833
13.1916
13.2
13.2083
13.2166
13.225
13.2333
13.2416
13.25
13.2583
13.2666
13.275
13.2833
13.2916
13.3
13.3083
13.3166
13.325
13.3333
13.3416
13.35
13.3583
13.3666
13.375
13.3833
13.3916
13.4
13.4083
13.4166
13.425
13.4333
13.4416
13.45
13.4583
13.4666
13.475
13.4833
13.4916
13.5
13.5083
13.5166
13.525
13.5333
13.5416
13.55
13.5583
13.5666
13.575
13.5833
13.5916
13.6
13.6083
13.6166
13.625
13.6333
13.6416
13.65
13.6583
13.6666
13.675
13.6833
13.6916
13.7
13.7083
13.7166
13.725
13.7333
13.7416
13.75
13.7583
13.7666
13.775
13.7833
13.7916
13.8
13.8083
13.8166
13.825
13.8333
13.8416
13.85
13.8583
13.8666
13.875
13.8833
13.8916
13.9
13.9083
13.9166
13.925
13.9333
13.9416
13.95
13.9583
13.9666
13.975
13.9833
13.9916
14
14.0083
14.0166
14.025
14.0333
14.0416
14.05
14.0583
14.0666
14.075
14.0833
14.0916
14.1
14.1083
14.1166
14.125
14.1333
14.1416
14.15
14.1583
14.1666
14.175
14.1833
14.1916
14.2
14.2083
14.2166
14.225
14.2333
14.2416
14.25
14.2583
14.2666
14.275
14.2833
14.2916
14.3
14.3083
14.3166
14.325
14.3333
14.3416
14.35
14.3583
14.3666
14.375
14.3833
14.3916
14.4
14.4083
14.4166
14.425
14.4333
14.4416
14.45
14.4583
14.4666
14.475
14.4833
14.4916
14.5
14.5083
14.5166
14.525
14.5333
14.5416
14.55
14.5583
14.5666
14.575
14.5833
14.5916
14.6
14.6083
14.6166
14.625
14.6333
14.6416
14.65
14.6583
14.6666
14.675
14.6833
14.6916
14.7
14.7083
14.7166
14.725
14.7333
14.7416
14.75
14.7583
14.7666
14.775
14.7833
14.7916
14.8
14.8083
14.8166
14.825
14.8333
14.8416
14.85
14.8583
14.8666
14.875
14.8833
14.8916
14.9
14.9083
14.9166
14.925
14.9333
14.9416
14.95
14.9583
14.9666
14.975
14.9833
14.9916
15
15.0083
15.0166
15.025
15.0333
15.0416
15.05
15.0583
15.0666
15.075
15.0833
15.0916
15.1
15.1083
15.1166
15.125
15.1333
15.1416
15.15
15.1583
15.1666
15.175
15.1833
15.1916
15.2
15.2083
15.2166
15.225
15.2333
15.2416
15.25
15.2583
15.2666
15.275
15.2833
15.2916
15.3
15.3083
15.3166
15.325
15.3333
15.3416
15.35
15.3583
15.3666
15.375
15.3833
15.3916
15.4
15.4083
15.4166
15.425
15.4333
15.4416
15.45
15.4583
15.4666
15.475
15.4833
15.4916
15.5
15.5083
15.5166
15.525
15.5333
15.5416
15.55
15.5583
15.5666
15.575
15.5833
15.5916
15.6
15.6083
15.6166
15.625
15.6333
15.6416
15.65
15.6583
15.6666
15.675
15.6833
15.6916
15.7
15.7083
15.7166
15.725
15.7333
15.7416
15.75
15.7583
15.7666
15.775
15.7833
15.7916
15.8
15.8083
15.8166
15.825
15.8333
15.8416
15.85
15.8583
15.8666
15.875
15.8833
15.8916
15.9
15.9083
15.9166
15.925
15.9333
15.9416
15.95
15.9583
15.9666
15.975
15.9833
15.9916
16
16.0083
16.0166
16.025
16.0333
16.0416
16.05
16.0583
16.0666
16.075
16.0833
16.0916
16.1
16.1083
16.1166
16.125
16.1333
16.1416
16.15
16.1583
16.1666
16.175
16.1833
16.1916
16.2
16.2083
16.2166
16.225
16.2333
16.2416
16.25
16.2583
16.2666
16.275
16.2833
16.2916
16.3
16.3083
16.3166
16.325
16.3333
16.3416
16.35
16.3583
16.3666
16.375
16.3833
16.3916
16.4
16.4083
16.4166
16.425
16.4333
16.4416
16.45
16.4583
16.4666
16.475
16.4833
16.4916
16.5
16.5083
16.5166
16.525
16.5333
16.5416
16.55
16.5583
16.5666
16.575
16.5833
16.5916
16.6
16.6083
16.6166
16.625
16.6333
16.6416
[truncated: 722 more rows]

## Sheet: uncoated GFRP fixed with soil
displacement	Strain
	Head_grout	Mid1_grout	Mid2_grout	End_grout
0	0	0	0	0
0.0083	1	3	1	1
0.0166	2	6	3	1.9
0.025	4	10	4	3.8
0.0333	16	18	6	15.1
0.0416	26	30	12	24.5
0.05	36	40	16	33.9
0.0583	46	50	22	43.3
0.0666	56	58	26	52.7
0.075	64	64	36	60.2
0.0833	74	72	40	69.6
0.0916	82	78	46	77.1
0.1	90	84	52	84.6
0.1083	98	90	58	92.2
0.1166	106	96	64	99.7
0.125	116	102	68	109.1
0.1333	124	110	76	116.6
0.1416	114	104	70	107.2
0.15	120	108	70	112.8
0.1583	118	108	72	111
0.1666	122	112	74	114.7
0.175	132	118	80	124.1
0.1833	140	122	84	131.6
0.1916	146	128	90	137.3
0.2	154	134	96	144.8
0.2083	162	144	102	152.3
0.2166	170	150	106	159.8
0.225	180	156	112	171
0.2333	190	162	118	180.5
0.2416	198	172	124	188.1
0.25	206	176	126	195.7
0.2583	214	184	134	203.3
0.2666	224	192	142	212.8
0.275	234	198	148	222.3
0.2833	242	204	154	229.9
0.2916	252	212	158	239.4
0.3	264	222	166	250.8
0.3083	274	228	174	260.3
0.3166	282	234	180	267.9
0.325	292	244	188	277.4
0.3333	304	252	194	288.8
0.3416	314	260	202	298.3
0.35	324	268	206	307.8
0.3583	336	276	218	319.2
0.3666	344	282	222	326.8
0.375	354	290	228	336.3
0.3833	366	300	236	347.7
0.3916	378	308	244	359.1
0.4	386	316	250	366.7
0.4083	396	326	258	376.2
0.4166	408	334	264	387.6
0.425	418	340	272	397.1
0.4333	428	348	276	406.6
0.4416	440	356	284	418
0.45	452	366	294	429.4
0.4583	462	372	300	438.9
0.4666	474	382	310	450.3
0.475	486	390	314	461.7
0.4833	498	400	322	473.1
0.4916	510	410	330	484.5
0.5	520	418	338	494
0.5083	532	426	344	505.4
0.5166	542	434	352	514.9
0.525	558	444	360	530.1
0.5333	568	452	366	539.6
0.5416	580	462	374	551
0.55	592	468	382	562.4
0.5583	606	476	390	575.7
0.5666	616	486	396	579.1
0.575	628	494	402	590.4
0.5833	640	502	410	601.6
0.5916	652	512	418	612.9
0.6	664	520	426	624.2
0.6083	676	528	432	635.5
0.6166	690	538	438	648.6
0.625	704	546	446	661.8
0.6333	714	556	454	671.2
0.6416	728	564	462	684.4
0.65	738	572	468	693.8
0.6583	750	582	476	705
0.6666	764	592	484	718.2
0.675	776	600	490	729.5
0.6833	790	608	498	742.6
0.6916	804	616	506	755.8
0.7	818	626	516	769
0.7083	832	636	522	782.1
0.7166	842	644	530	791.5
0.725	856	654	538	804.7
0.7333	870	662	544	817.8
0.7416	884	672	554	831
0.75	898	680	560	844.2
0.7583	914	690	570	859.2
0.7666	928	700	578	872.4
0.775	940	708	586	883.6
0.7833	954	718	594	896.8
0.7916	968	728	602	910
0.8	984	738	610	925
0.8083	996	746	620	936.3
0.8166	1010	754	626	949.4
0.825	1024	762	634	962.6
0.8333	1040	774	642	977.6
0.8416	1052	780	648	988.9
0.85	1068	790	656	1004
0.8583	1084	800	666	1019
0.8666	1096	808	676	1030.3
0.875	1112	818	684	1045.3
0.8833	1124	826	692	1056.6
0.8916	1140	836	698	1071.6
0.9	1152	846	708	1082.9
0.9083	1170	854	716	1099.8
0.9166	1182	864	722	1111.1
0.925	1196	870	732	1124.3
0.9333	1210	880	740	1137.4
0.9416	1224	888	748	1150.6
0.95	1238	898	754	1163.8
0.9583	1254	906	762	1178.8
0.9666	1268	914	768	1192
0.975	1282	926	778	1205.1
0.9833	1298	934	788	1220.2
0.9916	1314	942	794	1235.2
1	1326	952	802	1246.5
1.0083	1342	960	810	1261.5
1.0166	1356	970	820	1274.7
1.025	1372	978	830	1289.7
1.0333	1388	988	838	1304.8
1.0416	1402	996	846	1317.9
1.05	1416	1006	854	1331.1
1.0583	1432	1014	862	1346.1
1.0666	1446	1022	872	1359.3
1.075	1464	1034	878	1376.2
1.0833	1476	1042	888	1387.5
1.0916	1492	1050	896	1402.5
1.1	1506	1060	906	1415.7
1.1083	1522	1070	914	1430.7
1.1166	1536	1078	922	1443.9
1.125	1552	1088	930	1458.9
1.1333	1568	1096	938	1474
1.1416	1580	1106	948	1485.2
1.15	1598	1116	958	1502.2
1.1583	1612	1124	966	1515.3
1.1666	1628	1132	972	1530.4
1.175	1642	1144	982	1543.5
1.1833	1658	1152	992	1558.6
1.1916	1672	1162	1000	1571.7
1.2	1686	1168	1008	1584.9
1.2083	1700	1180	1016	1598
1.2166	1718	1188	1024	1615
1.225	1728	1194	1032	1624.4
1.2333	1746	1206	1042	1641.3
1.2416	1758	1214	1050	1652.6
1.25	1774	1224	1058	1667.6
1.2583	1790	1232	1068	1682.6
1.2666	1804	1240	1076	1695.8
1.275	1818	1250	1084	1709
1.2833	1830	1260	1092	1720.2
1.2916	1848	1270	1100	1737.2
1.3	1862	1278	1110	1750.3
1.3083	1876	1286	1116	1763.5
1.3166	1890	1294	1126	1776.6
1.325	1906	1304	1136	1791.7
1.3333	1922	1314	1144	1806.7
1.3416	1936	1322	1154	1819.9
1.35	1952	1332	1160	1834.9
1.3583	1966	1340	1170	1848.1
1.3666	1982	1350	1180	1863.1
1.375	1994	1362	1190	1874.4
1.3833	2010	1370	1198	1889.4
1.3916	2024	1380	1206	1902.6
1.4	2038	1390	1216	1915.8
1.4083	2054	1400	1224	1930.8
1.4166	2068	1406	1234	1944
1.425	2084	1418	1244	1959
1.4333	2098	1426	1250	1972.2
1.4416	2112	1436	1260	1985.3
1.45	2128	1442	1268	2000.4
1.4583	2142	1456	1278	2013.5
1.4666	2158	1464	1284	2028.6
1.475	2170	1476	1294	2039.8
1.4833	2186	1484	1304	2054.9
1.4916	2202	1492	1314	2069.9
1.5	2216	1504	1324	2083.1
1.5083	2230	1510	1330	2096.2
1.5166	2244	1520	1340	2109.4
1.525	2256	1528	1350	2120.7
1.5333	2270	1538	1360	2133.8
1.5416	2286	1546	1368	2148.9
1.55	2300	1558	1378	2162
1.5583	2310	1566	1386	2171.4
1.5666	2324	1574	1392	2184.6
1.575	2342	1582	1404	2201.5
1.5833	2354	1592	1410	2212.8
1.5916	2368	1600	1420	2226
1.6	2382	1608	1430	2239.1
1.6083	2398	1618	1440	2254.2
1.6166	2410	1628	1448	2265.4
1.625	2426	1638	1458	2280.5
1.6333	2440	1646	1468	2293.6
1.6416	2452	1656	1474	2304.9
1.65	2466	1666	1484	2318.1
1.6583	2480	1674	1496	2331.2
1.6666	2496	1684	1502	2346.3
1.675	2508	1692	1512	2357.6
1.6833	2522	1704	1522	2370.7
1.6916	2538	1712	1530	2385.8
1.7	2550	1722	1540	2397
1.7083	2564	1730	1548	2410.2
1.7166	2578	1738	1556	2423.4
1.725	2592	1746	1566	2436.5
1.7333	2606	1758	1576	2449.7
1.7416	2620	1768	1586	2462.8
1.75	2634	1776	1596	2476
1.7583	2650	1786	1604	2491
1.7666	2660	1794	1614	2500.4
1.775	2676	1804	1622	2515.5
1.7833	2688	1814	1634	2526.8
1.7916	2702	1822	1640	2539.9
1.8	2716	1832	1650	2553.1
1.8083	2730	1840	1660	2566.2
1.8166	2744	1850	1668	2579.4
1.825	2758	1858	1678	2592.6
1.8333	2772	1868	1688	2605.7
1.8416	2786	1878	1698	2618.9
1.85	2796	1886	1704	2628.3
1.8583	2810	1896	1712	2641.4
1.8666	2824	1906	1722	2654.6
1.875	2840	1914	1732	2669.6
1.8833	2852	1924	1742	2680.9
1.8916	2868	1932	1752	2696
1.9	2878	1940	1756	2705.4
1.9083	2892	1948	1764	2718.5
1.9166	2906	1956	1772	2731.7
1.925	2920	1968	1784	2744.8
1.9333	2936	1978	1794	2759.9
1.9416	2950	1984	1800	2773
1.95	2964	1996	1810	2786.2
1.9583	2976	2004	1820	2797.5
1.9666	2990	2016	1830	2810.6
1.975	3004	2022	1838	2823.8
1.9833	3016	2032	1848	2835.1
1.9916	3032	2044	1858	2850.1
2	3046	2052	1866	2863.3
2.0083	3058	2062	1874	2874.6
2.0166	3070	2070	1882	2885.8
2.025	3084	2076	1892	2899
2.0333	3100	2088	1902	2914
2.0416	3114	2096	1912	2927.2
2.05	3130	2106	1920	2942.2
2.0583	3142	2116	1930	2953.5
2.0666	3154	2126	1940	2964.8
2.075	3170	2134	1948	2979.8
2.0833	3182	2142	1956	2991.1
2.0916	3196	2150	1964	3004.3
2.1	3210	2160	1972	3017.4
2.1083	3222	2170	1982	3028.7
2.1166	3236	2178	1992	3041.9
2.125	3250	2188	2000	3055
2.1333	3262	2196	2008	3066.3
2.1416	3274	2206	2016	3077.6
2.15	3288	2214	2024	3090.8
2.1583	3300	2222	2034	3102
2.1666	3314	2232	2042	3115.2
2.175	3330	2242	2052	3130.2
2.1833	3344	2252	2062	3143.4
2.1916	3358	2260	2072	3156.6
2.2	3370	2270	2078	3167.8
2.2083	3382	2276	2088	3179.1
2.2166	3396	2286	2098	3192.3
2.225	3410	2296	2104	3205.4
2.2333	3426	2308	2114	3220.5
2.2416	3438	2316	2124	3231.8
2.25	3450	2326	2132	3243
2.2583	3462	2334	2142	3254.3
2.2666	3476	2342	2150	3267.5
2.275	3490	2352	2160	3280.6
2.2833	3502	2360	2168	3291.9
2.2916	3520	2370	2178	3308.8
2.3	3530	2380	2184	3318.2
2.3083	3544	2388	2192	3331.4
2.3166	3556	2400	2204	3342.7
2.325	3570	2408	2214	3355.8
2.3333	3586	2418	2222	3370.9
2.3416	3598	2428	2232	3382.2
2.35	3614	2438	2242	3397.2
2.3583	3628	2448	2250	3410.4
2.3666	3640	2456	2258	3421.6
2.375	3652	2462	2264	3432.9
2.3833	3664	2470	2276	3444.2
2.3916	3680	2480	2286	3459.2
2.4	3694	2488	2294	3472.4
2.4083	3706	2500	2304	3483.7
2.4166	3718	2508	2312	3495
2.425	3730	2516	2320	3506.2
2.4333	3742	2526	2328	3517.5
2.4416	3758	2534	2338	3532.6
2.45	3772	2544	2346	3545.7
2.4583	3788	2552	2360	3560.8
2.4666	3798	2562	2364	3570.2
2.475	3814	2570	2374	3585.2
2.4833	3826	2580	2384	3596.5
2.4916	3838	2588	2392	3607.8
2.5	3852	2596	2400	3620.9
2.5083	3864	2604	2408	3632.2
2.5166	3880	2614	2418	3647.2
2.525	3894	2624	2426	3660.4
2.5333	3908	2634	2436	3673.6
2.5416	3918	2642	2444	3683
2.55	3934	2650	2454	3698
2.5583	3946	2660	2462	3709.3
2.5666	3960	2668	2472	3722.4
2.575	3972	2678	2482	3733.7
2.5833	3988	2688	2492	3748.8
2.5916	4002	2698	2500	3761.9
2.6	4016	2708	2508	3775.1
2.6083	4030	2716	2518	3788.2
2.6166	4046	2724	2526	3803.3
2.625	4058	2734	2536	3814.6
2.6333	4072	2742	2546	3827.7
2.6416	4088	2750	2554	3842.8
2.65	4100	2760	2564	3854
2.6583	4114	2772	2572	3867.2
2.6666	4128	2780	2582	3880.4
2.675	4140	2788	2590	3891.6
2.6833	4156	2796	2598	3906.7
2.6916	4172	2806	2608	3921.7
2.7	4184	2814	2616	3933
2.7083	4196	2824	2624	3944.3
2.7166	4210	2834	2634	3957.4
2.725	4224	2842	2644	3970.6
2.7333	4236	2852	2650	3981.9
2.7416	4250	2860	2660	3995
2.75	4266	2870	2670	4010.1
2.7583	4278	2878	2678	4021.4
2.7666	4292	2886	2688	4034.5
2.775	4306	2896	2698	4047.7
2.7833	4316	2904	2706	4057.1
2.7916	4330	2914	2714	4070.2
2.8	4344	2922	2722	4083.4
2.8083	4356	2930	2730	4094.7
2.8166	4372	2938	2740	4109.7
2.825	4386	2946	2748	4122.9
2.8333	4402	2956	2758	4137.9
2.8416	4414	2964	2764	4149.2
2.85	4424	2970	2774	4158.6
2.8583	4440	2982	2782	4173.6
2.8666	4454	2990	2792	4186.8
2.875	4468	3000	2800	4200
2.8833	4480	3008	2812	4211.2
2.8916	4492	3018	2818	4222.5
2.9	4506	3026	2828	4235.7
2.9083	4522	3036	2836	4250.7
2.9166	4534	3044	2846	4262
2.925	4550	3052	2856	4277
2.9333	4560	3060	2862	4286.4
2.9416	4574	3070	2872	4299.6
2.95	4588	3080	2880	4312.8
2.9583	4604	3088	2890	4327.8
2.9666	4618	3096	2898	4341
2.975	4630	3104	2908	4352.2
2.9833	4642	3114	2916	4363.5
2.9916	4656	3122	2924	4376.7
3	4670	3132	2934	4389.8
3.0083	4686	3140	2940	4404.9
3.0166	4698	3148	2950	4416.2
3.025	4712	3160	2958	4429.3
3.0333	4726	3166	2966	4442.5
3.0416	4740	3176	2976	4455.6
3.05	4754	3186	2982	4468.8
3.0583	4770	3194	2992	4483.8
3.0666	4780	3204	3002	4493.2
3.075	4796	3210	3010	4508.3
3.0833	4808	3220	3018	4519.6
3.0916	4820	3230	3028	4530.8
3.1	4832	3236	3036	4542.1
3.1083	4846	3244	3044	4555.3
3.1166	4862	3254	3054	4570.3
3.125	4876	3262	3064	4583.5
3.1333	4890	3272	3072	4596.6
3.1416	4902	3280	3080	4607.9
3.15	4916	3288	3090	4621.1
3.1583	4930	3298	3098	4634.2
3.1666	4944	3306	3106	4647.4
3.175	4958	3316	3114	4660.6
3.1833	4974	3326	3122	4675.6
3.1916	4986	3332	3132	4686.9
3.2	5000	3344	3140	4700
3.2083	5014	3350	3148	4713.2
3.2166	5026	3356	3158	4724.5
3.225	5040	3364	3164	4737.6
3.2333	5052	3372	3174	4748.9
3.2416	5068	3380	3182	4764
3.25	5084	3390	3192	4779
3.2583	5096	3398	3200	4790.3
3.2666	5110	3406	3208	4803.4
3.275	5124	3414	3218	4816.6
3.2833	5134	3424	3226	4826
3.2916	5150	3432	3234	4841
3.3	5162	3442	3242	4852.3
3.3083	5180	3450	3252	4869.2
3.3166	5194	3458	3260	4882.4
3.325	5206	3468	3270	4893.7
3.3333	5218	3476	3276	4905
3.3416	5234	3484	3284	4920
3.35	5246	3494	3292	4931.3
3.3583	5262	3502	3302	4946.3
3.3666	5276	3512	3310	4959.5
3.375	5290	3522	3322	4972.6
3.3833	5306	3528	3328	4987.7
3.3916	5316	3536	3336	4997.1
3.4	5330	3544	3346	5010.2
3.4083	5344	3554	3354	5023.4
3.4166	5360	3562	3362	5038.4
3.425	5372	3570	3372	5049.7
3.4333	5386	3580	3380	5062.9
3.4416	5400	3588	3388	5076
3.45	5416	3596	3398	5091.1
3.4583	5428	3604	3404	5102.4
3.4666	5438	3614	3414	5111.8
3.475	5456	3622	3422	5128.7
3.4833	5468	3630	3432	5140
3.4916	5484	3638	3440	5155
3.5	5500	3646	3448	5170
3.5083	5514	3656	3458	5183.2
3.5166	5528	3664	3466	5196.4
3.525	5540	3674	3474	5207.6
3.5333	5556	3680	3484	5222.7
3.5416	5572	3690	3492	5237.7
3.55	5584	3698	3500	5249
3.5583	5600	3706	3508	5264
3.5666	5612	3714	3518	5275.3
3.575	5626	3722	3526	5344.7
3.5833	5640	3732	3534	5358
3.5916	5654	3738	3542	5371.3
3.6	5666	3746	3550	5382.7
3.6083	5682	3752	3560	5397.9
3.6166	5696	3762	3568	5411.2
3.625	5710	3770	3576	5424.5
3.6333	5726	3776	3584	5439.7
3.6416	5740	3786	3594	5453
3.65	5754	3796	3602	5466.3
3.6583	5768	3804	3608	5479.6
3.6666	5782	3812	3616	5492.9
3.675	5796	3820	3626	5506.2
3.6833	5810	3828	3634	5519.5
3.6916	5822	3836	3642	5530.9
3.7	5836	3846	3650	5544.2
3.7083	5852	3852	3660	5559.4
3.7166	5866	3862	3668	5572.7
3.725	5882	3870	3678	5587.9
3.7333	5890	3878	3684	5595.5
3.7416	5906	3886	3692	5610.7
3.75	5920	3894	3702	5624
3.7583	5936	3902	3712	5639.2
3.7666	5950	3912	3720	5652.5
3.775	5964	3920	3730	5665.8
3.7833	5980	3928	3738	5681
3.7916	5990	3934	3744	5690.5
3.8	6002	3942	3752	5701.9
3.8083	6018	3952	3762	5717.1
3.8166	6034	3960	3770	5732.3
3.825	6048	3968	3780	5745.6
3.8333	6062	3976	3788	5758.9
3.8416	6076	3984	3796	5772.2
3.85	6090	3992	3806	5785.5
3.8583	6104	4000	3810	5798.8
3.8666	6118	4008	3820	5812.1
3.875	6132	4018	3832	5825.4
3.8833	6148	4026	3838	5840.6
3.8916	6158	4034	3848	5850.1
3.9	6174	4044	3856	5865.3
3.9083	6188	4052	3866	5878.6
3.9166	6202	4062	3876	5891.9
3.925	6218	4072	3884	5907.1
3.9333	6230	4078	3892	5918.5
3.9416	6242	4086	3902	5929.9
3.95	6258	4094	3910	5882.6
3.9583	6272	4102	3914	5895.7
3.9666	6286	4112	3924	5908.9
3.975	6300	4116	3934	5922
3.9833	6314	4124	3940	5935.2
3.9916	6328	4134	3948	5948.4
4	6344	4140	3958	5963.4
4.0083	6354	4148	3966	5972.8
4.0166	6368	4156	3974	5986
4.025	6382	4164	3984	5999.1
4.0333	6398	4172	3992	6014.2
4.0416	6410	4182	4002	6025.4
4.05	6424	4188	4008	6038.6
4.0583	6438	4192	4012	6051.8
4.0666	6452	4198	4020	6064.9
4.075	6464	4204	4028	6076.2
4.0833	6480	4214	4038	6091.2
4.0916	6492	4222	4044	6102.5
4.1	6508	4230	4052	6117.6
4.1083	6520	4238	4062	6128.8
4.1166	6536	4246	4070	6143.9
4.125	6548	4254	4078	6089.7
4.1333	6562	4262	4088	6102.7
4.1416	6576	4270	4096	6115.7
4.15	6590	4278	4104	6128.7
4.1583	6608	4288	4112	6145.5
4.1666	6622	4296	4122	6158.5
4.175	6634	4304	4130	6169.7
4.1833	6650	4312	4138	6184.5
4.1916	6662	4322	4146	6195.7
4.2	6678	4330	4156	6210.6
4.2083	6692	4338	4166	6223.6
4.2166	6708	4348	4174	6238.5
4.225	6718	4354	4182	6247.8
4.2333	6736	4364	4192	6264.5
4.2416	6748	4372	4200	6275.7
4.25	6764	4380	4208	6290.6
4.2583	6780	4386	4214	6305.4
4.2666	6794	4392	4222	6318.5
4.275	6808	4402	4232	6331.5
4.2833	6822	4408	4240	6344.5
4.2916	6836	4416	4248	6357.5
4.3	6850	4426	4258	6370.5
4.3083	6864	4432	4266	6383.6
4.3166	6880	4438	4274	6398.4
4.325	6894	4448	4284	6411.5
4.3333	6910	4454	4292	6426.3
4.3416	6924	4462	4300	6439.4
4.35	6938	4470	4308	6452.4
4.3583	6954	4478	4316	6467.3
4.3666	6966	4484	4324	6478.4
4.375	6980	4494	4332	6491.4
4.3833	6996	4500	4342	6506.3
4.3916	7008	4508	4348	6517.5
4.4	7022	4516	4356	6530.5
4.4083	7038	4524	4366	6545.4
4.4166	7050	4532	4374	6556.5
4.425	7062	4538	4380	6567.7
4.4333	7078	4546	4388	6582.6
4.4416	7092	4554	4398	6595.6
4.45	7108	4562	4406	6610.5
4.4583	7122	4570	4416	6623.5
4.4666	7136	4578	4422	6636.5
4.475	7150	4586	4432	6649.5
4.4833	7164	4592	4438	6662.6
4.4916	7178	4600	4448	6675.6
4.5	7192	4608	4458	6688.6
4.5083	7208	4616	4464	6703.5
4.5166	7218	4624	4474	6712.8
4.525	7234	4630	4482	6727.7
4.5333	7250	4638	4488	6742.5
4.5416	7264	4646	4498	6755.6
4.55	7278	4654	4506	6768.6
4.5583	7292	4662	4514	6781.6
4.5666	7308	4672	4524	6796.5
4.575	7322	4678	4532	6809.5
4.5833	7334	4686	4538	6820.7
4.5916	7352	4694	4548	6837.4
4.6	7364	4702	4556	6848.6
4.6083	7378	4710	4566	6861.6
4.6166	7394	4718	4574	6876.5
4.625	7406	4726	4582	6961.7
4.6333	7420	4732	4590	6974.8
4.6416	7436	4740	4598	6989.9
4.65	7448	4748	4608	7001.2
4.6583	7462	4756	4616	7014.3
4.6666	7476	4764	4624	7027.5
4.675	7490	4772	4632	7040.6
4.6833	7504	4778	4642	7053.8
4.6916	7520	4784	4650	7068.8
4.7	7534	4792	4656	7082
4.7083	7546	4798	4666	7093.3
4.7166	7562	4806	4674	7108.3
4.725	7576	4816	4682	7121.5
4.7333	7592	4822	4692	7136.5
4.7416	7604	4828	4698	7147.8
4.75	7620	4838	4706	7162.8
4.7583	7630	4842	4714	7172.2
4.7666	7648	4852	4724	7189.2
4.775	7662	4858	4732	7202.3
4.7833	7676	4866	4740	7215.5
4.7916	7696	4874	4750	7234.3
4.8	7710	4882	4756	7247.4
4.8083	7724	4890	4766	7260.6
4.8166	7736	4896	4770	7271.9
4.825	7750	4902	4780	7285
4.8333	7766	4910	4790	7300.1
4.8416	7780	4918	4798	7313.2
4.85	7796	4926	4804	7328.3
4.8583	7808	4934	4814	7339.6
4.8666	7822	4942	4824	7352.7
4.875	7838	4948	4830	7367.8
4.8833	7852	4954	4838	7380.9
4.8916	7864	4962	4846	7392.2
4.9	7880	4970	4856	7407.2
4.9083	7894	4978	4864	7420.4
4.9166	7910	4984	4874	7435.4
4.925	7928	4994	4884	7452.4
4.9333	7938	5000	4890	7461.8
4.9416	7954	5008	4900	7476.8
4.95	7968	5014	4908	7490
4.9583	7982	5024	4914	7503.1
4.9666	7996	5030	4928	7516.3
4.975	8010	5038	4934	7529.4
4.9833	8026	5048	4942	7544.5
4.9916	8038	5054	4950	7555.8
5	8052	5060	4960	7568.9
5.0083	8068	5068	4968	7584
5.0166	8078	5076	4976	7593.4
5.025	8094	5082	4984	7608.4
5.0333	8106	5088	4992	7619.7
5.0416	8124	5098	5002	7636.6
5.05	8138	5104	5010	7649.8
5.0583	8152	5112	5018	7662.9
5.0666	8166	5118	5024	7676.1
5.075	8182	5128	5032	7691.1
5.0833	8194	5134	5042	7702.4
5.0916	8210	5142	5050	7717.4
5.1	8222	5148	5058	7728.7
5.1083	8238	5156	5066	7743.8
5.1166	8252	5164	5074	7756.9
5.125	8266	5174	5084	7770.1
5.1333	8282	5180	5092	7785.1
5.1416	8296	5186	5102	7798.3
5.15	8310	5194	5108	7811.4
5.1583	8324	5204	5118	7824.6
5.1666	8338	5210	5126	7837.8
5.175	8352	5218	5134	7850.9
5.1833	8370	5222	5142	7867.8
5.1916	8382	5230	5150	7879.1
5.2	8398	5238	5158	7894.2
5.2083	8414	5244	5168	7909.2
5.2166	8426	5252	5174	7920.5
5.225	8436	5258	5182	7929.9
5.2333	8454	5266	5190	7946.8
5.2416	8468	5274	5198	7960
5.25	8482	5280	5208	7973.1
5.2583	8496	5288	5216	7986.3
5.2666	8514	5294	5224	8003.2
5.275	8520	5302	5232	8008.8
5.2833	8538	5310	5238	8025.8
5.2916	8554	5316	5248	8040.8
5.3	8568	5324	5256	8054
5.3083	8582	5330	5264	8067.1
5.3166	8596	5340	5272	8080.3
5.325	8606	5342	5276	8089.7
5.3333	8624	5352	5286	8106.6
5.3416	8638	5360	5294	8119.8
5.35	8650	5366	5302	8131
5.3583	8668	5374	5312	8148
5.3666	8682	5380	5320	8161.1
5.375	8696	5388	5328	8174.3
5.3833	8710	5394	5334	8187.4
5.3916	8724	5400	5344	8200.6
5.4	8738	5408	5352	8213.8
5.4083	8752	5416	5360	8226.9
5.4166	8766	5422	5370	8240.1
5.425	8782	5430	5378	8255.1
5.4333	8796	5436	5386	8268.3
5.4416	8810	5444	5394	8281.4
5.45	8822	5450	5402	8292.7
5.4583	8836	5458	5412	8305.9
5.4666	8854	5468	5420	8322.8
5.475	8868	5472	5428	8336
5.4833	8882	5480	5436	8349.1
5.4916	8900	5488	5444	8366
5.5	8912	5494	5454	8377.3
5.5083	8924	5500	5460	8388.6
5.5166	8942	5510	5470	8405.5
5.525	8954	5516	5478	8416.8
5.5333	8970	5524	5486	8431.8
5.5416	8986	5530	5496	8446.9
5.55	9002	5538	5502	8461.9
5.5583	9016	5546	5510	8475.1
5.5666	9030	5552	5518	8488.2
5.575	9042	5558	5524	8499.5
5.5833	9056	5566	5532	8512.7
5.5916	9070	5574	5542	8525.8
5.6	9086	5582	5550	8540.9
5.6083	9100	5588	5558	8554
5.6166	9112	5594	5566	8565.3
5.625	9128	5600	5572	8580.4
5.6333	9142	5608	5582	8593.5
5.6416	9158	5616	5588	8608.6
5.65	9172	5622	5598	8621.7
5.6583	9186	5630	5606	8634.9
5.6666	9200	5636	5616	8648
5.675	9216	5644	5624	8663.1
5.6833	9230	5650	5632	8676.2
5.6916	9242	5656	5640	8687.5
5.7	9260	5662	5648	8704.4
5.7083	9274	5668	5656	8717.6
5.7166	9290	5674	5666	8732.6
5.725	9302	5682	5672	8743.9
5.7333	9318	5690	5682	8759
5.7416	9334	5698	5690	8774
5.75	9348	5706	5696	8787.2
5.7583	9364	5712	5708	8802.2
5.7666	9378	5720	5714	8815.4
5.775	9390	5728	5724	8920.5
5.7833	9406	5734	5730	8935.7
5.7916	9420	5742	5740	8949
5.8	9434	5748	5746	8962.3
5.8083	9448	5754	5754	8975.6
5.8166	9462	5762	5762	8988.9
5.825	9476	5768	5770	9002.2
5.8333	9490	5776	5776	9015.5
5.8416	9504	5786	5784	9028.8
5.85	9520	5790	5792	9044
5.8583	9536	5796	5800	9059.2
5.8666	9550	5802	5810	9072.5
5.875	9566	5810	5818	9087.7
5.8833	9582	5818	5828	9102.9
5.8916	9594	5824	5836	9114.3
5.9	9610	5830	5842	9129.5
5.9083	9624	5840	5852	9142.8
5.9166	9640	5846	5858	9158
5.925	9654	5854	5868	9171.3
5.9333	9670	5860	5876	9186.5
5.9416	9682	5870	5884	9197.9
5.95	9696	5874	5892	9211.2
5.9583	9710	5882	5900	9224.5
5.9666	9726	5886	5910	9239.7
5.975	9740	5894	5918	9253
5.9833	9756	5902	5926	9268.2
5.9916	9770	5908	5934	9281.5
6	9786	5914	5942	9296.7
6.0083	9800	5922	5950	9310
6.0166	9816	5928	5958	9325.2
6.025	9830	5932	5966	9338.5
6.0333	9848	5938	5976	9355.6
6.0416	9862	5946	5984	9368.9
6.05	9880	5954	5990	9386
6.0583	9896	5960	6000	9401.2
6.0666	9910	5966	6006	9414.5
6.075	9922	5974	6016	9425.9
6.0833	9936	5980	6022	9439.2
6.0916	9952	5986	6030	9454.4
6.1	9966	5990	6038	9467.7
6.1083	9978	6000	6046	9479.1
6.1166	9996	6004	6054	9496.2
6.125	10008	6014	6062	9507.6
6.1333	10022	6018	6070	9520.9
6.1416	10040	6026	6078	9538
6.15	10054	6034	6088	9551.3
6.1583	10070	6040	6096	9566.5
6.1666	10084	6048	6104	9579.8
6.175	10100	6054	6110	9595
6.1833	10112	6062	6120	9606.4
6.1916	10130	6068	6128	9623.5
6.2	10144	6074	6136	9636.8
6.2083	10158	6080	6144	9650.1
6.2166	10174	6088	6152	9665.3
6.225	10190	6094	6162	9680.5
6.2333	10202	6100	6168	9691.9
6.2416	10218	6108	6178	9707.1
6.25	10230	6114	6186	9718.5
6.2583	10244	6120	6192	9629.4
6.2666	10258	6128	6202	9847.7
6.275	10272	6134	6210	9861.2
6.2833	10290	6142	6216	9878.4
6.2916	10304	6146	6222	9891.9
6.3	10318	6152	6230	9905.3
6.3083	10332	6158	6240	9918.8
6.3166	10346	6166	6248	9932.2
6.325	10362	6172	6256	9947.6
6.3333	10376	6178	6266	9961
6.3416	10388	6186	6274	9972.5
6.35	10402	6192	6280	9986
6.3583	10418	6198	6286	10001.3
6.3666	10430	6204	6296	10012.8
6.375	10446	6210	6304	10028.2
6.3833	10460	6218	6312	10041.6
6.3916	10476	6224	6320	10057
6.4	10492	6232	6328	10072.4
6.4083	10506	6238	6336	10085.8
6.4166	10516	6244	6344	10095.4
6.425	10532	6250	6350	10110.8
6.4333	10548	6258	6360	10126.1
6.4416	10562	6264	6368	10139.6
6.45	10576	6270	6378	10153
6.4583	10592	6278	6386	10168.4
6.4666	10606	6284	6394	10181.8
6.475	10620	6290	6400	10195.2
6.4833	10634	6298	6410	10208.7
6.4916	10648	6306	6418	10222.1
6.5	10662	6310	6426	10235.6
6.5083	10676	6316	6432	10249
6.5166	10692	6324	6440	10264.4
6.525	10706	6330	6448	10277.8
6.5333	10722	6338	6456	10293.2
6.5416	10736	6344	6464	10306.6
6.55	10752	6352	6472	10322
6.5583	10766	6358	6480	10335.4
6.5666	10782	6364	6488	10350.8
6.575	10794	6372	6496	10362.3
6.5833	10808	6378	6506	10375.7
6.5916	10824	6384	6514	10391.1
6.6	10840	6390	6522	10406.4
6.6083	10854	6396	6528	10419.9
6.6166	10868	6404	6538	10433.3
6.625	10882	6410	6546	10446.8
6.6333	10896	6416	6554	10460.2
6.6416	10910	6424	6560	10473.6
6.65	10924	6428	6570	10487.1
6.6583	10938	6436	6580	10500.5
6.6666	10954	6442	6586	10515.9
6.675	10968	6448	6594	10529.3
6.6833	10982	6454	6602	10542.8
6.6916	10998	6460	6610	10558.1
6.7	11012	6466	6618	10571.6
6.7083	11028	6474	6626	10586.9
6.7166	11042	6480	6634	10600.4
6.725	11056	6486	6642	10613.8
6.7333	11072	6492	6650	10629.2
6.7416	11086	6498	6656	10642.6
6.75	11098	6504	6666	10654.1
6.7583	11112	6510	6672	10667.6
6.7666	11128	6518	6680	10682.9
6.775	11144	6524	6688	10698.3
6.7833	11160	6532	6698	10713.6
6.7916	11174	6538	6704	10727.1
6.8	11186	6546	6714	10738.6
6.8083	11200	6550	6722	10752
6.8166	11218	6556	6728	10769.3
6.825	11232	6562	6736	10782.8
6.8333	11248	6568	6746	10798.1
6.8416	11264	6576	6754	10813.5
6.85	11278	6582	6764	10826.9
6.8583	11294	6588	6772	10842.3
6.8666	11310	6596	6778	10857.6
6.875	11322	6602	6786	10869.2
6.8833	11336	6608	6796	10882.6
6.8916	11350	6614	6802	10896
6.9	11364	6620	6810	10909.5
6.9083	11378	6624	6818	10922.9
6.9166	11392	6632	6828	10936.4
6.925	11408	6638	6834	10951.7
6.9333	11420	6644	6842	10963.2
6.9416	11438	6650	6850	10980.5
6.95	11450	6654	6856	10992
6.9583	11466	6660	6862	11007.4
6.9666	11480	6668	6870	11020.8
6.975	11496	6674	6882	11036.2
6.9833	11512	6680	6888	11051.6
6.9916	11526	6686	6894	11065
7	11538	6692	6904	11076.5
7.0083	11552	6698	6912	11090
7.0166	11568	6702	6920	11105.3
7.025	11582	6708	6928	11118.8
7.0333	11598	6714	6936	11134.1
7.0416	11610	6720	6944	11145.6
7.05	11626	6728	6950	11161
7.0583	11642	6732	6962	11176.4
7.0666	11658	6738	6968	11191.7
7.075	11672	6746	6978	11205.2
7.0833	11688	6752	6986	11220.5
7.0916	11704	6758	6992	11235.9
7.1	11716	6764	7000	11247.4
7.1083	11732	6768	7010	11262.8
7.1166	11746	6776	7018	11276.2
7.125	11762	6782	7026	11173.9
7.1333	11776	6788	7032	11187.2
7.1416	11792	6792	7040	11202.4
7.15	11808	6800	7050	11217.6
7.1583	11820	6806	7056	11229
7.1666	11834	6810	7062	11242.3
7.175	11850	6818	7070	11257.5
7.1833	11864	6822	7080	11270.8
7.1916	11880	6830	7088	11286
7.2	11894	6836	7096	11299.3
7.2083	11908	6840	7104	11312.6
7.2166	11920	6846	7110	11324
7.225	11936	6854	7118	11339.2
7.2333	11950	6860	7128	11352.5
7.2416	11964	6864	7134	11365.8
7.25	11978	6870	7144	11379.1
7.2583	11992	6876	7150	11392.4
7.2666	12008	6880	7160	11407.6
7.275	12022	6888	7166	11420.9
7.2833	12038	6894	7176	11436.1
7.2916	12052	6898	7182	11449.4
7.3	12064	6904	7190	11460.8
7.3083	12068	6910	7198	11464.6
7.3166	12080	6916	7206	11476
7.325	12094	6922	7214	11489.3
7.3333	12108	6928	7222	11502.6
7.3416	12124	6932	7230	11517.8
7.35	12138	6938	7238	11531.1
7.3583	12152	6944	7246	11544.4
7.3666	12166	6948	7252	11557.7
7.375	12180	6954	7260	11571
7.3833	12194	6960	7268	11584.3
7.3916	12208	6968	7274	11597.6
7.4	12222	6974	7282	11610.9
7.4083	12238	6978	7292	11626.1
7.4166	12256	6984	7298	11643.2
7.425	12268	6990	7306	11654.6
7.4333	12282	6994	7314	11667.9
7.4416	12298	7002	7322	11683.1
7.45	12314	7008	7330	11698.3
7.4583	12328	7014	7338	11711.6
7.4666	12344	7020	7346	11726.8
7.475	12358	7024	7356	11740.1
7.4833	12372	7030	7364	11753.4
7.4916	12388	7036	7372	11768.6
7.5	12400	7042	7378	11780
7.5083	12428	7048	7386	11806.6
7.5166	12446	7054	7394	11823.7
7.525	12464	7058	7402	11840.8
7.5333	12480	7064	7410	11856
7.5416	12496	7070	7416	11871.2
7.55	12512	7076	7424	11886.4
7.5583	12524	7080	7432	11897.8
7.5666	12540	7086	7442	11913
7.575	12554	7092	7448	11926.3
7.5833	12570	7096	7456	11941.5
7.5916	12582	7102	7462	11952.9
7.6	12598	7108	7470	11968.1
7.6083	12614	7114	7478	11983.3
7.6166	12626	7120	7486	11994.7
7.625	12646	7126	7492	12013.7
7.6333	12662	7130	7502	12028.9
7.6416	12676	7136	7510	12042.2
7.65	12690	7142	7518	12055.5
7.6583	12702	7146	7524	12066.9
7.6666	12718	7152	7532	12082.1
7.675	12734	7158	7540	12097.3
7.6833	12748	7162	7548	12110.6
7.6916	12764	7166	7558	12125.8
7.7	12776	7172	7566	12137.2
7.7083	12790	7178	7574	12150.5
7.7166	12804	7182	7580	12163.8
7.725	12822	7188	7586	12180.9
7.7333	12834	7194	7596	12192.3
7.7416	12852	7198	7602	12209.4
7.75	12868	7204	7612	12224.6
7.7583	12882	7208	7620	12237.9
7.7666	12898	7216	7628	12253.1
7.775	12908	7220	7636	12262.6
7.7833	12924	7226	7642	12277.8
7.7916	12936	7232	7650	12289.2
7.8	12952	7236	7656	12304.4
7.8083	12966	7242	7664	12317.7
7.8166	12980	7246	7672	12331
7.825	12994	7252	7680	12344.3
7.8333	13004	7260	7688	12353.8
7.8416	13014	7264	7696	12363.3
7.85	13026	7268	7702	12374.7
7.8583	13040	7272	7710	12388
7.8666	13052	7278	7716	12399.4
7.875	13066	7284	7724	12412.7
7.8833	13080	7288	7734	12426
7.8916	13092	7296	7742	12437.4
7.9	13104	7298	7748	12448.8
7.9083	13118	7306	7756	12462.1
7.9166	13130	7310	7764	12473.5
7.925	13146	7316	7772	12357.3
7.9333	13160	7320	7780	12370.4
7.9416	13176	7326	7788	12385.5
7.95	13190	7330	7796	12398.6
7.9583	13204	7338	7804	12411.8
7.9666	13218	7342	7812	12425
7.975	13232	7346	7822	12438.1
7.9833	13246	7350	7830	12451.3
7.9916	13260	7356	7838	12464.4
8	13274	7362	7844	12477.6
8.0083	13288	7368	7852	12490.8
8.0166	13300	7372	7860	12502
8.025	13316	7380	7868	12517.1
8.0333	13328	7382	7876	12528.4
8.0416	13342	7388	7884	12541.5
8.05	13356	7390	7892	12554.7
8.0583	13372	7398	7902	12569.7
8.0666	13386	7404	7908	12582.9
8.075	13398	7408	7916	12594.2
8.0833	13410	7412	7924	12605.4
8.0916	13424	7420	7932	12618.6
8.1	13436	7422	7938	12629.9
8.1083	13448	7428	7946	12641.2
8.1166	13462	7432	7956	12654.3
8.125	13476	7438	7964	12667.5
8.1333	13486	7444	7968	12676.9
8.1416	13500	7450	7976	12690
8.15	13514	7454	7984	12703.2
8.1583	13526	7458	7992	12714.5
8.1666	13540	7462	7998	12727.6
8.175	13558	7468	8006	12744.6
8.1833	13588	7474	8014	12772.8
8.1916	13602	7478	8022	12785.9
8.2	13620	7484	8028	12802.8
8.2083	13634	7490	8036	12816
8.2166	13650	7492	8042	12831
8.225	13664	7498	8050	12844.2
8.2333	13678	7504	8056	12857.4
8.2416	13692	7508	8066	12870.5
8.25	13706	7510	8074	12883.7
8.2583	13722	7516	8082	12898.7
8.2666	13736	7524	8090	12911.9
8.275	13748	7528	8096	12923.2
8.2833	13760	7532	8104	12934.4
8.2916	13774	7538	8110	12947.6
8.3	13786	7540	8118	12958.9
8.3083	13798	7548	8128	12970.2
8.3166	13814	7552	8134	12985.2
8.325	13826	7556	8142	12996.5
8.3333	13838	7560	8150	13007.8
8.3416	13850	7564	8158	13019
8.35	13864	7570	8166	13032.2
8.3583	13876	7574	8172	13043.5
8.3666	13892	7578	8182	13058.5
8.375	13904	7582	8188	13069.8
8.3833	13916	7586	8194	13081.1
8.3916	13930	7592	8204	13094.2
8.4	13944	7596	8212	13107.4
8.4083	13956	7600	8218	13118.7
8.4166	13966	7604	8224	13128.1
8.425	13980	7608	8232	13141.2
8.4333	13992	7610	8238	13152.5
8.4416	14004	7616	8248	13163.8
8.45	14018	7620	8254	13177
8.4583	14030	7622	8262	13188.2
8.4666	14044	7628	8270	13201.4
8.475	14056	7630	8276	13212.7
8.4833	14070	7636	8282	13225.8
8.4916	14082	7638	8292	13237.1
8.5	14094	7644	8300	13248.4
8.5083	14106	7648	8308	13259.7
8.5166	14120	7654	8316	13272.8
8.525	14132	7658	8322	13284.1
8.5333	14146	7662	8328	13297.3
8.5416	14158	7664	8336	13308.6
8.55	14172	7670	8342	13321.7
8.5583	14186	7674	8350	13334.9
8.5666	14198	7678	8360	13346.2
8.575	14212	7680	8366	13359.3
8.5833	14228	7686	8374	13374.4
8.5916	14238	7690	8382	13383.8
8.6	14252	7696	8388	13396.9
8.6083	14264	7700	8394	13408.2
8.6166	14278	7706	8400	13421.4
8.625	14292	7708	8410	13434.5
8.6333	14304	7712	8416	13445.8
8.6416	14314	7716	8424	13455.2
8.65	14326	7722	8432	13466.5
8.6583	14340	7726	8440	13479.6
8.6666	14352	7730	8446	13490.9
8.675	14368	7734	8456	13506
8.6833	14376	7738	8460	13513.5
8.6916	14392	7742	8468	13528.5
8.7	14404	7746	8474	13539.8
8.7083	14416	7750	8484	13551.1
8.7166	14430	7756	8490	13564.2
8.725	14442	7758	8498	13575.5
8.7333	14454	7762	8504	13586.8
8.7416	14466	7766	8510	13598.1
8.75	14480	7770	8518	13611.2
8.7583	14492	7774	8528	13622.5
8.7666	14506	7778	8532	13635.7
8.775	14518	7784	8540	13647
8.7833	14530	7786	8548	13658.2
8.7916	14544	7790	8556	13671.4
8.8	14562	7792	8562	13688.3
8.8083	14572	7796	8568	13697.7
8.8166	14584	7802	8574	13709
8.825	14596	7804	8582	13720.3
8.8333	14610	7808	8588	13733.4
8.8416	14620	7812	8596	13742.8
8.85	14632	7816	8600	13754.1
8.8583	14644	7818	8610	13765.4
8.8666	14658	7818	8616	13778.6
8.875	14670	7820	8622	13789.8
8.8833	14682	7824	8630	13801.1
8.8916	14692	7826	8636	13810.5
8.9	14706	7830	8644	13823.7
8.9083	14720	7834	8646	13836.8
8.9166	14732	7840	8654	13848.1
8.925	14744	7840	8660	13859.4
8.9333	14756	7844	8666	13870.7
8.9416	14766	7850	8674	13880.1
8.95	14778	7852	8682	13891.4
8.9583	14790	7854	8686	13902.6
8.9666	14802	7860	8694	13913.9
8.975	14814	7862	8702	13925.2
8.9833	14824	7866	8708	13934.6
8.9916	14834	7870	8718	13944
9	14848	7872	8724	13957.2
9.0083	14860	7876	8730	13968.4
9.0166	14874	7878	8738	13981.6
9.025	14884	7882	8744	13991
9.0333	14896	7886	8748	14002.3
9.0416	14908	7888	8758	14013.6
9.05	14920	7892	8764	14024.8
9.0583	14930	7894	8772	14034.2
9.0666	14942	7898	8778	14045.5
9.075	14952	7902	8784	14054.9
9.0833	14962	7904	8792	14064.3
9.0916	14974	7910	8798	14075.6
9.1	14984	7910	8806	14085
9.1083	14994	7912	8814	14094.4
9.1166	15006	7916	8822	14105.7
9.125	15016	7920	8828	14115.1
9.1333	15028	7924	8834	14126.4
9.1416	15040	7926	8844	14137.6
9.15	15048	7930	8848	14145.2
9.1583	15058	7932	8856	14154.6
9.1666	15070	7934	8864	14165.8
9.175	15078	7940	8870	14173.4
9.1833	15088	7940	8878	14182.8
9.1916	15098	7944	8884	14192.2
9.2	15110	7946	8892	14203.4
9.2083	15118	7948	8898	14211
9.2166	15128	7952	8904	14220.4
9.225	15136	7954	8912	14227.9
9.2333	15138	7956	8916	14229.8
9.2416	15148	7960	8922	14239.2
9.25	15156	7962	8928	14246.7
9.2583	15166	7964	8936	14256.1
9.2666	15176	7966	8944	14265.5
9.275	15184	7968	8950	14273
9.2833	15194	7970	8956	14282.4
9.2916	15204	7974	8962	14291.8
9.3	15214	7974	8968	14301.2
9.3083	15222	7976	8976	14308.7
9.3166	15228	7978	8982	14314.4
9.325	15240	7980	8988	14325.6
9.3333	15248	7982	8996	14333.2
9.3416	15258	7982	9002	14342.6
9.35	15266	7986	9008	14350.1
9.3583	15276	7988	9016	14359.5
9.3666	15284	7988	9024	14367
9.375	15294	7992	9030	14376.4
9.3833	15300	7994	9036	14382
9.3916	15310	7994	9044	14391.4
9.4	15320	7998	9050	14400.8
9.4083	15328	7998	9058	14408.4
9.4166	15336	8000	9064	14415.9
9.425	15344	8000	9070	14423.4
9.4333	15356	8002	9078	14434.7
9.4416	15364	8002	9084	14442.2
9.45	15370	8006	9090	14447.8
9.4583	15380	8008	9094	14457.2
9.4666	15384	8008	9102	14461
9.475	15392	8010	9108	14468.5
9.4833	15398	8012	9114	14474.2
9.4916	15406	8010	9120	14481.7
9.5	15416	8010	9126	14491.1
9.5083	15424	8010	9130	14498.6
9.5166	15430	8014	9138	14504.2
9.525	15438	8016	9144	14511.8
9.5333	15446	8014	9152	14519.3
9.5416	15452	8016	9156	14524.9
9.55	15458	8018	9162	14530.6
9.5583	15466	8018	9168	14538.1
9.5666	15472	8020	9176	14543.7
9.575	15480	8022	9182	14551.2
9.5833	15488	8022	9188	14558.8
9.5916	15496	8024	9196	14566.3
9.6	15502	8026	9200	14571.9
9.6083	15506	8026	9208	14575.7
9.6166	15514	8028	9214	14583.2
9.625	15520	8028	9220	14588.8
9.6333	15526	8030	9226	14594.5
9.6416	15532	8030	9232	14600.1
9.65	15540	8032	9238	14607.6
9.6583	15546	8032	9244	14613.3
9.6666	15552	8032	9250	14618.9
9.675	15558	8032	9254	14624.6
9.6833	15564	8032	9262	14630.2
9.6916	15568	8034	9266	14634
9.7	15576	8036	9270	14641.5
9.7083	15582	8036	9274	14647.1
9.7166	15586	8036	9282	14650.9
9.725	15592	8038	9286	14656.5
9.7333	15598	8040	9294	14662.2
9.7416	15604	8040	9298	14667.8
9.75	15608	8042	9306	14671.6
9.7583	15616	8042	9312	14679.1
9.7666	15622	8042	9318	14684.7
9.775	15626	8044	9324	14688.5
9.7833	15628	8044	9338	14690.4
9.7916	15636	8046	9342	14697.9
9.8	15642	8046	9352	14703.5
9.8083	15646	8048	9358	14707.3
9.8166	15650	8048	9364	14711
9.825	15656	8050	9370	14716.7
9.8333	15664	8050	9380	14724.2
9.8416	15666	8052	9386	14726.1
9.85	15670	8052	9392	14729.8
9.8583	15678	8054	9398	14737.4
9.8666	15682	8052	9404	14741.1
9.875	15686	8054	9412	14744.9
9.8833	15692	8054	9416	14750.5
9.8916	15698	8054	9422	14756.2
9.9	15702	8056	9430	14759.9
9.9083	15706	8056	9436	14763.7
9.9166	15712	8056	9442	14769.3
9.925	15714	8056	9448	14771.2
9.9333	15716	8058	9452	14773.1
9.9416	15722	8058	9460	14778.7
9.95	15724	8058	9474	14780.6
9.9583	15726	8058	9486	14782.5
9.9666	15732	8058	9494	14788.1
9.975	15734	8058	9500	14790
9.9833	15738	8058	9508	14793.8
9.9916	15742	8058	9516	14797.5
10	15746	8060	9524	14801.3
10.0083	15750	8060	9530	14805
10.0166	15752	8060	9536	14806.9
10.025	15754	8060	9542	14808.8
10.0333	15758	8060	9548	14812.6
10.0416	15758	8060	9554	14812.6
10.05	15762	8060	9560	14816.3
10.0583	15766	8060	9566	14820.1
10.0666	15770	8060	9574	14823.8
10.075	15770	8060	9576	14823.8
10.0833	15772	8060	9580	14825.7
10.0916	15774	8058	9588	14827.6
10.1	15776	8060	9594	14829.5
10.1083	15778	8060	9598	14831.4
10.1166	15782	8058	9604	14835.1
10.125	15784	8058	9610	14837
10.1333	15784	8056	9618	14837
10.1416	15786	8058	9622	14838.9
10.15	15788	8058	9628	14840.8
10.1583	15788	8056	9634	14840.8
10.1666	15788	8056	9638	14840.8
10.175	15790	8054	9644	14842.6
10.1833	15792	8054	9650	14844.5
10.1916	15792	8052	9656	14844.5
10.2	15794	8052	9662	14846.4
10.2083	15794	8050	9666	14846.4
10.2166	15796	8050	9674	14848.3
10.225	15794	8048	9678	14846.4
10.2333	15796	8046	9684	14848.3
10.2416	15796	8046	9690	14848.3
10.25	15798	8044	9696	14850.2
10.2583	15794	8044	9700	14846.4
10.2666	15796	8044	9708	14848.3
10.275	15796	8042	9714	14848.3
10.2833	15796	8042	9718	14848.3
10.2916	15794	8040	9724	14846.4
10.3	15794	8040	9730	14846.4
10.3083	15786	8038	9736	14838.9
10.3166	15782	8036	9738	14835.1
10.325	15784	8036	9742	14837
10.3333	15782	8034	9750	14835.1
10.3416	15778	8032	9756	14831.4
10.35	15778	8032	9760	14831.4
10.3583	15776	8032	9766	14829.5
10.3666	15774	8030	9768	14827.6
10.375	15772	8030	9778	14825.7
10.3833	15774	8028	9782	14827.6
10.3916	15774	8028	9788	14827.6
10.4	15772	8026	9794	14825.7
10.4083	15770	8024	9800	14823.8
10.4166	15768	8022	9812	14822
10.425	15766	8022	9818	14820.1
10.4333	15766	8020	9824	14820.1
10.4416	15764	8018	9832	14818.2
10.45	15764	8016	9834	14818.2
10.4583	15762	8016	9840	14816.3
10.4666	15762	8014	9844	14816.3
10.475	15760	8010	9850	14814.4
10.4833	15760	8010	9856	14814.4
10.4916	15758	8010	9862	14812.6
10.5	15756	8006	9868	14810.7
10.5083	15752	8006	9874	14806.9
10.5166	15754	8002	9878	14808.8
10.525	15750	8000	9882	14805
10.5333	15748	7998	9886	14803.2
10.5416	15746	7998	9894	14801.3
10.55	15744	7994	9896	14799.4
10.5583	15744	7992	9902	14799.4
10.5666	15740	7990	9906	14795.6
10.575	15740	7990	9910	14795.6
10.5833	15734	7986	9918	14790
10.5916	15730	7984	9920	14786.2
10.6	15730	7986	9928	14786.2
10.6083	15724	7982	9932	14780.6
10.6166	15722	7982	9936	14778.7
10.625	15720	7978	9942	14776.8
10.6333	15714	7976	9946	14771.2
10.6416	15710	7974	9952	14767.4
10.65	15704	7970	9956	14761.8
10.6583	15700	7970	9960	14758
10.6666	15696	7968	9966	14754.3
10.675	15688	7966	9970	14746.8
10.6833	15684	7964	9976	14743
10.6916	15680	7960	9980	14739.2
10.7	15672	7958	9984	14731.7
10.7083	15668	7956	9990	14728
10.7166	15662	7954	9996	14722.3
10.725	15656	7952	10000	14716.7
10.7333	15650	7950	10004	14711
10.7416	15642	7948	10010	14703.5
10.75	15638	7946	10014	14699.8
10.7583	15628	7942	10020	14690.4
10.7666	15624	7940	10022	14686.6
10.775	15616	7938	10028	14679.1
10.7833	15610	7934	10032	14673.4
10.7916	15604	7932	10038	14667.8
10.8	15596	7930	10042	14660.3
10.8083	15588	7928	10046	14652.8
10.8166	15582	7924	10050	14647.1
10.825	15572	7922	10054	14637.7
10.8333	15562	7918	10058	14628.3
10.8416	15556	7914	10062	14622.7
10.85	15548	7914	10068	14615.2
10.8583	15540	7910	10072	14607.6
10.8666	15528	7908	10076	14596.4
10.875	15518	7904	10080	14587
10.8833	15508	7900	10084	14577.6
10.8916	15500	7898	10088	14570
10.9	15492	7896	10094	14562.5
10.9083	15480	7892	10096	14551.2
10.9166	15474	7890	10100	14545.6
10.925	15462	7886	10106	14534.3
10.9333	15452	7884	10110	14524.9
10.9416	15442	7880	10114	14515.5
10.95	15434	7876	10118	14508
10.9583	15426	7874	10122	14500.5
10.9666	15416	7870	10128	14491.1
10.975	15408	7868	10132	14483.6
10.9833	15398	7864	10138	14474.2
10.9916	15384	7860	10140	14461
11	15376	7858	10144	14453.5
11.0083	15364	7854	10148	14442.2
11.0166	15354	7852	10154	14432.8
11.025	15344	7850	10158	14423.4
11.0333	15334	7846	10162	14414
11.0416	15322	7842	10166	14402.7
11.05	15310	7838	10170	14391.4
11.0583	15302	7836	10176	14383.9
11.0666	15290	7832	10178	14372.6
11.075	15280	7830	10184	14363.2
11.0833	15268	7828	10182	14352
11.0916	15254	7824	10188	14338.8
11.1	15244	7822	10192	14329.4
11.1083	15232	7820	10194	14318.1
11.1166	15222	7820	10198	14308.7
11.125	15212	7816	10204	14299.3
11.1333	15200	7814	10206	14288
11.1416	15190	7810	10206	14278.6
11.15	15180	7806	10208	14269.2
11.1583	15164	7802	10214	14254.2
11.1666	15152	7802	10218	14242.9
11.175	15144	7798	10222	14235.4
11.1833	15134	7794	10228	14226
11.1916	15122	7790	10230	14214.7
11.2	15112	7788	10234	14205.3
11.2083	15102	7786	10238	14195.9
11.2166	15092	7782	10242	14186.5
11.225	15080	7782	10246	14175.2
11.2333	15072	7776	10248	14167.7
11.2416	15062	7774	10254	14158.3
11.25	15052	7772	10258	14148.9
11.2583	15042	7766	10262	14139.5
11.2666	15036	7764	10266	14133.9
11.275	15026	7762	10268	14124.5
11.2833	15014	7760	10272	14113.2
11.2916	15008	7756	10276	14107.6
11.3	14998	7752	10280	14098.2
11.3083	14984	7750	10282	14085
11.3166	14978	7748	10288	14079.4
11.325	14970	7744	10290	14071.8
11.3333	14962	7744	10296	14064.3
11.3416	14954	7740	10298	14056.8
11.35	14944	7738	10302	14047.4
11.3583	14938	7736	10304	14041.8
11.3666	14928	7734	10310	14032.4
11.375	14920	7730	10314	14024.8
11.3833	14912	7726	10316	14017.3
11.3916	14900	7726	10322	14006
11.4	14892	7722	10326	13998.5
11.4083	14884	7720	10330	13991
11.4166	14876	7716	10332	13983.5
11.425	14866	7714	10336	13974.1
11.4333	14858	7712	10340	13966.6
11.4416	14852	7708	10342	13960.9
11.45	14844	7706	10348	13953.4
11.4583	14836	7702	10350	13945.9
11.4666	14828	7702	10356	13938.4
11.475	14820	7700	10358	13930.8
11.4833	14814	7694	10362	13925.2
11.4916	14806	7692	10364	13917.7
11.5	14798	7692	10368	13910.2
11.5083	14792	7688	10372	13904.5
11.5166	14786	7688	10374	13898.9
11.525	14780	7684	10378	13893.2
11.5333	14772	7680	10380	13885.7
11.5416	14764	7682	10386	13878.2
11.55	14758	7676	10388	13872.6
11.5583	14748	7676	10394	13863.2
11.5666	14742	7672	10390	13857.5
11.575	14734	7670	10396	13850
11.5833	14728	7668	10398	13844.4
11.5916	14724	7666	10400	13840.6
11.6	14714	7664	10402	13831.2
11.6083	14706	7662	10406	13823.7
11.6166	14700	7658	10412	13818
11.625	14692	7656	10412	13810.5
11.6333	14684	7654	10416	13803
11.6416	14676	7652	10418	13795.5
11.65	14670	7648	10424	13789.8
11.6583	14664	7648	10424	13784.2
11.6666	14656	7644	10430	13776.7
11.675	14648	7642	10432	13769.2
11.6833	14638	7638	10436	13759.8
11.6916	14632	7636	10438	13754.1
11.7	14626	7634	10442	13748.5
11.7083	14620	7630	10444	13742.8
11.7166	14610	7630	10448	13733.4
11.725	14604	7628	10452	13727.8
11.7333	14598	7624	10454	13722.2
11.7416	14592	7622	10458	13716.5
11.75	14584	7620	10460	13709
11.7583	14580	7618	10464	13705.2
11.7666	14572	7616	10466	13697.7
11.775	14566	7612	10470	13692.1
11.7833	14558	7610	10474	13684.6
11.7916	14554	7608	10478	13680.8
11.8	14544	7608	10482	13671.4
11.8083	14538	7606	10486	13665.8
11.8166	14534	7604	10488	13662
11.825	14528	7602	10490	13656.4
11.8333	14520	7598	10492	13648.8
11.8416	14514	7596	10496	13643.2
11.85	14506	7594	10498	13635.7
11.8583	14502	7592	10500	13631.9
11.8666	14496	7590	10504	13626.3
11.875	14490	7588	10508	13620.6
11.8833	14480	7586	10514	13611.2
11.8916	14476	7582	10518	13607.5
11.9	14470	7582	10520	13601.8
11.9083	14462	7578	10524	13594.3
11.9166	14456	7576	10528	13588.7
11.925	14450	7574	10532	13583
11.9333	14444	7574	10534	13577.4
11.9416	14438	7570	10536	13571.8
11.95	14430	7568	10542	13564.2
11.9583	14424	7566	10546	13558.6
11.9666	14420	7564	10546	13554.8
11.975	14412	7562	10552	13547.3
11.9833	14406	7558	10554	13541.7
11.9916	14400	7556	10556	13536
12	14394	7556	10562	13530.4
12.0083	14384	7552	10564	13521
12.0166	14378	7550	10566	13515.4
12.025	14372	7548	10568	13509.7
12.0333	14368	7546	10570	13506
12.0416	14360	7542	10576	13498.4
12.05	14354	7542	10578	13492.8
12.0583	14350	7540	10580	13489
12.0666	14346	7538	10582	13485.3
12.075	14338	7536	10584	13477.8
12.0833	14334	7534	10588	13474
12.0916	14330	7532	10590	13470.2
12.1	14324	7530	10592	13464.6
12.1083	14320	7528	10594	13460.8
12.1166	14314	7526	10602	13455.2
12.125	14312	7524	10602	13453.3
12.1333	14302	7524	10604	13443.9
12.1416	14300	7520	10608	13442
12.15	14294	7518	10610	13436.4
12.1583	14288	7516	10612	13430.8
12.1666	14286	7516	10614	13428.9
12.175	14280	7514	10614	13423.2
12.1833	14278	7512	10618	13421.4
12.1916	14274	7508	10622	13417.6
12.2	14272	7508	10622	13415.7
12.2083	14266	7504	10622	13410.1
12.2166	14266	7504	10626	13410.1
12.225	14262	7500	10628	13406.3
12.2333	14258	7498	10632	13402.6
12.2416	14256	7498	10634	13400.7
12.25	14252	7496	10636	13396.9
12.2583	14250	7494	10638	13395
12.2666	14246	7494	10640	13391.3
12.275	14244	7490	10642	13389.4
12.2833	14242	7488	10642	13387.5
12.2916	14238	7486	10644	13383.8
12.3	14236	7482	10648	13381.9
12.3083	14234	7484	10650	13380
12.3166	14232	7482	10652	13378.1
12.325	14228	7482	10654	13374.4
12.3333	14228	7478	10656	13374.4
12.3416	14226	7476	10656	13372.5
12.35	14220	7474	10658	13366.8
12.3583	14210	7454	11266	13357.4
12.3666	13696	7386	11480	12874.3
12.375	13662	7396	11536	12842.3
12.3833	13646	7412	11580	12827.3
12.3916	13634	7420	11612	12816
12.4	13630	7424	11644	12812.2
12.4083	13628	7430	11664	12810.4
12.4166	13626	7438	11684	12808.5
12.425	13626	7440	11712	12808.5
12.4333	13628	7442	11732	12810.4
12.4416	13634	7444	11750	12816
12.45	13638	7448	11772	12819.8
12.4583	13644	7448	11838	12825.4
12.4666	13650	7450	11862	12831
12.475	13654	7454	11880	12834.8
12.4833	13664	7454	11894	12844.2
12.4916	13670	7454	11908	12849.8
12.5	13678	7456	11926	12857.4
12.5083	13684	7458	11940	12863
12.5166	13692	7458	11956	12870.5
12.525	13702	7462	11974	12879.9
12.5333	13712	7464	11990	12889.3
12.5416	13720	7464	12006	12896.8
12.55	13730	7466	12020	12906.2
12.5583	13740	7468	12034	12915.6
12.5666	13750	7468	12048	12925
12.575	13758	7466	12056	12932.6
12.5833	13768	7466	12068	12942
12.5916	13778	7470	12082	12951.4
12.6	13788	7470	12098	12960.8
12.6083	13798	7472	12110	12970.2
12.6166	13806	7472	12124	12977.7
12.625	13814	7474	12136	12985.2
12.6333	13824	7474	12150	12994.6
12.6416	13834	7474	12166	13004
12.65	13840	7474	12180	13009.6
12.6583	13848	7474	12192	13017.2
12.6666	13856	7474	12206	13024.7
12.675	13864	7474	12214	13032.2
12.6833	13870	7476	12226	13037.8
12.6916	13878	7476	12240	13045.4
12.7	13886	7478	12252	13052.9
12.7083	13894	7476	12262	13060.4
12.7166	13900	7476	12272	13066
12.725	13906	7476	12286	13071.7
12.7333	13912	7478	12298	13077.3
12.7416	13918	7476	12308	13083
12.75	13924	7476	12320	13088.6
12.7583	13930	7476	12330	13094.2
12.7666	13936	7478	12340	13099.9
12.775	13942	7476	12350	13105.5
12.7833	13948	7476	12362	13111.2
12.7916	13954	7476	12374	13116.8
12.8	13960	7476	12388	13122.4
12.8083	13966	7478	12394	13128.1
12.8166	13970	7476	12406	13131.8
12.825	13976	7476	12416	13137.5
12.8333	13982	7476	12426	13143.1
12.8416	13986	7476	12436	13146.9
12.85	13990	7476	12446	13150.6
12.8583	13996	7476	12456	13156.3
12.8666	14000	7476	12466	13160
12.875	14006	7474	12478	13165.7
12.8833	14012	7476	12502	13171.3
12.8916	14016	7476	12522	13175.1
12.9	14022	7478	12536	13180.7
12.9083	14026	7478	12548	13184.5
12.9166	14032	7480	12558	13190.1
12.925	14042	7484	12584	13199.5
12.9333	14046	7488	12594	13203.3
12.9416	14052	7490	12602	13208.9
12.95	14056	7494	12612	13212.7
12.9583	14060	7494	12622	13216.4
12.9666	14066	7496	12632	13222.1
12.975	14068	7496	12642	13224
12.9833	14074	7498	12650	13229.6
12.9916	14076	7496	12658	13231.5
13	14080	7496	12666	13235.2
13.0083	14084	7496	12674	13239
13.0166	14084	7498	12682	13239
13.025	14090	7496	12690	13244.6
13.0333	14094	7496	12698	13248.4
13.0416	14092	7496	12704	13246.5
13.05	14094	7496	12712	13248.4
13.0583	14096	7494	12718	13250.3
13.0666	14098	7494	12726	13252.2
13.075	14102	7494	12732	13255.9
13.0833	14102	7494	12738	13255.9
13.0916	14104	7492	12746	13257.8
13.1	14104	7492	12754	13257.8
13.1083	14106	7490	12760	13259.7
13.1166	14108	7490	12768	13261.6
13.125	14110	7490	12774	13263.4
13.1333	14110	7488	12780	13263.4
13.1416	14112	7488	12788	13265.3
13.15	14112	7486	12792	13265.3
13.1583	14114	7486	12800	13267.2
13.1666	14114	7484	12808	13267.2
13.175	14114	7484	12814	13267.2
13.1833	14114	7482	12822	13267.2
13.1916	14114	7482	12826	13267.2
13.2	14116	7480	12834	13269.1
13.2083	14116	7478	12842	13269.1
13.2166	14114	7478	12846	13267.2
13.225	14114	7478	12852	13267.2
13.2333	14114	7478	12858	13267.2
13.2416	14114	7474	12864	13267.2
13.25	14114	7476	12872	13267.2
13.2583	14114	7474	12876	13267.2
13.2666	14114	7472	12884	13267.2
13.275	14112	7472	12890	13265.3
13.2833	14108	7472	12896	13261.6
13.2916	14108	7468	12904	13261.6
13.3	14108	7466	12912	13261.6
13.3083	14106	7466	12918	13259.7
13.3166	14106	7466	12924	13259.7
13.325	14104	7464	12930	13257.8
13.3333	14104	7462	12936	13257.8
13.3416	14102	7462	12942	13255.9
13.35	14102	7460	12950	13255.9
13.3583	14100	7460	12956	13254
13.3666	14102	7456	12962	13255.9
13.375	14100	7456	12970	13254
13.3833	14098	7456	12974	13252.2
13.3916	14098	7454	12978	13252.2
13.4	14098	7452	12984	13252.2
13.4083	14098	7450	12990	13252.2
13.4166	14096	7450	12996	13250.3
13.425	14096	7448	13002	13250.3
13.4333	14094	7448	13010	13248.4
13.4416	14094	7446	13016	13248.4
13.45	14094	7446	13022	13248.4
13.4583	14094	7444	13028	13248.4
13.4666	14092	7444	13034	13246.5
13.475	14092	7440	13040	13246.5
13.4833	14092	7442	13046	13246.5
13.4916	14090	7438	13052	13244.6
13.5	14090	7438	13056	13244.6
13.5083	14086	7438	13062	13240.9
13.5166	14084	7436	13066	13239
13.525	14084	7434	13072	13239
13.5333	14084	7432	13078	13239
13.5416	14084	7432	13084	13239
13.55	14082	7432	13090	13237.1
13.5583	14082	7430	13094	13237.1
13.5666	14082	7428	13098	13237.1
13.575	14078	7428	13102	13233.4
13.5833	14078	7426	13108	13233.4
13.5916	14078	7422	13114	13233.4
13.6	14078	7422	13118	13233.4
13.6083	14078	7422	13124	13233.4
13.6166	14076	7420	13128	13231.5
13.625	14076	7420	13134	13231.5
13.6333	14074	7418	13138	13229.6
13.6416	14072	7416	13144	13227.7
13.65	14070	7416	13148	13225.8
13.6583	14070	7414	13152	13225.8
13.6666	14070	7412	13158	13225.8
13.675	14066	7412	13162	13222.1
13.6833	14066	7412	13166	13222.1
13.6916	14066	7408	13172	13222.1
13.7	14062	7406	13176	13218.3
13.7083	14062	7408	13180	13218.3
13.7166	14060	7406	13184	13216.4
13.725	14056	7404	13190	13212.7
13.7333	14056	7402	13194	13212.7
13.7416	14054	7400	13198	13210.8
13.75	14050	7400	13202	13207
13.7583	14048	7398	13206	13205.2
13.7666	14046	7396	13210	13203.3
13.775	14044	7396	13214	13201.4
13.7833	14042	7394	13218	13199.5
13.7916	14040	7394	13222	13197.6
13.8	14038	7392	13224	13195.8
13.8083	14036	7390	13226	13193.9
13.8166	14032	7390	13230	13190.1
13.825	14030	7388	13232	13188.2
13.8333	14026	7388	13238	13184.5
13.8416	14024	7386	13240	13182.6
13.85	14022	7386	13240	13180.7
13.8583	14018	7386	13244	13177
13.8666	14016	7384	13246	13175.1
13.875	14014	7384	13258	13173.2
13.8833	14010	7380	13262	13169.4
13.8916	14008	7378	13264	13167.6
13.9	14008	7378	13266	13167.6
13.9083	14004	7376	13270	13163.8
13.9166	14002	7376	13272	13161.9
13.925	14000	7372	13274	13160
13.9333	14000	7374	13278	13160
13.9416	13998	7370	13282	13158.2
13.95	13996	7370	13284	13156.3
13.9583	13994	7370	13286	13154.4
13.9666	13990	7368	13290	13150.6
13.975	13990	7366	13294	13150.6
13.9833	13986	7366	13296	13146.9
13.9916	13986	7364	13298	13146.9
14	13984	7364	13302	13145
14.0083	13980	7362	13306	13141.2
14.0166	13980	7360	13310	13141.2
14.025	13980	7360	13312	13141.2
14.0333	13974	7358	13314	13135.6
14.0416	13974	7356	13318	13135.6
14.05	13972	7356	13320	13133.7
14.0583	13972	7354	13322	13133.7
14.0666	13970	7352	13326	13131.8
14.075	13968	7354	13328	13130
14.0833	13966	7352	13326	13128.1
14.0916	13964	7350	13328	13126.2
14.1	13964	7348	13332	13126.2
14.1083	13962	7348	13334	13124.3
14.1166	13962	7348	13336	13124.3
14.125	13958	7346	13340	13120.6
14.1333	13956	7348	13342	13118.7
14.1416	13956	7344	13344	13118.7
14.15	13954	7344	13346	13116.8
14.1583	13952	7344	13346	13114.9
14.1666	13952	7342	13348	13114.9
14.175	13952	7342	13350	13114.9
14.1833	13952	7340	13354	13114.9
14.1916	13952	7338	13356	13114.9
14.2	13952	7338	13358	13114.9
14.2083	13950	7336	13360	13113
14.2166	13950	7334	13362	13113
14.225	13948	7334	13364	13111.2
14.2333	13950	7334	13366	13113
14.2416	13948	7332	13368	13111.2
14.25	13950	7332	13370	13113
14.2583	13950	7330	13372	13113
14.2666	13948	7330	13376	13111.2
14.275	13948	7330	13376	13111.2
14.2833	13948	7328	13378	13111.2
14.2916	13948	7328	13380	13111.2
14.3	13948	7328	13382	13111.2
14.3083	13946	7326	13382	13109.3
14.3166	13948	7328	13370	13111.2
14.325	13946	7328	13372	13109.3
14.3333	13946	7326	13372	13109.3
14.3416	13946	7326	13372	13109.3
14.35	13946	7326	13372	13109.3
14.3583	13944	7324	13374	13107.4
14.3666	13942	7328	13374	13105.5
14.375	13944	7324	13372	13107.4
14.3833	13946	7324	13372	13109.3
14.3916	13946	7324	13372	13109.3
14.4	13946	7322	13370	13109.3
14.4083	13946	7324	13370	13109.3
14.4166	13944	7324	13368	13107.4
14.425	13944	7322	13364	13107.4
14.4333	13942	7324	13362	13105.5
14.4416	13944	7324	13360	13107.4
14.45	13946	7322	13360	13109.3
14.4583	13944	7322	13356	13107.4
14.4666	13942	7322	13352	13105.5
14.475	13940	7322	13348	13103.6
14.4833	13942	7322	13346	13105.5
14.4916	13938	7322	13340	13101.8
14.5	13920	7330	13324	13084.8
14.5083	13654	7526	13136	12834.8
14.5166	13440	7536	13122	12633.6
14.525	13370	7534	13114	12567.8
14.5333	13312	7528	13104	12513.3
14.5416	13272	7526	13100	12475.7
14.55	13240	7522	13096	12445.6
14.5583	13210	7518	13088	12417.4
14.5666	13180	7518	13086	12389.2
14.575	13154	7516	13078	12364.8
14.5833	13132	7514	13076	12344.1
14.5916	13112	7514	13072	12325.3
14.6	13094	7514	13070	12308.4
14.6083	13074	7514	13068	12289.6
14.6166	13058	7512	13066	12274.6
14.625	13042	7512	13064	12259.5
14.6333	13026	7514	13062	12244.5
14.6416	13008	7514	13064	12227.6
14.65	12992	7512	13062	12212.5
14.6583	12978	7512	13060	12199.4
14.6666	12966	7514	13060	12188.1
14.675	12956	7514	13058	12178.7
14.6833	12942	7514	13058	12165.5
14.6916	12930	7514	13054	12154.2
14.7	12918	7516	13052	12143
14.7083	12908	7518	13048	12133.6
14.7166	12900	7520	13044	12126
14.725	12894	7522	13040	12120.4
14.7333	12886	7526	13036	12112.9
14.7416	12882	7526	13030	12109.1
14.75	12876	7530	13024	12103.5
14.7583	12874	7532	13018	12101.6
14.7666	12870	7534	13010	12097.8
14.775	12866	7538	13004	12094.1
14.7833	12860	7540	12994	12088.4
14.7916	12856	7542	12988	12084.7
14.8	12848	7546	12982	12077.2
14.8083	12844	7546	12974	12073.4
14.8166	12836	7548	12970	12065.9
14.825	12830	7548	12962	12060.2
14.8333	12818	7552	12956	12049
14.8416	12810	7552	12950	12041.4
14.85	12802	7554	12942	12033.9
14.8583	12796	7554	12936	12028.3
14.8666	12784	7554	12930	12017
14.875	12776	7556	12922	12009.5
14.8833	12766	7558	12912	12000.1
14.8916	12752	7562	12904	11986.9
14.9	12742	7568	12894	11977.5
14.9083	12736	7570	12886	11971.9
14.9166	12722	7574	12880	11958.7
14.925	12716	7578	12874	11953.1
14.9333	12706	7584	12868	11943.7
14.9416	12658	7586	12872	11898.6
14.95	12644	7598	12858	11885.4
14.9583	12622	7602	12846	11864.7
14.9666	12606	7606	12842	11849.7
14.975	12586	7610	12834	11830.9
14.9833	12566	7614	12824	11812.1
14.9916	12546	7618	12818	11793.3
15	12528	7620	12808	11776.4
15.0083	12510	7624	12798	11759.4
15.0166	12490	7626	12790	11740.6
15.025	12476	7632	12782	11727.5
15.0333	12454	7636	12774	11706.8
15.0416	12434	7640	12766	11688
15.05	12416	7642	12758	11671.1
15.0583	12400	7646	12748	11656
15.0666	12380	7648	12740	11637.2
15.075	12364	7650	12736	11622.2
15.0833	12344	7652	12728	11603.4
15.0916	12324	7654	12720	11584.6
15.1	12306	7658	12714	11567.7
15.1083	12288	7660	12708	11550.8
15.1166	12268	7664	12702	11532
15.125	12252	7666	12694	11516.9
15.1333	12234	7670	12688	11500
15.1416	12216	7672	12680	11483.1
15.15	12196	7674	12674	11464.3
15.1583	12182	7678	12668	11451.1
15.1666	12168	7680	12662	11438
15.175	12152	7684	12652	11422.9
15.1833	12136	7692	12644	11407.9
15.1916	12118	7698	12636	11391
15.2	12108	7702	12630	11381.6
15.2083	12094	7710	12624	11368.4
15.2166	12080	7718	12616	11355.2
15.225	12066	7730	12608	11342.1
15.2333	12054	7740	12600	11330.8
15.2416	12038	7750	12592	11315.8
15.25	12028	7764	12588	11306.4
15.2583	12018	7774	12582	11297
15.2666	12006	7786	12576	11285.7
15.275	11996	7800	12570	11276.3
15.2833	11986	7808	12564	11266.9
15.2916	11976	7820	12556	11257.5
15.3	11968	7826	12552	11250
15.3083	11958	7834	12546	11240.6
15.3166	11952	7840	12540	11234.9
15.325	11942	7850	12534	11225.5
15.3333	11932	7858	12526	11216.1
15.3416	11924	7866	12522	11208.6
15.35	11916	7874	12516	11201.1
15.3583	11904	7880	12508	11189.8
15.3666	11898	7886	12504	11184.2
15.375	11890	7894	12498	11176.6
15.3833	11880	7898	12490	11167.2
15.3916	11874	7904	12484	11161.6
15.4	11862	7916	12480	11150.3
15.4083	11852	7926	12474	11140.9
15.4166	11844	7932	12468	11133.4
15.425	11832	7938	12462	11122.1
15.4333	11822	7946	12458	11112.7
15.4416	11810	7956	12452	11101.4
15.45	11802	7964	12446	11093.9
15.4583	11794	7970	12442	11086.4
15.4666	11782	7978	12436	11075.1
15.475	11774	7988	12430	11067.6
15.4833	11766	7992	12426	11060.1
15.4916	11758	8000	12422	11052.6
15.5	11750	8006	12412	11045
15.5083	11742	8012	12408	11037.5
15.5166	11734	8018	12402	11030
15.525	11724	8026	12398	11020.6
15.5333	11716	8028	12392	11013.1
15.5416	11710	8032	12386	11007.4
15.55	11702	8036	12380	10999.9
15.5583	11692	8040	12374	10990.5
15.5666	11686	8044	12370	10984.9
15.575	11676	8048	12364	10975.5
15.5833	11668	8050	12358	10968
15.5916	11662	8054	12356	10962.3
15.6	11652	8058	12350	10952.9
15.6083	11638	8078	12344	10939.8
15.6166	11620	8096	12342	10922.8
15.625	11610	8106	12338	10913.4
15.6333	11600	8112	12334	10904
15.6416	11594	8118	12330	10898.4
15.65	11584	8122	12328	10889
15.6583	11576	8128	12322	10881.5
15.6666	11568	8132	12316	10874
15.675	11562	8136	12312	10868.3
15.6833	11556	8140	12308	10862.7
15.6916	11546	8142	12302	10853.3
15.7	11540	8144	12298	10847.6
15.7083	11532	8148	12292	10840.1
15.7166	11526	8150	12286	10834.5
15.725	11518	8154	12282	10827
15.7333	11512	8156	12278	10821.3
15.7416	11506	8158	12272	10815.7
15.75	11496	8160	12268	10806.3
15.7583	11490	8164	12264	10800.6
15.7666	11482	8166	12258	10793.1
15.775	11478	8170	12254	10789.4
15.7833	11470	8172	12250	10781.8
15.7916	11460	8174	12246	10772.4
15.8	11454	8176	12242	10766.8
15.8083	11448	8178	12236	10761.2
15.8166	11444	8182	12232	10757.4
15.825	11436	8182	12226	10749.9
15.8333	11426	8182	12222	10740.5
15.8416	11418	8186	12218	10733
15.85	11412	8188	12214	10727.3
15.8583	11402	8190	12210	10717.9
15.8666	11398	8192	12208	10714.2
15.875	11390	8194	12204	10706.6
15.8833	11382	8198	12200	10699.1
15.8916	11376	8200	12198	10693.5
15.9	11370	8204	12194	10687.8
15.9083	11364	8208	12188	10682.2
15.9166	11356	8214	12186	10674.7
15.925	11348	8222	12184	10667.2
15.9333	11342	8230	12182	10661.5
15.9416	11334	8236	12178	10654
15.95	11328	8240	12176	10648.4
15.9583	11322	8244	12172	10642.7
15.9666	11316	8248	12168	10637.1
15.975	11310	8252	12164	10631.4
15.9833	11304	8256	12162	10625.8
15.9916	11298	8262	12158	10620.2
16	11292	8264	12154	10614.5
16.0083	11286	8268	12152	10608.9
16.0166	11282	8270	12148	10605.1
16.025	11276	8274	12146	10599.5
16.0333	11270	8278	12142	10593.8
16.0416	11262	8282	12138	10586.3
16.05	11258	8282	12134	10582.6
16.0583	11254	8288	12132	10578.8
16.0666	11250	8288	12130	10575
16.075	11242	8292	12126	10567.5
16.0833	11238	8294	12122	10563.8
16.0916	11234	8298	12120	10560
16.1	11230	8302	12116	10556.2
16.1083	11228	8304	12112	10554.4
16.1166	11222	8308	12112	10548.7
16.125	11216	8310	12106	10543.1
16.1333	11212	8314	12104	10539.3
16.1416	11204	8316	12100	10531.8
16.15	11202	8318	12098	10529.9
16.1583	11194	8322	12094	10522.4
16.1666	11192	8324	12092	10520.5
16.175	11188	8328	12088	10516.8
16.1833	11182	8330	12086	10511.1
16.1916	11180	8330	12082	10509.2
16.2	11176	8334	12078	10505.5
16.2083	11172	8338	12076	10501.7
16.2166	11168	8340	12072	10498
16.225	11168	8342	12068	10498
16.2333	11164	8346	12066	10494.2
16.2416	11160	8350	12064	10490.4
16.25	11156	8352	12062	10486.7
16.2583	11152	8354	12056	10482.9
16.2666	11148	8358	12056	10479.2
16.275	11144	8360	12052	10475.4
16.2833	11140	8364	12048	10471.6
16.2916	11138	8366	12044	10469.8
16.3	11136	8368	12042	10467.9
16.3083	11134	8372	12038	10466
16.3166	11130	8374	12036	10462.2
16.325	11128	8378	12032	10460.4
16.3333	11126	8378	12028	10458.5
16.3416	11124	8382	12026	10456.6
16.35	11120	8386	12020	10452.8
16.3583	11116	8388	12018	10449.1
16.3666	11114	8390	12014	10447.2
16.375	11112	8392	12012	10445.3
16.3833	11110	8396	12006	10443.4
16.3916	11110	8400	12004	10443.4
16.4	11108	8402	12000	10441.6
16.4083	11106	8404	11998	10439.7
16.4166	11106	8408	11994	10439.7
16.425	11110	8410	11992	10443.4
16.4333	11112	8412	11988	10445.3
16.4416		8412	11986
16.45		8416	11984
16.4583		8416	11980
16.4666		8420	11978
16.475		8422	11974
16.4833		8426	11972
16.4916		8428	11970
16.5		8432	11968
16.5083		8434	11964
16.5166		8438	11962
16.525		8438	11962
16.5333		8442	11958
16.5416		8444	11954
16.55		8450	11954
16.5583		8452	11950
16.5666		8456	11948
16.575		8458	11944
16.5833		8462	11942
16.5916		8464	11940
16.6		8468	11938
16.6083		8470	11936
16.6166		8472	11934
16.625		8476	11930
16.6333		8480	11930
16.6416		8482	11930
[truncated: 722 more rows]

## Sheet: coated GFRP fixed with soil
displacement	Strain
	Head_grout	Mid1_grout	Mid2_grout	End_grout
0	0	0	0	0
0.0083	0	0	0	2
0.0166	0	4	0	2
0.025	0	2	2	2
0.0333	2	2	0	0
0.0416	0	2	0	2
0.05	0	4	2	2
0.0583	0	4	2	2
0.0666	0	4	2	2
0.075	0	6	2	4
0.0833	0	6	2	2
0.0916	2	6	2	2
0.1	2	8	2	2
0.1083	0	4	4	2
0.1166	4	10	8	4
0.125	8	16	14	2
0.1333	10	22	18	2
0.1416	12	28	22	4
0.15	16	32	26	4
0.1583	16	36	30	2
0.1666	20	42	38	4
0.175	22	48	40	2
0.1833	24	54	44	4
0.1916	28	58	48	0
0.2	32	64	52	2
0.2083	32	68	56	2
0.2166	34	74	60	2
0.225	38	78	64	0
0.2333	40	84	68	2
0.2416	44	88	74	0
0.25	48	94	76	2
0.2583	50	100	80	2
0.2666	54	104	84	4
0.275	58	110	88	6
0.2833	60	116	92	6
0.2916	62	122	100	6
0.3	66	128	100	11
0.3083	70	134	106	14
0.3166	76	140	112	14
0.325	78	144	114	18
0.3333	82	152	118	18
0.3416	86	158	124	20
0.35	90	162	128	20
0.3583	94	168	132	27
0.3666	98	176	136	27
0.375	104	182	140	32
0.3833	108	188	146	32
0.3916	114	194	150	36
0.4	118	200	154	41
0.4083	120	206	156	41
0.4166	126	210	162	45
0.425	130	220	166	45
0.4333	134	226	172	50
0.4416	138	232	176	54
0.45	144	236	178	54
0.4583	150	244	182	59
0.4666	150	246	186	61
0.475	158	256	192	66
0.4833	162	260	196	68
0.4916	166	266	200	72
0.5	170	272	206	75
0.5083	176	280	208	79
0.5166	180	284	212	81
0.525	184	288	216	86
0.5333	190	296	220	86
0.5416	196	300	226	93
0.55	198	306	230	93
0.5583	204	314	234	100
0.5666	210	318	240	102
0.575	216	326	244	106
0.5833	222	332	248	109
0.5916	224	338	252	115
0.6	232	344	256	118
0.6083	238	352	262	122
0.6166	242	358	266	127
0.625	250	362	272	131
0.6333	254	378	276	133
0.6416	260	378	280	138
0.65	266	384	286	142
0.6583	276	394	292	147
0.6666	278	400	294	152
0.675	286	408	298	154
0.6833	292	412	302	158
0.6916	296	418	308	163
0.7	304	424	312	165
0.7083	308	432	318	170
0.7166	314	440	322	172
0.725	320	448	328	179
0.7333	326	452	330	183
0.7416	334	458	336	188
0.75	338	466	340	192
0.7583	346	474	346	197
0.7666	352	478	350	201
0.775	358	486	356	206
0.7833	366	496	360	213
0.7916	372	502	364	217
0.8	378	508	370	222
0.8083	384	514	376	228
0.8166	390	524	378	231
0.825	398	530	384	237
0.8333	406	538	390	240
0.8416	412	544	394	246
0.85	418	552	398	253
0.8583	424	558	404	255
0.8666	434	566	410	265
0.875	440	574	416	269
0.8833	448	582	420	276
0.8916	454	588	426	278
0.9	462	598	432	285
0.9083	470	606	438	292
0.9166	478	614	444	296
0.925	486	620	450	303
0.9333	492	630	456	310
0.9416	500	636	462	312
0.95	506	644	466	323
0.9583	514	652	472	326
0.9666	522	658	476	332
0.975	530	668	482	339
0.9833	538	676	488	344
0.9916	546	682	492	350
1	554	692	498	355
1.0083	564	698	504	362
1.0166	570	708	508	368
1.025	578	714	514	375
1.0333	586	722	518	380
1.0416	594	732	524	384
1.05	604	740	530	393
1.0583	612	750	534	398
1.0666	620	758	538	402
1.075	628	768	544	409
1.0833	636	774	550	418
1.0916	644	780	554	420
1.1	650	788	560	429
1.1083	658	798	564	432
1.1166	666	806	570	441
1.125	674	812	574	450
1.1333	682	820	582	454
1.1416	688	830	588	463
1.15	696	838	590	468
1.1583	704	842	596	472
1.1666	712	850	604	481
1.175	720	860	610	488
1.1833	726	868	614	493
1.1916	736	876	620	497
1.2	744	882	626	506
1.2083	750	892	632	513
1.2166	758	898	638	520
1.225	766	906	642	527
1.2333	774	916	646	533
1.2416	784	922	652	540
1.25	788	932	658	547
1.2583	798	940	664	552
1.2666	806	948	668	558
1.275	814	954	674	563
1.2833	824	964	678	572
1.2916	830	972	686	579
1.3	838	978	692	583
1.3083	844	986	696	592
1.3166	854	994	700	597
1.325	860	1002	708	606
1.3333	870	1010	712	610
1.3416	876	1018	718	619
1.35	884	1026	724	626
1.3583	894	1036	732	633
1.3666	898	1042	736	640
1.375	908	1050	740	646
1.3833	918	1058	748	653
1.3916	924	1066	752	660
1.4	932	1074	758	667
1.4083	942	1082	764	671
1.4166	948	1090	770	680
1.425	956	1098	776	689
1.4333	964	1106	782	694
1.4416	972	1112	788	703
1.45	980	1122	794	710
1.4583	990	1130	800	719
1.4666	996	1136	804	723
1.475	1004	1144	812	732
1.4833	1012	1152	818	739
1.4916	1020	1160	822	748
1.5	1026	1168	828	755
1.5083	1036	1174	832	762
1.5166	1044	1186	838	768
1.525	1054	1192	844	780
1.5333	1060	1198	850	784
1.5416	1066	1208	856	793
1.55	1076	1216	862	800
1.5583	1084	1224	868	807
1.5666	1092	1230	874	814
1.575	1100	1236	880	820
1.5833	1108	1244	884	827
1.5916	1116	1252	892	839
1.6	1124	1262	898	845
1.6083	1130	1266	904	850
1.6166	1140	1276	910	857
1.625	1148	1284	916	866
1.6333	1154	1290	920	870
1.6416	1164	1300	926	877
1.65	1172	1308	934	886
1.6583	1178	1314	938	891
1.6666	1186	1322	944	897
1.675	1194	1330	950	906
1.6833	1204	1336	956	915
1.6916	1208	1346	962	920
1.7	1218	1354	966	929
1.7083	1224	1360	974	933
1.7166	1232	1368	980	943
1.725	1240	1374	986	949
1.7333	1250	1384	992	958
1.7416	1256	1390	998	965
1.75	1266	1400	1004	972
1.7583	1274	1408	1010	981
1.7666	1284	1416	1016	988
1.775	1290	1424	1022	997
1.7833	1298	1432	1028	1001
1.7916	1306	1438	1034	1010
1.8	1312	1446	1040	1017
1.8083	1320	1454	1046	1024
1.8166	1330	1460	1052	1033
1.825	1338	1468	1056	1040
1.8333	1346	1476	1064	1046
1.8416	1352	1484	1070	1056
1.85	1360	1492	1076	1062
1.8583	1368	1498	1082	1071
1.8666	1374	1504	1088	1078
1.875	1382	1512	1094	1085
1.8833	1388	1518	1100	1096
1.8916	1394	1526	1108	1103
1.9	1402	1532	1114	1110
1.9083	1406	1538	1122	1117
1.9166	1414	1546	1126	1123
1.925	1420	1550	1134	1130
1.9333	1426	1558	1140	1139
1.9416	1434	1566	1148	1148
1.95	1440	1570	1154	1155
1.9583	1446	1576	1160	1162
1.9666	1454	1584	1168	1171
1.975	1460	1592	1172	1178
1.9833	1468	1596	1180	1187
1.9916	1472	1600	1186	1196
2	1478	1608	1194	1205
2.0083	1484	1614	1200	1211
2.0166	1492	1618	1208	1218
2.025	1498	1626	1214	1227
2.0333	1504	1632	1222	1234
2.0416	1510	1640	1226	1241
2.05	1516	1644	1234	1252
2.0583	1522	1652	1240	1257
2.0666	1532	1660	1248	1263
2.075	1540	1666	1254	1272
2.0833	1546	1672	1260	1279
2.0916	1554	1678	1266	1286
2.1	1558	1684	1274	1293
2.1083	1568	1692	1280	1302
2.1166	1574	1698	1288	1313
2.125	1582	1704	1294	1320
2.1333	1590	1710	1300	1327
2.1416	1598	1718	1304	1336
2.15	1604	1724	1310	1345
2.1583	1610	1732	1318	1352
2.1666	1616	1738	1324	1361
2.175	1626	1746	1332	1365
2.1833	1630	1750	1338	1372
2.1916	1638	1758	1342	1383
2.2	1644	1764	1350	1392
2.2083	1654	1772	1358	1399
2.2166	1658	1778	1364	1408
2.225	1666	1784	1370	1415
2.2333	1672	1790	1378	1424
2.2416	1680	1796	1384	1435
2.25	1688	1804	1392	1442
2.2583	1694	1808	1398	1451
2.2666	1700	1814	1406	1458
2.275	1708	1822	1414	1467
2.2833	1714	1828	1420	1474
2.2916	1722	1836	1424	1483
2.3	1730	1842	1432	1492
2.3083	1736	1848	1438	1498
2.3166	1744	1856	1444	1508
2.325	1752	1862	1452	1514
2.3333	1758	1870	1460	1523
2.3416	1766	1876	1466	1532
2.35	1772	1882	1472	1539
2.3583	1780	1888	1478	1548
2.3666	1788	1896	1484	1557
2.375	1794	1902	1492	1564
2.3833	1804	1908	1500	1573
2.3916	1810	1916	1506	1580
2.4	1818	1922	1512	1589
2.4083	1824	1932	1520	1596
2.4166	1830	1936	1526	1605
2.425	1838	1940	1534	1614
2.4333	1846	1948	1540	1621
2.4416	1852	1954	1546	1630
2.45	1860	1960	1552	1639
2.4583	1868	1968	1558	1648
2.4666	1872	1974	1564	1654
2.475	1880	1980	1572	1663
2.4833	1888	1990	1578	1675
2.4916	1896	1996	1586	1682
2.5	1904	2002	1594	1691
2.5083	1910	2008	1600	1700
2.5166	1918	2014	1606	1706
2.525	1924	2022	1612	1713
2.5333	1932	2028	1618	1724
2.5416	1940	2036	1626	1734
2.55	1948	2044	1632	1740
2.5583	1956	2048	1638	1752
2.5666	1964	2056	1646	1758
2.575	1970	2062	1652	1765
2.5833	1980	2070	1660	1772
2.5916	1984	2076	1666	1781
2.6	1994	2084	1672	1790
2.6083	2004	2090	1680	1799
2.6166	2010	2096	1686	1806
2.625	2018	2104	1694	1815
2.6333	2024	2110	1702	1822
2.6416	2034	2118	1706	1831
2.65	2040	2126	1714	1837
2.6583	2046	2130	1720	1847
2.6666	2054	2138	1726	1856
2.675	2062	2144	1732	1865
2.6833	2072	2152	1738	1871
2.6916	2078	2160	1744	1883
2.7	2088	2166	1750	1892
2.7083	2096	2172	1758	1898
2.7166	2100	2180	1766	1908
2.725	2110	2186	1772	1917
2.7333	2116	2194	1778	1926
2.7416	2124	2200	1786	1935
2.75	2130	2208	1792	1941
2.7583	2138	2214	1800	1950
2.7666	2146	2220	1806	1957
2.775	2154	2226	1812	1964
2.7833	2162	2234	1818	1973
2.7916	2172	2240	1826	1982
2.8	2180	2248	1832	1991
2.8083	2188	2252	1838	1998
2.8166	2192	2260	1844	2005
2.825	2200	2266	1850	2016
2.8333	2210	2274	1858	2025
2.8416	2214	2280	1866	2034
2.85	2226	2286	1870	2043
2.8583	2234	2294	1878	2052
2.8666	2240	2300	1884	2059
2.875	2248	2308	1892	2068
2.8833	2258	2314	1898	2079
2.8916	2266	2322	1904	2086
2.9	2274	2328	1910	2095
2.9083	2280	2336	1918	2104
2.9166	2290	2342	1926	2111
2.925	2298	2350	1932	2120
2.9333	2308	2356	1938	2129
2.9416	2316	2364	1946	2140
2.95	2326	2370	1952	2147
2.9583	2330	2378	1960	2156
2.9666	2340	2386	1966	2165
2.975	2348	2392	1972	2172
2.9833	2356	2398	1980	2181
2.9916	2368	2406	1986	2192
3	2374	2412	1994	2201
3.0083	2382	2420	2000	2206
3.0166	2390	2426	2004	2215
3.025	2398	2432	2012	2226
3.0333	2406	2440	2018	2233
3.0416	2412	2446	2024	2240
3.05	2422	2452	2030	2249
3.0583	2432	2460	2038	2258
3.0666	2440	2468	2044	2267
3.075	2448	2474	2050	2276
3.0833	2458	2480	2056	2285
3.0916	2466	2490	2064	2294
3.1	2474	2494	2070	2301
3.1083	2480	2502	2074	2310
3.1166	2488	2508	2082	2319
3.125	2498	2516	2090	2326
3.1333	2506	2522	2096	2337
3.1416	2514	2532	2102	2346
3.15	2522	2538	2108	2355
3.1583	2532	2544	2114	2364
3.1666	2538	2552	2120	2373
3.175	2548	2558	2128	2380
3.1833	2556	2566	2134	2389
3.1916	2566	2570	2140	2398
3.2	2576	2578	2146	2407
3.2083	2584	2586	2152	2418
3.2166	2592	2592	2158	2425
3.225	2598	2600	2166	2432
3.2333	2608	2608	2172	2443
3.2416	2618	2614	2178	2450
3.25	2626	2620	2186	2459
3.2583	2636	2628	2192	2468
3.2666	2644	2634	2198	2475
3.275	2654	2642	2206	2484
3.2833	2662	2648	2212	2493
3.2916	2670	2654	2216	2500
3.3	2678	2662	2224	2511
3.3083	2686	2668	2230	2518
3.3166	2696	2674	2238	2527
3.325	2704	2684	2244	2536
3.3333	2712	2690	2252	2545
3.3416	2720	2698	2258	2554
3.35	2730	2706	2264	2561
3.3583	2738	2710	2270	2567
3.3666	2744	2718	2276	2576
3.375	2752	2724	2282	2583
3.3833	2760	2730	2288	2592
3.3916	2770	2738	2296	2604
3.4	2780	2744	2302	2613
3.4083	2788	2752	2308	2619
3.4166	2800	2762	2316	2628
3.425	2808	2766	2322	2640
3.4333	2816	2774	2328	2649
3.4416	2824	2782	2334	2658
3.45	2834	2788	2344	2667
3.4583	2846	2794	2348	2676
3.4666	2852	2802	2356	2683
3.475	2862	2808	2362	2694
3.4833	2870	2816	2368	2703
3.4916	2878	2822	2376	2710
3.5	2888	2828	2382	2719
3.5083	2898	2838	2390	2730
3.5166	2906	2844	2394	2737
3.525	2914	2850	2402	2746
3.5333	2924	2858	2408	2753
3.5416	2932	2862	2416	2764
3.55	2942	2868	2420	2773
3.5583	2954	2876	2428	2784
3.5666	2958	2882	2434	2791
3.575	2972	2888	2440	2798
3.5833	2976	2896	2448	2807
3.5916	2984	2904	2452	2818
3.6	2994	2908	2460	2821
3.6083	3000	2918	2466	2830
3.6166	3008	2922	2472	2841
3.625	3018	2930	2480	2850
3.6333	3026	2936	2484	2859
3.6416	3036	2946	2488	2868
3.65	3044	2952	2496	2877
3.6583	3054	2956	2504	2884
3.6666	3064	2966	2510	2893
3.675	3068	2970	2516	2902
3.6833	3078	2976	2522	2911
3.6916	3086	2984	2530	2920
3.7	3094	2990	2534	2929
3.7083	3106	2998	2542	2936
3.7166	3114	3006	2548	2945
3.725	3122	3012	2554	2954
3.7333	3132	3018	2560	2961
3.7416	3144	3026	2568	2972
3.75	3152	3032	2574	2981
3.7583	3160	3040	2580	2992
3.7666	3168	3046	2586	2999
3.775	3178	3054	2594	3008
3.7833	3188	3060	2600	3017
3.7916	3198	3068	2606	3026
3.8	3208	3074	2612	3033
3.8083	3216	3082	2620	3042
3.8166	3224	3088	2628	3051
3.825	3234	3096	2632	3062
3.8333	3244	3102	2640	3069
3.8416	3252	3108	2646	3078
3.85	3262	3116	2652	3087
3.8583	3272	3122	2658	3096
3.8666	3282	3128	2666	3105
3.875	3288	3136	2672	3114
3.8833	3298	3142	2680	3123
3.8916	3306	3148	2684	3130
3.9	3314	3154	2692	3139
3.9083	3322	3162	2698	3146
3.9166	3332	3168	2706	3155
3.925	3342	3174	2710	3164
3.9333	3348	3180	2716	3171
3.9416	3358	3188	2724	3180
3.95	3366	3194	2730	3189
3.9583	3378	3202	2738	3198
3.9666	3386	3208	2742	3205
3.975	3394	3216	2748	3214
3.9833	3402	3222	2756	3221
3.9916	3412	3228	2762	3232
4	3420	3236	2768	3241
4.0083	3430	3242	2774	3248
4.0166	3438	3250	2782	3257
4.025	3448	3256	2788	3264
4.0333	3458	3262	2794	3275
4.0416	3466	3270	2800	3282
4.05	3474	3276	2808	3288
4.0583	3486	3284	2814	3300
4.0666	3494	3290	2820	3309
4.075	3502	3298	2826	3318
4.0833	3514	3304	2832	3327
4.0916	3522	3312	2838	3334
4.1	3532	3320	2844	3343
4.1083	3540	3326	2850	3352
4.1166	3550	3332	2856	3361
4.125	3560	3340	2864	3370
4.1333	3570	3346	2866	3379
4.1416	3578	3354	2876	3386
4.15	3588	3358	2880	3397
4.1583	3600	3366	2888	3404
4.1666	3608	3372	2896	3413
4.175	3618	3378	2900	3422
4.1833	3624	3386	2908	3429
4.1916	3634	3392	2914	3438
4.2	3642	3398	2918	3444
4.2083	3652	3404	2926	3456
4.2166	3664	3414	2932	3467
4.225	3672	3418	2936	3474
4.2333	3680	3424	2942	3480
4.2416	3690	3432	2950	3490
4.25	3698	3438	2956	3499
4.2583	3710	3444	2960	3510
4.2666	3718	3450	2968	3517
4.275	3730	3460	2974	3528
4.2833	3738	3464	2980	3535
4.2916	3748	3472	2986	3544
4.3	3758	3478	2992	3553
4.3083	3766	3486	2998	3560
4.3166	3776	3490	3004	3569
4.325	3784	3498	3012	3578
4.3333	3794	3506	3016	3587
4.3416	3806	3514	3024	3596
4.35	3814	3518	3030	3605
4.3583	3826	3524	3036	3612
4.3666	3834	3534	3042	3621
4.375	3844	3538	3048	3627
4.3833	3852	3546	3054	3636
4.3916	3860	3554	3060	3645
4.4	3870	3560	3068	3652
4.4083	3882	3566	3072	3664
4.4166	3890	3572	3078	3673
4.425	3902	3582	3088	3682
4.4333	3910	3588	3092	3691
4.4416	3920	3594	3098	3700
4.45	3928	3600	3104	3706
4.4583	3938	3608	3110	3718
4.4666	3948	3612	3116	3725
4.475	3958	3620	3124	3734
4.4833	3968	3628	3132	3743
4.4916	3978	3634	3136	3752
4.5	3988	3642	3142	3763
4.5083	3996	3648	3150	3772
4.5166	4008	3656	3152	3779
4.525	4016	3662	3160	3788
4.5333	4026	3668	3166	3795
4.5416	4034	3676	3172	3806
4.55	4044	3680	3178	3813
4.5583	4054	3686	3184	3822
4.5666	4064	3692	3190	3831
4.575	4074	3700	3196	3840
4.5833	4084	3708	3202	3847
4.5916	4096	3714	3210	3858
4.6	4104	3720	3214	3867
4.6083	4114	3728	3224	3874
4.6166	4126	3736	3228	3883
4.625	4134	3742	3234	3890
4.6333	4142	3748	3240	3901
4.6416	4152	3754	3246	3908
4.65	4162	3762	3254	3917
4.6583	4172	3768	3260	3928
4.6666	4180	3774	3266	3935
4.675	4190	3782	3272	3944
4.6833	4202	3790	3278	3953
4.6916	4210	3794	3284	3962
4.7	4220	3802	3292	3971
4.7083	4230	3808	3298	3980
4.7166	4238	3816	3306	3989
4.725	4250	3822	3310	3998
4.7333	4258	3828	3316	4007
4.7416	4268	3838	3322	4016
4.75	4278	3842	3328	4023
4.7583	4288	3848	3334	4032
4.7666	4298	3856	3340	4041
4.775	4306	3864	3348	4050
4.7833	4314	3870	3352	4059
4.7916	4326	3876	3358	4066
4.8	4336	3880	3362	4077
4.8083	4346	3890	3370	4084
4.8166	4354	3894	3378	4093
4.825	4366	3902	3382	4104
4.8333	4374	3908	3388	4111
4.8416	4384	3914	3396	4118
4.85	4396	3922	3402	4129
4.8583	4406	3928	3408	4138
4.8666	4414	3932	3412	4145
4.875	4424	3938	3420	4156
4.8833	4434	3944	3426	4165
4.8916	4444	3950	3432	4174
4.9	4454	3958	3436	4181
4.9083	4464	3964	3442	4190
4.9166	4474	3970	3448	4201
4.925	4484	3978	3456	4208
4.9333	4492	3984	3460	4217
4.9416	4504	3990	3464	4229
4.95	4512	3998	3472	4238
4.9583	4522	4004	3478	4244
4.9666	4534	4010	3484	4256
4.975	4544	4014	3490	4267
4.9833	4554	4024	3496	4274
4.9916	4564	4030	3502	4285
5	4574	4036	3508	4294
5.0083	4584	4042	3514	4303
5.0166	4596	4052	3520	4312
5.025	4606	4056	3526	4321
5.0333	4614	4062	3532	4328
5.0416	4624	4070	3536	4337
5.05	4634	4076	3544	4346
5.0583	4646	4082	3550	4355
5.0666	4656	4088	3556	4366
5.075	4664	4096	3564	4373
5.0833	4676	4100	3568	4382
5.0916	4686	4108	3574	4389
5.1	4696	4112	3580	4400
5.1083	4706	4120	3586	4407
5.1166	4718	4128	3592	4416
5.125	4728	4136	3598	4427
5.1333	4736	4142	3604	4434
5.1416	4748	4146	3610	4443
5.15	4756	4152	3616	4455
5.1583	4766	4160	3622	4461
5.1666	4778	4166	3628	4470
5.175	4786	4172	3634	4477
5.1833	4794	4178	3638	4484
5.1916	4806	4184	3646	4495
5.2	4816	4188	3652	4502
5.2083	4826	4196	3658	4511
5.2166	4838	4204	3664	4520
5.225	4846	4210	3670	4527
5.2333	4858	4214	3674	4536
5.2416	4868	4222	3682	4545
5.25	4880	4230	3688	4554
5.2583	4888	4234	3694	4563
5.2666	4898	4240	3698	4570
5.275	4910	4248	3706	4577
5.2833	4918	4254	3710	4588
5.2916	4930	4260	3718	4597
5.3	4940	4268	3722	4606
5.3083	4950	4274	3730	4615
5.3166	4962	4278	3734	4624
5.325	4970	4286	3740	4633
5.3333	4980	4292	3748	4642
5.3416	4992	4300	3752	4653
5.35	5002	4304	3758	4660
5.3583	5012	4312	3762	4669
5.3666	5024	4318	3770	4681
5.375	5034	4324	3776	4687
5.3833	5042	4330	3782	4694
5.3916	5054	4336	3788	4703
5.4	5064	4342	3792	4712
5.4083	5072	4350	3798	4721
5.4166	5084	4356	3804	4730
5.425	5094	4362	3810	4742
5.4333	5104	4368	3818	4748
5.4416	5112	4376	3824	4757
5.45	5124	4382	3830	4766
5.4583	5134	4388	3834	4775
5.4666	5144	4394	3842	4785
5.475	5154	4402	3848	4796
5.4833	5164	4408	3852	4805
5.4916	5174	4412	3860	4814
5.5	5186	4418	3864	4821
5.5083	5194	4424	3872	4830
5.5166	5204	4430	3876	4836
5.525	5216	4438	3882	4846
5.5333	5226	4442	3890	4852
5.5416	5236	4450	3894	4864
5.55	5246	4456	3900	4873
5.5583	5258	4462	3906	4882
5.5666	5266	4470	3912	4888
5.575	5278	4476	3918	4898
5.5833	5286	4480	3924	4904
5.5916	5298	4486	3930	4913
5.6	5306	4492	3936	4920
5.6083	5314	4500	3942	4925
5.6166	5326	4504	3948	4934
5.625	5336	4510	3952	4945
5.6333	5344	4516	3958	4954
5.6416	5356	4522	3964	4959
5.65	5364	4530	3970	4968
5.6583	5376	4536	3976	4974
5.6666	5384	4542	3982	4986
5.675	5394	4546	3984	4995
5.6833	5406	4554	3994	5004
5.6916	5416	4560	3998	5013
5.7	5428	4566	4004	5017
5.7083	5438	4570	4010	5026
5.7166	5450	4578	4014	5038
5.725	5460	4584	4022	5047
5.7333	5474	4590	4028	5056
5.7416	5482	4596	4034	5065
5.75	5494	4600	4036	5074
5.7583	5502	4608	4044	5083
5.7666	5514	4614	4048	5092
5.775	5524	4622	4054	5101
5.7833	5536	4626	4062	5110
5.7916	5548	4634	4068	5119
5.8	5558	4640	4072	5128
5.8083	5566	4644	4080	5139
5.8166	5576	4650	4086	5144
5.825	5588	4654	4092	5153
5.8333	5598	4660	4098	5162
5.8416	5608	4668	4104	5173
5.85	5618	4674	4110	5182
5.8583	5628	4680	4116	5189
5.8666	5636	4686	4122	5198
5.875	5648	4692	4126	5209
5.8833	5660	4698	4132	5218
5.8916	5668	4704	4138	5225
5.9	5676	4708	4144	5234
5.9083	5690	4716	4148	5243
5.9166	5700	4720	4154	5252
5.925	5710	4726	4160	5261
5.9333	5720	4734	4166	5270
5.9416	5730	4738	4170	5279
5.95	5740	4744	4176	5288
5.9583	5752	4750	4184	5295
5.9666	5764	4756	4190	5307
5.975	5772	4762	4194	5313
5.9833	5784	4768	4200	5322
5.9916	5794	4774	4206	5334
6	5804	4780	4214	5343
6.0083	5814	4786	4218	5352
6.0166	5824	4792	4226	5359
6.025	5836	4800	4230	5370
6.0333	5844	4804	4236	5377
6.0416	5856	4812	4242	5388
6.05	5866	4816	4246	5397
6.0583	5876	4822	4254	5404
6.0666	5888	4828	4258	5413
6.075	5898	4832	4266	5422
6.0833	5908	4840	4274	5435
6.0916	5920	4846	4278	5442
6.1	5930	4852	4284	5451
6.1083	5942	4858	4290	5463
6.1166	5952	4864	4296	5469
6.125	5960	4870	4300	5478
6.1333	5972	4874	4304	5485
6.1416	5980	4880	4312	5496
6.15	5992	4886	4316	5505
6.1583	6000	4892	4324	5514
6.1666	6010	4898	4330	5528
6.175	6024	4902	4336	5535
6.1833	6030	4908	4342	5544
6.1916	6042	4914	4348	5553
6.2	6052	4920	4354	5560
6.2083	6062	4926	4360	5569
6.2166	6070	4932	4368	5578
6.225	6080	4938	4372	5587
6.2333	6088	4944	4376	5596
6.2416	6098	4948	4384	5603
6.25	6108	4956	4390	5612
6.2583	6118	4962	4396	5623
6.2666	6126	4966	4402	5632
6.275	6138	4974	4408	5641
6.2833	6148	4980	4412	5652
6.2916	6158	4986	4420	5661
6.3	6170	4992	4426	5670
6.3083	6178	4996	4432	5679
6.3166	6188	5002	4438	5689
6.325	6200	5008	4444	5698
6.3333	6208	5014	4452	5709
6.3416	6220	5020	4458	5718
6.35	6228	5026	4462	5727
6.3583	6238	5030	4468	5738
6.3666	6248	5038	4476	5747
6.375	6258	5044	4480	5754
6.3833	6270	5048	4488	5765
6.3916	6278	5054	4492	5772
6.4	6290	5060	4500	5781
6.4083	6298	5066	4506	5792
6.4166	6312	5070	4512	5799
6.425	6320	5076	4516	5811
6.4333	6332	5082	4524	5820
6.4416	6340	5088	4528	5831
6.45	6350	5092	4536	5838
6.4583	6360	5098	4542	5847
6.4666	6370	5102	4548	5856
6.475	6380	5110	4552	5863
6.4833	6390	5114	4558	5874
6.4916	6400	5120	4564	5885
6.5	6414	5126	4568	5894
6.5083	6424	5130	4574	5903
6.5166	6432	5138	4580	5912
6.525	6442	5142	4586	5924
6.5333	6452	5148	4592	5928
6.5416	6460	5154	4598	5939
6.55	6472	5160	4602	5951
6.5583	6482	5164	4610	5957
6.5666	6492	5170	4616	5966
6.575	6502	5176	4622	5976
6.5833	6514	5182	4626	5987
6.5916	6524	5186	4634	5996
6.6	6534	5192	4640	6007
6.6083	6544	5198	4646	6016
6.6166	6554	5204	4652	6023
6.625	6566	5210	4660	6037
6.6333	6574	5216	4664	6043
6.6416	6586	5220	4672	6055
6.65	6596	5226	4678	6061
6.6583	6606	5232	4684	6070
6.6666	6618	5238	4688	6082
6.675	6628	5242	4694	6091
6.6833	6638	5248	4702	6100
6.6916	6648	5254	4708	6111
6.7	6658	5260	4714	6120
6.7083	6666	5268	4720	6129
6.7166	6678	5270	4728	6141
6.725	6688	5278	4732	6150
6.7333	6698	5282	4740	6159
6.7416	6710	5288	4746	6170
6.75	6718	5292	4750	6174
6.7583	6728	5300	4756	6183
6.7666	6738	5304	4764	6192
6.775	6748	5308	4768	6199
6.7833	6758	5314	4774	6211
6.7916	6768	5318	4780	6217
6.8	6776	5326	4786	6229
6.8083	6786	5330	4792	6238
6.8166	6794	5336	4800	6247
6.825	6804	5342	4804	6258
6.8333	6816	5348	4810	6265
6.8416	6826	5354	4818	6274
6.85	6836	5358	4822	6281
6.8583	6844	5364	4828	6292
6.8666	6858	5368	4834	6303
6.875	6866	5374	4840	6312
6.8833	6876	5380	4846	6321
6.8916	6886	5384	4852	6335
6.9	6896	5390	4858	6344
6.9083	6906	5396	4864	6353
6.9166	6916	5402	4872	6364
6.925	6928	5408	4878	6373
6.9333	6940	5412	4882	6380
6.9416	6950	5418	4890	6391
6.95	6960	5424	4896	6400
6.9583	6972	5432	4900	6412
6.9666	6980	5434	4906	6418
6.975	6990	5440	4912	6430
6.9833	7000	5448	4920	6439
6.9916	7010	5452	4926	6448
7	7022	5456	4932	6459
7.0083	7032	5464	4938	6470
7.0166	7042	5468	4946	6477
7.025	7052	5474	4952	6491
7.0333	7062	5480	4958	6493
7.0416	7072	5486	4962	6504
7.05	7082	5492	4970	6516
7.0583	7090	5498	4976	6522
7.0666	7100	5504	4982	6531
7.075	7112	5508	4986	6543
7.0833	7118	5514	4992	6547
7.0916	7130	5516	4998	6556
7.1	7138	5522	5004	6565
7.1083	7150	5528	5012	6577
7.1166	7160	5534	5018	6583
7.125	7170	5540	5024	6595
7.1333	7182	5546	5032	6606
7.1416	7190	5552	5038	6613
7.15	7202	5556	5042	6624
7.1583	7212	5562	5050	6633
7.1666	7222	5568	5054	6640
7.175	7230	5572	5062	6649
7.1833	7242	5578	5064	6658
7.1916	7252	5584	5072	6665
7.2	7262	5590	5076	6674
7.2083	7270	5596	5082	6687
7.2166	7280	5602	5088	6696
7.225	7290	5604	5094	6703
7.2333	7298	5612	5100	6712
7.2416	7310	5616	5106	6719
7.25	7320	5622	5112	6730
7.2583	7328	5626	5118	6742
7.2666	7340	5634	5124	6751
7.275	7350	5638	5130	6760
7.2833	7360	5644	5138	6767
7.2916	7370	5650	5144	6778
7.3	7380	5656	5150	6787
7.3083	7390	5660	5158	6796
7.3166	7402	5668	5160	6805
7.325	7410	5672	5168	6814
7.3333	7422	5676	5172	6821
7.3416	7432	5684	5182	6832
7.35	7440	5690	5186	6841
7.3583	7450	5694	5192	6850
7.3666	7462	5700	5198	6859
7.375	7470	5706	5204	6866
7.3833	7482	5712	5210	6880
7.3916	7490	5718	5216	6884
7.4	7500	5722	5224	6893
7.4083	7512	5728	5228	6904
7.4166	7520	5732	5236	6911
7.425	7530	5740	5240	6922
7.4333	7540	5744	5248	6934
7.4416	7550	5750	5254	6943
7.45	7560	5756	5260	6954
7.4583	7570	5762	5266	6961
7.4666	7578	5766	5272	6972
7.475	7590	5774	5278	6983
7.4833	7598	5780	5286	6990
7.4916	7610	5784	5290	6999
7.5	7618	5790	5298	7011
7.5083	7632	5794	5302	7020
7.5166	7642	5802	5308	7031
7.525	7650	5806	5314	7040
7.5333	7660	5810	5322	7049
7.5416	7668	5818	5326	7058
7.55	7680	5826	5332	7067
7.5583	7690	5830	5338	7078
7.5666	7700	5836	5344	7085
7.575	7708	5842	5350	7096
7.5833	7718	5846	5358	7106
7.5916	7730	5852	5364	7115
7.6	7740	5858	5368	7124
7.6083	7748	5862	5374	7133
7.6166	7758	5868	5380	7139
7.625	7768	5874	5386	7153
7.6333	7776	5880	5394	7160
7.6416	7788	5886	5398	7171
7.65	7800	5890	5406	7180
7.6583	7810	5896	5410	7189
7.6666	7816	5902	5416	7200
7.675	7828	5908	5422	7209
7.6833	7838	5912	5430	7216
7.6916	7848	5918	5436	7228
7.7	7858	5920	5442	7237
7.7083	7868	5926	5448	7246
7.7166	7878	5934	5452	7255
7.725	7886	5938	5460	7266
7.7333	7898	5944	5466	7275
7.7416	7908	5950	5474	7286
7.75	7918	5956	5480	7295
7.7583	7930	5962	5484	7307
7.7666	7942	5968	5492	7316
7.775	7952	5974	5498	7325
7.7833	7962	5980	5504	7334
7.7916	7972	5986	5510	7343
7.8	7982	5992	5516	7352
7.8083	7990	5998	5522	7361
7.8166	8002	6002	5530	7372
7.825	8012	6010	5534	7381
7.8333	8020	6014	5538	7390
7.8416	8032	6020	5546	7402
7.85	8042	6028	5552	7413
7.8583	8052	6032	5558	7417
7.8666	8060	6038	5564	7429
7.875	8070	6046	5570	7438
7.8833	8080	6052	5576	7449
7.8916	8088	6056	5582	7454
7.9	8098	6062	5588	7463
7.9083	8110	6068	5596	7474
7.9166	8118	6074	5602	7481
7.925	8128	6078	5606	7490
7.9333	8138	6084	5612	7499
7.9416	8150	6088	5618	7510
7.95	8160	6094	5624	7519
7.9583	8170	6100	5632	7528
7.9666	8182	6108	5636	7537
7.975	8192	6112	5644	7544
7.9833	8202	6118	5648	7558
7.9916	8214	6122	5654	7562
8	8222	6126	5662	7573
8.0083	8232	6134	5668	7582
8.0166	8242	6138	5674	7594
8.025	8252	6144	5678	7600
8.0333	8264	6150	5686	7610
8.0416	8272	6156	5692	7619
8.05	8282	6160	5696	7628
8.0583	8294	6168	5704	7637
8.0666	8304	6172	5710	7646
8.075	8314	6180	5716	7655
8.0833	8322	6184	5722	7666
8.0916	8336	6192	5730	7677
8.1	8342	6196	5734	7686
8.1083	8356	6202	5742	7698
8.1166	8364	6208	5748	7707
8.125	8372	6214	5752	7716
8.1333	8386	6220	5760	7725
8.1416	8396	6226	5764	7732
8.15	8406	6232	5770	7743
8.1583	8414	6236	5776	7754
8.1666	8426	6242	5782	7763
8.175	8436	6248	5790	7774
8.1833	8446	6254	5794	7781
8.1916	8456	6260	5800	7790
8.2	8464	6266	5808	7799
8.2083	8476	6272	5814	7811
8.2166	8486	6278	5818	7820
8.225	8496	6284	5824	7829
8.2333	8504	6290	5830	7836
8.2416	8514	6294	5836	7847
8.25	8524	6302	5844	7854
8.2583	8534	6306	5850	7865
8.2666	8544	6310	5856	7872
8.275	8556	6316	5862	7881
8.2833	8566	6322	5866	7892
8.2916	8576	6326	5874	7901
8.3	8586	6332	5880	7910
8.3083	8596	6338	5886	7919
8.3166	8608	6342	5890	7930
8.325	8620	6350	5898	7942
8.3333	8628	6356	5902	7949
8.3416	8636	6362	5908	7960
8.35	8648	6366	5914	7967
8.3583	8658	6374	5922	7976
8.3666	8666	6378	5926	7987
8.375	8676	6382	5932	7996
8.3833	8686	6388	5940	8005
8.3916	8694	6394	5944	8014
8.4	8704	6400	5952	8023
8.4083	8716	6406	5958	8030
8.4166	8724	6412	5962	8043
8.425	8736	6420	5972	8050
8.4333	8744	6424	5976	8057
8.4416	8756	6430	5982	8066
8.45	8764	6436	5988	8077
8.4583	8774	6442	5994	8086
8.4666	8784	6446	6000	8093
8.475	8796	6454	6004	8104
8.4833	8804	6458	6012	8113
8.4916	8816	6462	6018	8123
8.5	8824	6470	6022	8132
8.5083	8834	6476	6030	8141
8.5166	8844	6482	6038	8147
8.525	8854	6488	6042	8159
8.5333	8862	6494	6050	8168
8.5416	8874	6500	6056	8177
8.55	8884	6504	6060	8186
8.5583	8894	6510	6066	8197
8.5666	8906	6514	6074	8206
8.575	8914	6520	6078	8215
8.5833	8926	6526	6084	8226
8.5916	8936	6532	6090	8236
8.6	8946	6536	6098	8245
8.6083	8958	6544	6104	8254
8.6166	8970	6548	6110	8263
8.625	8978	6556	6116	8272
8.6333	8988	6560	6124	8283
8.6416	8998	6566	6128	8290
8.65	9010	6572	6136	8301
8.6583	9020	6580	6142	8310
8.6666	9028	6584	6148	8319
8.675	9038	6590	6154	8326
8.6833	9048	6596	6160	8337
8.6916	9056	6602	6166	8344
8.7	9066	6608	6172	8355
8.7083	9078	6614	6178	8364
8.7166	9086	6620	6184	8373
8.725	9094	6626	6192	8382
8.7333	9106	6632	6194	8391
8.7416	9116	6636	6200	8401
8.75	9124	6644	6206	8410
8.7583	9134	6648	6212	8419
8.7666	9144	6656	6216	8425
8.775	9154	6660	6224	8434
8.7833	9164	6666	6230	8446
8.7916	9174	6672	6236	8455
8.8	9184	6678	6242	8462
8.8083	9194	6684	6248	8471
8.8166	9204	6686	6252	8480
8.825	9214	6694	6258	8491
8.8333	9224	6698	6266	8500
8.8416	9234	6706	6272	8511
8.85	9246	6712	6278	8520
8.8583	9254	6716	6282	8527
8.8666	9264	6722	6290	8538
8.875	9274	6728	6296	8545
8.8833	9282	6736	6304	8554
8.8916	9296	6740	6310	8565
8.9	9304	6746	6316	8575
8.9083	9312	6752	6322	8586
8.9166	9322	6758	6328	8597
8.925	9334	6764	6334	8604
8.9333	9344	6770	6340	8615
8.9416	9352	6776	6348	8624
8.95	9364	6780	6354	8636
8.9583	9374	6786	6360	8642
8.9666	9384	6792	6366	8651
8.975	9394	6798	6370	8663
8.9833	9406	6802	6378	8672
8.9916	9412	6810	6382	8681
9	9422	6816	6388	8690
9.0083	9432	6820	6396	8699
9.0166	9444	6826	6402	8706
9.025	9454	6832	6406	8717
9.0333	9462	6838	6410	8724
9.0416	9472	6842	6416	8733
9.05	9484	6850	6424	8742
9.0583	9492	6856	6432	8751
9.0666	9504	6862	6436	8760
9.075	9512	6868	6442	8771
9.0833	9522	6870	6446	8778
9.0916	9530	6876	6454	8785
9.1	9540	6884	6460	8794
9.1083	9548	6890	6466	8805
9.1166	9558	6896	6472	8816
9.125	9570	6902	6478	8823
9.1333	9580	6908	6484	8832
9.1416	9590	6912	6490	8841
9.15	9600	6920	6498	8853
9.1583	9610	6924	6504	8859
9.1666	9620	6930	6510	8871
9.175	9630	6936	6514	8877
9.1833	9642	6942	6522	8889
9.1916	9650	6946	6528	8893
9.2	9662	6954	6532	8902
9.2083	9668	6960	6538	8914
9.2166	9680	6964	6544	8923
9.225	9690	6972	6550	8929
9.2333	9698	6976	6558	8941
9.2416	9710	6984	6562	8950
9.25	9720	6988	6570	8959
9.2583	9732	6994	6574	8968
9.2666	9740	7000	6582	8977
9.275	9752	7006	6588	8986
9.2833	9760	7014	6594	8993
9.2916	9768	7018	6600	9004
9.3	9780	7022	6608	9013
9.3083	9788	7032	6612	9022
9.3166	9798	7038	6618	9029
9.325	9810	7042	6622	9036
9.3333	9818	7048	6628	9047
9.3416	9828	7052	6636	9056
9.35	9840	7060	6642	9067
9.3583	9848	7064	6648	9076
9.3666	9856	7072	6654	9085
9.375	9866	7076	6660	9092
9.3833	9878	7080	6668	9103
9.3916	9888	7088	6670	9110
9.4	9896	7094	6678	9117
9.4083	9906	7100	6684	9128
9.4166	9916	7106	6690	9140
9.425	9926	7110	6696	9149
9.4333	9936	7116	6702	9160
9.4416	9946	7124	6708	9167
9.45	9956	7130	6714	9178
9.4583	9966	7136	6720	9187
9.4666	9974	7140	6726	9198
9.475	9986	7148	6732	9205
9.4833	9996	7154	6738	9216
9.4916	10004	7158	6746	9225
9.5	10016	7166	6752	9234
9.5083	10024	7170	6758	9243
9.5166	10034	7178	6762	9255
9.525	10046	7182	6770	9264
9.5333	10056	7188	6776	9273
9.5416	10064	7196	6782	9284
9.55	10074	7200	6788	9293
9.5583	10082	7206	6794	9302
9.5666	10094	7212	6802	9314
9.575	10102	7218	6806	9320
9.5833	10112	7222	6812	9334
9.5916	10126	7228	6814	9338
9.6	10132	7236	6824	9347
9.6083	10142	7240	6830	9356
9.6166	10150	7248	6836	9366
9.625	10160	7252	6840	9372
9.6333	10172	7258	6848	9384
9.6416	10180	7264	6854	9393
9.65	10190	7270	6858	9399
9.6583	10198	7276	6866	9406
9.6666	10210	7282	6872	9418
9.675	10218	7288	6876	9427
9.6833	10226	7292	6882	9433
9.6916	10238	7300	6890	9445
9.7	10244	7306	6896	9454
9.7083	10256	7312	6900	9460
9.7166	10264	7316	6906	9469
9.725	10274	7322	6914	9479
9.7333	10286	7330	6918	9490
9.7416	10294	7336	6924	9499
9.75	10304	7340	6932	9508
9.7583	10314	7346	6936	9517
9.7666	10324	7352	6942	9526
9.775	10332	7358	6950	9535
9.7833	10342	7364	6954	9544
9.7916	10352	7372	6962	9555
9.8	10360	7374	6968	9562
9.8083	10370	7380	6974	9571
9.8166	10380	7388	6982	9582
9.825	10390	7394	6986	9592
9.8333	10400	7400	6992	9601
9.8416	10408	7402	6998	9610
9.85	10420	7408	7002	9621
9.8583	10430	7414	7008	9628
9.8666	10440	7420	7014	9639
9.875	10448	7426	7020	9648
9.8833	10460	7432	7028	9657
9.8916	10468	7438	7034	9664
9.9	10476	7444	7038	9675
9.9083	10486	7450	7046	9684
9.9166	10494	7456	7050	9693
9.925	10506	7460	7056	9702
9.9333	10514	7464	7060	9714
9.9416	10522	7470	7068	9718
9.95	10530	7476	7074	9727
9.9583	10540	7482	7078	9738
9.9666	10550	7488	7084	9747
9.975	10558	7494	7090	9754
9.9833	10568	7498	7096	9763
9.9916	10578	7506	7102	9772
10	10586	7512	7106	9781
10.0083	10594	7516	7114	9790
10.0166	10604	7522	7120	9799
10.025	10614	7528	7126	9806
10.0333	10624	7532	7132	9818
10.0416	10632	7538	7138	9824
10.05	10642	7542	7142	9836
10.0583	10652	7548	7150	9845
10.0666	10660	7554	7156	9854
10.075	10670	7560	7158	9860
10.0833	10678	7566	7166	9870
10.0916	10688	7570	7172	9879
10.1	10700	7574	7180	9888
10.1083	10710	7580	7186	9897
10.1166	10720	7586	7190	9908
10.125	10730	7592	7198	9915
10.1333	10740	7598	7202	9926
10.1416	10748	7604	7206	9935
10.15	10760	7608	7212	9944
10.1583	10768	7614	7218	9951
10.1666	10776	7620	7224	9962
10.175	10786	7626	7230	9971
10.1833	10794	7630	7236	9978
10.1916	10802	7638	7244	9985
10.2	10812	7642	7250	9994
10.2083	10822	7648	7256	10003
10.2166	10832	7654	7262	10014
10.225	10838	7660	7268	10021
10.2333	10848	7666	7276	10030
10.2416	10858	7672	7280	10039
10.25	10868	7676	7284	10048
10.2583	10876	7682	7290	10059
10.2666	10884	7688	7296	10066
10.275	10894	7694	7302	10077
10.2833	10904	7698	7310	10086
10.2916	10912	7704	7316	10096
10.3	10922	7710	7322	10107
10.3083	10930	7716	7326	10111
10.3166	10938	7720	7332	10120
10.325	10948	7726	7338	10129
10.3333	10958	7732	7342	10138
10.3416	10966	7738	7348	10147
10.35	10976	7742	7354	10154
10.3583	10986	7746	7362	10163
10.3666	10994	7752	7368	10172
10.375	11004	7758	7372	10181
10.3833	11012	7764	7380	10188
10.3916	11018	7770	7384	10197
10.4	11030	7774	7390	10206
10.4083	11036	7780	7394	10215
10.4166	11046	7786	7398	10227
10.425	11054	7792	7404	10233
10.4333	11066	7798	7410	10245
10.4416	11072	7802	7416	10254
10.45	11082	7808	7422	10263
10.4583	11088	7814	7426	10270
10.4666	11098	7820	7434	10276
10.475	11108	7826	7440	10288
10.4833	11116	7832	7444	10297
10.4916	11126	7836	7450	10306
10.5	11132	7842	7456	10315
10.5083	11144	7846	7462	10324
10.5166	11152	7852	7468	10331
10.525	11160	7858	7472	10342
10.5333	11168	7864	7478	10351
10.5416	11176	7868	7484	10355
10.55	11186	7874	7490	10367
10.5583	11194	7880	7496	10373
10.5666	11204	7884	7502	10385
10.575	11210	7890	7506	10392
10.5833	11220	7896	7512	10401
10.5916	11226	7902	7518	10410
10.6	11240	7906	7524	10419
10.6083	11248	7910	7528	10428
10.6166	11256	7916	7536	10437
10.625	11264	7920	7540	10446
10.6333	11274	7926	7546	10455
10.6416	11282	7932	7552	10464
10.65	11292	7938	7556	10475
10.6583	11300	7944	7562	10482
10.6666	11310	7948	7568	10491
10.675	11318	7954	7574	10500
10.6833	11324	7960	7578	10509
10.6916	11334	7964	7584	10518
10.7	11344	7970	7588	10527
10.7083	11352	7976	7594	10532
10.7166	11360	7980	7600	10543
10.725	11370	7986	7608	10550
10.7333	11378	7992	7614	10561
10.7416	11388	7998	7616	10568
10.75	11394	8002	7622	10572
10.7583	11402	8006	7628	10581
10.7666	11410	8012	7634	10593
10.775	11420	8018	7640	10599
10.7833	11428	8024	7644	10606
10.7916	11438	8030	7650	10615
10.8	11444	8034	7654	10624
10.8083	11452	8040	7662	10631
10.8166	11460	8044	7666	10640
10.825	11470	8050	7672	10649
10.8333	11478	8054	7678	10658
10.8416	11486	8060	7684	10667
10.85	11496	8068	7690	10676
10.8583	11502	8072	7698	10683
10.8666	11512	8076	7702	10694
10.875	11520	8082	7706	10701
10.8833	11528	8086	7712	10710
10.8916	11536	8092	7718	10719
10.9	11544	8096	7724	10726
10.9083	11554	8102	7730	10735
10.9166	11560	8108	7734	10742
10.925	11570	8112	7740	10751
10.9333	11578	8118	7746	10760
10.9416	11586	8122	7752	10769
10.95	11596	8128	7758	10778
10.9583	11604	8134	7762	10785
10.9666	11612	8140	7768	10794
10.975	11620	8144	7774	10803
10.9833	11626	8148	7778	10810
10.9916	11636	8152	7784	10819
11	11644	8160	7788	10830
11.0083	11652	8162	7794	10837
11.0166	11662	8168	7798	10846
11.025	11666	8172	7804	10853
11.0333	11674	8178	7808	10864
11.0416	11682	8184	7814	10871
11.05	11690	8188	7818	10880
11.0583	11698	8194	7826	10889
11.0666	11706	8200	7830	10896
11.075	11718	8206	7836	10905
11.0833	11726	8210	7840	10911
11.0916	11736	8216	7848	10920
11.1	11746	8220	7854	10929
11.1083	11752	8226	7858	10936
11.1166	11760	8230	7864	10943
11.125	11768	8234	7870	10952
11.1333	11778	8240	7874	10961
11.1416	11784	8244	7880	10968
11.15	11792	8250	7886	10975
11.1583	11800	8254	7892	10986
11.1666	11808	8260	7896	10993
11.175	11814	8266	7902	11002
11.1833	11822	8270	7908	11009
11.1916	11830	8274	7914	11018
11.2	11836	8280	7918	11024
11.2083	11844	8284	7922	11031
11.2166	11852	8290	7928	11038
11.225	11858	8294	7932	11049
11.2333	11868	8300	7938	11056
11.2416	11876	8304	7942	11063
11.25	11882	8308	7946	11072
11.2583	11890	8314	7954	11083
11.2666	11898	8320	7958	11090
11.275	11906	8324	7964	11099
11.2833	11914	8326	7970	11106
11.2916	11922	8332	7974	11115
11.3	11928	8334	7980	11122
11.3083	11934	8336	7986	11128
11.3166	11940	8342	7990	11137
11.325	11948	8346	7996	11146
11.3333	11956	8352	8002	11155
11.3416	11964	8354	8006	11164
11.35	11970	8360	8012	11171
11.3583	11980	8364	8018	11180
11.3666	11986	8366	8022	11187
11.375	11994	8370	8026	11194
11.3833	12000	8374	8032	11201
11.3916	12004	8380	8036	11212
11.4	12012	8386	8044	11219
11.4083	12018	8390	8048	11228
11.4166	12024	8392	8056	11237
11.425	12032	8396	8060	11244
11.4333	12040	8398	8066	11253
11.4416	12046	8402	8070	11259
11.45	12054	8404	8076	11268
11.4583	12060	8406	8082	11277
11.4666	12068	8400	8088	11287
11.475	12076	8282	8094	11293
11.4833	12082		8098	11302
11.4916	12092		8102	11309
11.5	12098		8108	11316
11.5083	12104		8112	11325
11.5166	12110		8116	11332
11.525	12118		8120	11341
11.5333	12124		8124	11348
11.5416	12128		8130	11354
11.55	12134		8134	11363
11.5583	12142		8138	11368
11.5666	12148		8144	11379
11.575	12154		8146	11386
11.5833	12160		8154	11393
11.5916	12164		8160	11402
11.6	12172		8166	11409
11.6083	12176		8170	11415
11.6166	12182		8174	11420
11.625	12188		8180	11429
11.6333	12196		8186	11433
11.6416	12200		8190	11442
11.65	12206		8194	11449
11.6583	12216		8202	11456
11.6666	12222		8206	11465
11.675	12230		8212	11470
11.6833	12236		8218	11479
11.6916	12242		8224	11485
11.7	12250		8230	11492
11.7083	12256		8234	11501
11.7166	12262		8238	11506
11.725	12268		8246	11515
11.7333	12274		8250	11522
11.7416	12282		8256	11528
11.75	12288		8260	11540
11.7583	12296		8266	11544
11.7666	12302		8270	11555
11.775	12308		8276	11562
11.7833	12316		8282	11569
11.7916	12322		8286	11580
11.8	12328		8292	11585
11.8083	12336		8294	11592
11.8166	12342		8300	11601
11.825	12350		8304	11607
11.8333	12356		8310	11616
11.8416	12360		8314	11623
11.85	12366		8320	11630
11.8583	12374		8326	11637
11.8666	12380		8330	11644
11.875	12386		8336	11653
11.8833	12392		8342	11659
11.8916	12398		8346	11664
11.9	12404		8352	11673
11.9083	12410		8356	11680
11.9166	12414		8362	11689
11.925	12422		8368	11696
11.9333	12428		8370	11702
11.9416	12434		8374	11707
11.95	12440		8380	11714
11.9583	12446		8386	11723
11.9666	12452		8390	11729
11.975	12458		8394	11736
11.9833	12462		8400	11743
11.9916	12470		8406	11750
12	12476		8410	11757
12.0083	12482		8416	11766
12.0166	12488		8420	11772
12.025	12494		8424	11779
12.0333	12498		8430	11786
12.0416	12504		8434	11795
12.05	12512		8440	11802
12.0583	12516		8444	11806
12.0666	12520		8450	11815
12.075	12528		8454	11822
12.0833	12534		8458	11829
12.0916	12542		8462	11838
12.1	12546		8468	11845
12.1083	12548		8474	11854
12.1166	12558		8480	11861
12.125	12564		8482	11867
12.1333	12568		8486	11872
12.1416	12574		8494	11876
12.15	12580		8498	11879
12.1583	12562		8590	11777
12.1666	12560		8610	11775
12.175	12560		8626	11775
12.1833	12564		8636	11779
12.1916	12568		8648	11781
12.2	12572		8660	11784
12.2083	12578		8670	11791
12.2166	12582		8680	11793
12.225	12588		8688	11797
12.2333	12594		8698	11804
12.2416	12600		8706	11809
12.25	12606		8714	11815
12.2583	12612		8722	11822
12.2666	12618		8730	11827
12.275	12624		8738	11836
12.2833	12630		8746	11842
12.2916	12638		8754	11849
12.3	12644		8760	11858
12.3083	12650		8768	11865
12.3166	12656		8776	11872
12.325	12666		8784	11881
12.3333	12672		8790	11890
12.3416	12678		8796	11897
12.35	12684		8800	11904
12.3583	12694		8806	11915
12.3666	12698		8814	11922
12.375	12704		8820	11931
12.3833	12710		8826	11937
12.3916	12718		8832	11946
12.4	12724		8838	11955
12.4083	12730		8846	11965
12.4166	12738		8850	11971
12.425	12744		8858	11980
12.4333	12750		8864	11987
12.4416	12756		8872	11998
12.45	12762		8874	12003
12.4583	12766		8882	12014
12.4666	12774		8888	12023
12.475	12780		8894	12032
12.4833	12786		8900	12041
12.4916	12790		8906	12048
12.5	12796		8912	12057
12.5083	12802		8918	12066
12.5166	12808		8924	12073
12.525	12812		8928	12082
12.5333	12818		8936	12091
12.5416	12824		8940	12100
12.55	12830		8942	12109
12.5583	12836		8950	12116
12.5666	12840		8956	12125
12.575	12846		8962	12134
12.5833	12850		8964	12139
12.5916	12856		8970	12150
12.6	12862		8976	12157
12.6083	12868		8980	12166
12.6166	12872		8986	12175
12.625	12882		8992	12184
12.6333	12888		8996	12193
12.6416	12892		9000	12197
12.65	12898		9006	12209
12.6583	12904		9006	12218
12.6666	12908		9006	12227
12.675	12914		8984	12233
12.6833	12918		8982	12243
12.6916	12924		8982	12252
12.7	12926		8988	12258
12.7083	12932		8990	12265
12.7166	12938		8986	12274
12.725	12942		8982	12283
12.7333	12948		8942	12290
12.7416	12950		8716	12299
12.75	12956			12304
12.7583	12962			12315
12.7666	12968			12322
12.775	12972			12328
12.7833	12976			12337
12.7916	12978			12342
12.8	12984			12349
12.8083	12986			12356
12.8166	12992			12365
12.825	12996			12371
12.8333	13002			12376
12.8416	13006			12385
12.85	13012			12392
12.8583	13016			12401
12.8666	13020			12407
12.875	13024			12412
12.8833	13028			12419
12.8916	13034			12428
12.9	13036			12432
12.9083	13042			12439
12.9166	13046			12446
12.925	13052			12455
12.9333	13056			12459
12.9416	13060			12466
12.95	13064			12471
12.9583	13068			12480
12.9666	13074			12487
12.975	13078			12496
12.9833	13080			12502
12.9916	13088			12509
13	13090			12514
13.0083	13096			12520
13.0166	13100			12530
13.025	13102			12534
13.0333	13108			12543
13.0416	13112			12548
13.05	13116			12554
13.0583	13120			12561
13.0666	13122			12568
13.075	13126			12575
13.0833	13130			12579
13.0916	13132			12586
13.1	13136			12593
13.1083	13140			12597
13.1166	13144			12604
13.125	13148			12609
13.1333	13150			12613
13.1416	13154			12622
13.15	13156			12627
13.1583	13160			12631
13.1666	13164			12638
13.175	13168			12647
13.1833	13172			12652
13.1916	13176			12656
13.2	13178			12663
13.2083	13182			12670
13.2166	13186			12676
13.225	13190			12679
13.2333	13192			12685
13.2416	13196			12692
13.25	13200			12699
13.2583	13204			12706
13.2666	13208			12710
13.275	13210			12717
13.2833	13214			12722
13.2916	13218			12728
13.3	13222			12733
13.3083	13226			12737
13.3166	13226			12742
13.325	13232			12751
13.3333	13236			12758
13.3416	13238			12762
13.35	13242			12767
13.3583	13246			12774
13.3666	13248			12778
13.375	13252			12785
13.3833	13254			12789
13.3916	13258			12796
13.4	13262			12801
13.4083	13266			12805
13.4166	13268			12810
13.425	13272			12814
13.4333	13274			12821
13.4416	13278			12826
13.45	13282			12830
13.4583	13284			12839
13.4666	13288			12844
13.475	13294			12850
13.4833	13298			12855
13.4916	13300			12859
13.5	13304			12864
13.5083	13308			12871
13.5166	13310			12873
13.525	13312			12878
13.5333	13314			12882
13.5416	13316			12889
13.55	13322			12893
13.5583	13324			12900
13.5666	13326			12905
13.575	13328			12909
13.5833	13332			12916
13.5916	13336			12918
13.6	13336			12925
13.6083	13340			12930
13.6166	13342			12934
13.625	13346			12939
13.6333	13348			12945
13.6416	13352			12950
13.65	13352			12954
13.6583	13356			12959
13.6666	13358			12966
13.675	13360			12970
13.6833	13366			12975
13.6916	13366			12979
13.7	13368			12984
13.7083	13372			12991
13.7166	13374			12993
13.725	13374			12995
13.7333	13378			13002
13.7416	13380			13006
13.75	13380			13011
13.7583	13384			13018
13.7666	13384			13022
13.775	13386			13027
13.7833	13390			13029
13.7916	13394			13036
13.8	13396			13040
13.8083	13400			13043
13.8166	13400			13049
13.825	13402			13054
13.8333	13404			13058
13.8416	13408			13061
13.85	13410			13070
13.8583	13412			13074
13.8666	13414			13076
13.875	13416			13083
13.8833	13418			13088
13.8916	13420			13090
13.9	13424			13095
13.9083	13424			13099
13.9166	13426			13104
13.925	13428			13110
13.9333	13428			13113
13.9416	13430			13117
13.95	13434			13122
13.9583	13434			13128
13.9666	13436			13135
13.975	13438			13135
13.9833	13438			13142
13.9916	13440			13149
14	13444			13153
14.0083	13446			13158
14.0166	13446			13160
14.025	13448			13167
14.0333	13450			13169
14.0416	13452			13176
14.05	13452			13180
14.0583	13454			13185
14.0666	13454			13192
14.075	13456			13194
14.0833	13456			13198
14.0916	13458			13205
14.1	13458			13210
14.1083	13460			13212
14.1166	13462			13221
14.125	13460			13226
14.1333	13460			13226
14.1416	13462			13232
14.15	13462			13237
14.1583	13458			13239
14.1666	13460			13244
14.175	13458			13248
14.1833	13458			13250
14.1916	13460			13255
14.2	13460			13260
14.2083	13458			13264
14.2166	13460			13266
14.225	13458			13269
14.2333	13456			13273
14.2416	13458			13278
14.25	13456			13282
14.2583	13456			13284
14.2666	13458			13289
14.275	13456			13291
14.2833	13454			13293
14.2916	13454			13298
14.3	13456			13302
14.3083	13452			13305
14.3166	13450			13309
14.325	13448			13314
14.3333	13448			13314
14.3416	13446			13316
14.35	13444			13321
14.3583	13442			13325
14.3666	13442			13325
14.375	13438			13330
14.3833	13438			13332
14.3916	13436			13336
14.4	13432			13339
14.4083	13430			13341
14.4166	13430			13343
14.425	13426			13345
14.4333	13426			13350
14.4416	13424			13352
14.45	13422			13354
14.4583	13420			13357
14.4666	13416			13359
14.475	13414			13361
14.4833	13410			13363
14.4916	13408			13366
14.5	13406			13368
14.5083	13404			13370
14.5166	13400			13375
14.525	13398			13377
14.5333	13396			13377
14.5416	13392			13379
14.55	13388			13384
14.5583	13386			13386
14.5666	13386			13388
14.575	13382			13391
14.5833	13380			13391
14.5916	13376			13393
14.6	13372			13395
14.6083	13370			13397
14.6166	13368			13400
14.625	13366			13404
14.6333	13362			13404
14.6416	13360			13409
14.65	13356			13411
14.6583	13352			13411
14.6666	13348			13411
14.675	13348			13415
14.6833	13344			13415
14.6916	13342			13418
14.7	13338			13418
14.7083	13336			13420
14.7166	13334			13422
14.725	13334			13422
14.7333	13330			13422
14.7416	13332			13424
14.75	13330			13427
14.7583	13324			13427
14.7666	13320			13427
14.775	13314			13429
14.7833	13308			13431
14.7916	13302			13431
14.8	13296			13434
14.8083	13288			13434
14.8166	13286			13436
14.825	13280			13438
14.8333	13278			13440
14.8416	13276			13438
14.85	13272			13443
14.8583	13270			13443
14.8666	13266			13447
14.875	13264			13445
14.8833	13260			13449
14.8916	13260			13452
14.9	13256			13452
14.9083	13252			13454
14.9166	13252			13456
14.925	13248			13458
14.9333	13248			13458
14.9416	13244			13461
14.95	13244			13463
14.9583	13242			13463
14.9666	13236			13465
14.975	13236			13465
14.9833	13234			13467
14.9916	13230			13470
15	13226			13470
15.0083	13218			13472
15.0166	13202			13472
15.025	13192			13472
15.0333	13180			13472
15.0416	13168			13476
15.05	13156			13476
15.0583	13146			13476
15.0666	13138			13476
15.075	13126			13479
15.0833	13114			13479
15.0916	13108			13479
15.1	13100			13479
15.1083	13094			13481
15.1166	13084			13481
15.125	13082			13483
15.1333	13076			13483
15.1416	13072			13483
15.15	13068			13486
15.1583	13064			13486
15.1666	13060			13488
15.175	13054			13490
15.1833	13050			13490
15.1916	13046			13488
15.2	13040			13490
15.2083	13034			13492
15.2166	13030			13495
15.225	13024			13492
15.2333	13020			13495
15.2416	13016			13495
15.25	13012			13495
15.2583	13004			13499
15.2666	12998			13499
15.275	12994			13499
15.2833	12988			13501
15.2916	12984			13501
15.3	12978			13504
15.3083	12974			13504
15.3166	12968			13504
15.325	12966			13506
15.3333	12960			13506
15.3416	12956			13508
15.35	12954			13508
15.3583	12950			13506
15.3666	12948			13508
15.375	12948			13510
15.3833	12942			13510
15.3916	12910			13515
15.4	12912			13513
15.4083	12912			13510
15.4166	12912			13508
15.425	12914			13508
15.4333	12914			13508
15.4416	12914			13508
15.45	12914			13508
15.4583	12914			13508
15.4666	12914			13508
15.475	12914			13508
15.4833	12914			13508
15.4916	12914			13508
15.5	12912			13508
15.5083	12912			13508
15.5166	12910			13508
15.525	12910			13508
15.5333	12908			13508
15.5416	12908			13508
15.55	12906			13510
15.5583	12904			13508
15.5666	12904			13510
15.575	12902			13510
15.5833	12902			13508
15.5916	12900			13510
15.6	12898			13510
15.6083	12896			13510
15.6166	12896			13513
15.625	12896			13508
15.6333	12892			13510
15.6416	12892			13510
15.65	12890			13510
15.6583	12890			13510
15.6666	12886			13510
15.675	12884			13513
15.6833	12884			13510
15.6916	12896			13510
15.7	12892			13510
15.7083	12888			13510
15.7166	12884			13513
15.725	12882			13510
15.7333	12880			13510
15.7416	12878			13510
15.75	12876			13510
15.7583	12872			13513
15.7666	12872			13510
15.775	12870			13510
15.7833	12868			13515
15.7916	12864			13510
15.8	12862			13513
15.8083	12854			13515
15.8166	12850			13513
15.825	12846			13515
15.8333	12840			13515
15.8416	12836			13515
15.85	12832			13515
15.8583	11896			13515
15.8666				13517
15.875				13515
15.8833				13515
15.8916				13515
15.9				13515
15.9083				13515
15.9166				13515
15.925				13517
15.9333				13515
15.9416				13517
15.95				13517
15.9583				13517
15.9666				13517
15.975				13517
15.9833				13517
15.9916				13519
16				13519
16.0083				13519
16.0166				13519
16.025				13519
16.0333				13519
16.0416				13519
16.05				13522
16.0583				13519
16.0666				13519
16.075				13522
16.0833				13519
16.0916				13519
16.1				13522
16.1083				13519
16.1166				13519
16.125				13517
16.1333				13519
16.1416				13517
16.15				13517
16.1583				13515
16.1666				13515
16.175				13513
16.1833				13508
16.1916				13504
16.2				13490
16.2083				13479
16.2166				13470
16.225				13463
16.2333				13458
16.2416				13454
16.25				13449
16.2583				13447
16.2666				13440
16.275				13438
16.2833				13436
16.2916				13434
16.3				13429
16.3083				13427
16.3166				13427
16.325				13427
16.3333				13422
16.3416				13422
16.35				13420
16.3583				13420
16.3666				13418
16.375				13415
16.3833				13415
16.3916				13418
16.4				13415
16.4083				13413
16.4166				13409
16.425				13400
16.4333				13395
16.4416				13391
16.45				13386
16.4583				13384
16.4666				13377
16.475				13377
16.4833				13373
16.4916				13368
16.5				13363
16.5083				13359
16.5166				13357
16.525				13354
16.5333				13352
16.5416				13348
16.55				13343
16.5583				13343
16.5666				13339
16.575				13339
16.5833				13334
16.5916				13330
16.6				13325
16.6083				13325
16.6166				13486
16.625				13481
16.6333				13481
16.6416				13481
[truncated: 722 more rows]
